# Supplementary material
Source: PubMed Central journal article supplement (PMC2579374)
Supplement: 0804956105_0804956105SI.pdf [file 0804956105_0804956105SI.pdf]

# Supporting Information

Sarkar *et al.* 10.1073/pnas.0804956105

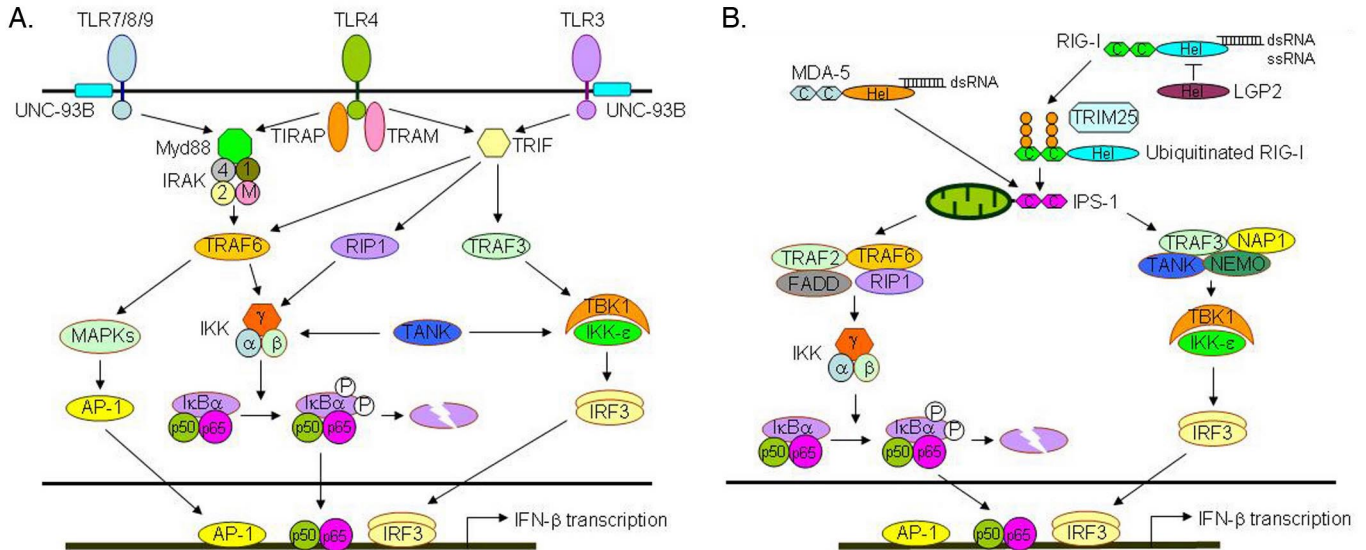

**Fig. S1.** An overview of induction of type I IFN. (A) Type I IFN induction by Toll-like receptors (TLRs). Five TLRs (TLR3, TLR4, TLR7, TLR8, and TLR9) have been shown to induce the production of type I IFNs. TLR7, TLR8, and TLR9 trigger the classical Myd88-dependent TLR pathway, via the TIR-containing cytosolic adaptor Myd88. TLR3 triggers the alternative Myd88-independent, TIR domain-containing adaptor, inducing the IFN- $\beta$  (TRIF)-dependent pathway. TLR4 triggers the Myd88-dependent pathway via the TIRAP-Myd88 interaction and triggers the Myd88-independent pathway via the TRIF-related adapter molecule (TRAM)-TRIF interaction. The Myd88-dependent pathway results in the activation of both NF- $\kappa$ B and MAPKs via the IL-1 receptor associated kinase (IRAK) complex, which comprises two active kinases (IRAK-1 and IRAK-4) and two noncatalytic subunits (IRAK-2 and IRAK-M). The Myd88-independent pathway results in the activation of IRF3 via two kinases: NF- $\kappa$ B kinase  $\epsilon$  (IKK- $\epsilon$ ) and TANK-binding kinase-1 (TBK-1). TRAF family member-associated NF- $\kappa$ B activator (TANK) interacts with NF- $\kappa$ B essential modulator (NEMO; IKK- $\gamma$ ), TBK1 and IRF3 and may therefore form a liaison between the Myd88-dependent and Myd88-independent pathways. (B) Type I IFN production by MDA-5 and RIG-I. ssRNA with a 5'-triphosphate group and dsRNA are detected by the RIG-I and MDA-5. Activation of RIG-I involves lysine-63-linked ubiquitination (Ub) by the ubiquitin ligase TRIM25. This activation is inhibited by LGP2. Both MDA-5 and RIG-I activate the adapter proteins IPS-1 via CARD domain (C) interactions. IPS-1 then induces signaling pathways that result in the activation of the transcription factors IRF3 and NF- $\kappa$ B.
