# Supplementary material
Source: PubMed Central journal article supplement (PMC2579374)
Supplement: 0804956105_ST1.pdf [file 0804956105_ST1.pdf]

**Table S1.** Accession numbers of helicase DEAD/DEAH genes used in this study

| Codename  | Taxon     | Accession no.    |
|-----------|-----------|------------------|
| AeI_hel_1 | Aedes     | EAT386561        |
| AeI_hel_2 | Aedes     | EAT41563         |
| AB_hel__  | Bacteria  | archaeon         |
| AD_HYP1_D | Aplysia   | AASC01031229     |
| AD_HYP2_D | Aplysia   | AASC01159495     |
| AD_HYP3_D | Aplysia   | gbAASC01109799   |
| AfA_hel__ | Archaea   | NP070287         |
| Ao_F_hel_ | fungus    | XP753471         |
| AfF_ifhi_ | fungus    | XP749133         |
| AgI_hel1_ | Anopheles | EAA00143XP320199 |
| AgI_hel2_ | Anopheles | EAA00171         |
| AgI_hel3_ | Anopheles | EAA004563        |
| AgI_hel4_ | Anopheles | EAA02455         |
| AgI_hel5_ | Anopheles | EAA04138         |
| AgI_hel6_ | Anopheles | EAA04660         |
| AgI_hel7_ | Anopheles | EAA07044XP559208 |
| AgI_hel8_ | Anopheles | EAA07398         |
| AgI_hel9_ | Anopheles | EAA08469         |
| AgI_hel10 | Anopheles | EAA09253         |
| AgI_hel11 | Anopheles | EAA101833        |
| AgI_hel12 | Anopheles | 314684EAA10198   |
| AgI_hel13 | Anopheles | EAA11295XP315400 |
| AgI_hel14 | Anopheles | EAA11913XP315948 |
| AgI_hel15 | Anopheles | EAA12654         |
| AgI_hel16 | Anopheles | EAA13218XP318117 |
| AgI_hel17 | Anopheles | EAA13221         |
| AgI_hel18 | Anopheles | EAA14161         |

|           |                |                                   |
|-----------|----------------|-----------------------------------|
| AgI_hel19 | Anopheles      | EAA14744XP319825                  |
| AgI_hel20 | Anopheles      | EAL38704XP551895                  |
| AgI1DIC_D | Anopheles      | XP309566                          |
| AgI_hel21 | Anopheles      | XP311385                          |
| AgI2DIC_D | Anopheles      | XP3219592                         |
| AgI_hel22 | Anopheles      | XP3109692                         |
| AmI1DIC_D | Apis           | XP001120496                       |
| AmI2DIC_D | Apis           | XP001122561                       |
| AmI_hel1_ | Apis           | XP393083CG7922PA                  |
| AmI_hel2_ | Apis           | XP394691                          |
| AmI_hel3_ | Apis           | XP6245102                         |
| AmI_hel4_ | Apis           | XP624800                          |
| Ao_F_hel_ | Aspergillus    | BAE55820                          |
| AtP_DCL_D | Arabidopsis    | NP5661993                         |
| AtP_hel__ | Arabidopsis    | NP174785                          |
| BF_C1_D__ | Bradyrhizobium | CAL79857                          |
| BtB_hel__ | Burkholderia   | YP439173                          |
| BtM_helM_ | Bos            | P615590                           |
| BtM_helR_ | Bos            | P580928                           |
| BtM_helU_ | Bos            | XP591336                          |
| BtM_hel1_ | Bos            | NP001015545                       |
| BtM_hel2_ | Bos            | NP9762351                         |
| CaF_hel_D | Candida        | XP718614                          |
| CbW1DEA_D | Ceanarhabditis | DUCAE56725                        |
| CbW2DEA_D | Ceanarhabditis | UCAE61499                         |
| CeW_hel1_ | Ceanarhabditis | CAE615011CBG05400, NP501018A88708 |
| CbW_hel2_ | Ceanarhabditis | CAE66840                          |
| CeW_hel3_ | Ceanarhabditis | P34529CAE75060                    |
| CeW_hel4_ | Ceanarhabditis | NP490989CAE60391                  |
| CeW_hel5_ | Ceanarhabditis | NP492829                          |

|           |                |                   |
|-----------|----------------|-------------------|
| CeW_hel6_ | Ceanarhabditis | CAE64461          |
| CeW_DEA_D | Ceanarhabditis | NP501960          |
| CfM_DEA_D | Canis          | RWGA39            |
| CfM1_hel_ | Canis          | XP537547          |
| CiV_hel__ | Ciona          | AABS01000049      |
| CiV_DIC_D | Ciona          | AABS01000110      |
| CjB_hel__ | Campylobacter  | YP001000786       |
| CbE_hel__ | Bacteria       | XP5683221         |
| CpB_top_D | Clostridium    | YP699468          |
| CrA_hel__ | Archaea        | BAE95223          |
| CsV_DIC_D | Ciona          | AACT01042303      |
| DdE1_hel_ | Bacteria       | XP0011346281      |
| DdE2_hel_ | Bacteria       | UXP644014         |
| DdE3_hel_ | Bacteria       | XP635263CAC41974  |
| DmI1_hel_ | Drosophila     | NP523778CG6493PA  |
| DmI2_hel_ | Drosophila     | NP524019          |
| DmI3_hel_ | Drosophila     | NP572330          |
| DmI4_hel_ | Drosophila     | NP572632          |
| DmI5_hel_ | Drosophila     | NP609599          |
| DmI6_hel_ | Drosophila     | NP6509712CG7922PA |
| DmI1DIC_D | Drosophila     | NP732463          |
| DmI2DIC_D | Drosophila     | NP9961851         |
| TcI_hel__ | Tribolium      | XP9689931CG4792PA |
| DmI7_hel_ | Drosophila     | NP524453CG4792PA  |
| DrB_tn3_D | Drosophila     | YP001113172       |
| DrV_heM_D | Danio          | NP001074053       |
| DrV_heR_D | Danio          | P001339107        |
| DrV_DEA_D | Danio          | DUNC007125        |
| DrV_DEA_D | Danio          | MAAH97103         |
| DrV1_hel_ | Danio          | NC007118          |

|           |             |                      |       |
|-----------|-------------|----------------------|-------|
| DrM_hel__ | Drosophila  | XP683015             |       |
| DrV2_hel_ | Danio       | XP694124             |       |
| DrV_mgc_D | Danio       | XP701089             |       |
| EcB_hel__ | Bacteria    | YP050432             |       |
| EuA_hel__ | Archaea     | AAT10146             |       |
| PfA_hel__ | Archaea     | 1WP9                 |       |
| FrV1_hel_ | Fugo        | CAAB01000424         |       |
| FrV2_hel_ | Fugo        | CAAB010000381Fugo    |       |
| GgV1_hel_ | Gallus      | XP422365             |       |
| GgV_DAE_D | Gallus      | UAADN02003674        |       |
| GgV2_hel_ | Gallus      | XP422031             |       |
| GgM_hel__ | Gallus      | NP001035555          | SPALQ |
| HaA_hel__ | Archaea     | NP2809761            |       |
| HsM_DEA_D | Homo        | UBAB71141            |       |
| HsM_hel__ | Homo        | UBAC04159            |       |
| HsM_hel__ | Homo        | MAAG54076AAD19826    |       |
| HsM_hel__ | Homo        | NP077024             |       |
| HsM_hel__ | Homo        | NP803187Q9UPY3       | S     |
| MaA1_hel_ | Archaea     | CAJ36563             |       |
| MaA2_hel_ | Archaea     | NP615070             |       |
| MaM_helR_ | Macaca      | NP001036133          |       |
| MaM_helM_ | Macaca      | NP001040588114052719 |       |
| MaM1_hel_ | Macaca      | XP001108799          |       |
| MaM2_hel_ | Monodelphis | XP0011008681         |       |
| MdM_helM_ | Monodelphis | 126326479XP001374256 |       |
| MhA_hel__ | Archaea     | YP503150             |       |
| MjA_hel__ | Archaea     | NP248512H64487       |       |
| MkA_hel__ | Archaea     | NP614961             |       |
| MmM1_helM | Mus         | BAE31652AAH80200     |       |
| MmM_DEA_D | Mus         | UBAC33670            |       |

|           |                    |                               |
|-----------|--------------------|-------------------------------|
| MmM2_hel_ | Mus                | NP084426                      |
| MmM3_hel_ | Mus                | BAC15765Q8R4181683750AAL84638 |
| MsA_hel__ | Archaea            | YP447070                      |
| MtA_hel__ | Archaea            | YP842666                      |
| NeA_hel__ | Archaea            | NP963674                      |
| OvV1_hel_ | Oryzias            | BAAF030189101                 |
| OvV2_hel_ | Oryzias            | BAAF030339341                 |
| OvV3_hel_ | Oryzias            | BAAF03033934                  |
| PpM_hel__ | Pongo              | CAH89418                      |
| PtE_helU_ | Paramecium         | CAI39097                      |
| PtM1_hel_ | Pan                | UXP509928                     |
| PtM2_hel_ | Pan                | XP001154010                   |
| PyE_IFH_D | Plasmodium         | XP731192                      |
| RrM1_helM | Rattus             | XP001055482                   |
| RrM2_hel_ | Rattus             | XP001081462                   |
| RrM3_hel_ | Rattus             | XP001069041                   |
| SmE_hel__ | Strongylocentrotus | CAJ00235                      |
| SpD1_hel_ | Strongylocentrotus | XP001180482                   |
| SpD2_hel_ | Strongylocentrotus | XP0012041351                  |
| SpD_DIC_D | Strongylocentrotus | XP001181040                   |
| SpD1HYP_D | Strongylocentrotus | AAGJ02005534                  |
| SpD2HYP_D | Strongylocentrotus | AAGJ02010786                  |
| SpD3_hel_ | Strongylocentrotus | gbAAGJ02119714, AAGJ02133742  |
| SpF1_hel_ | Strongylocentrotus | NP5936241                     |
| SpF2_hel_ | Strongylocentrotus | NP588215                      |
| SsM_helR_ | Sus                | Q9GLV6                        |
| TaA_hel__ | Archaea            | NP394951                      |
| TbE_hel__ | Trypanosoma        | XP822979                      |
| TbE_DEA_D | Trypanosoma        | UXP823244                     |
| TcE1_hel_ | Trypanosoma        | EAN83446XP823259              |

|           |             |                           |       |
|-----------|-------------|---------------------------|-------|
| TcE2_hel_ | Trypanosoma | EAN87505XP845920          | LVRDH |
| TcE1DEA_D | Trypanosoma | UEAN80693                 |       |
| TcE3_hel_ | Trypanosoma | XP845112EAN838541EAN83854 | GS    |
| TbE4_hel_ | Trypanosoma | XP828952                  | VP    |
| TcE5_hel_ | Trypanosoma | EAN89008                  |       |
| TcE2DEA_D | Trypanosoma | UEAN90577                 |       |
| TcE6_hel_ | Trypanosoma | EAN90635                  |       |
| TcE7_hel_ | Trypanosoma | XP846985EAN95108          |       |
| TcE3DEA_D | Trypanosoma | UEAN95665                 |       |
| TcE8_hel_ | Trypanosoma | EAN97670XP822871          |       |
| TcE9_hel_ | Trypanosoma | EAN99766                  |       |
| TcI1_hel_ | Trypanosoma | XP966623                  |       |
| TcI_DIC_D | Trypanosoma | XP968684                  |       |
| TcI2_hel_ | Trypanosoma | 9736701CG7922PA           |       |
| TnV1_hel_ | Trypanosoma | CAG10454                  |       |
| TnV2_hel_ | Trypanosoma | CAG09339                  |       |
| TnV3_hel_ | Trypanosoma | CAG02830                  |       |
| TnV4_hel_ | Trypanosoma | embCAAE010150041          |       |
| TtE_DEA_D | Tetrahymena | UBAD347221                |       |
| TtE1_hel_ | Tetrahymena | EAS01066                  |       |
| TtE2_hel_ | Tetrahymena | EAS03211                  |       |
| XIV_hel_  | Xenopus     | AAH73528MGC82787          |       |
| TcE10_hel | Trypanosoma | XP807714                  |       |
| TcI3_hel_ | Trypanosoma | XP967018                  |       |
| AgI22_hel | Anopheles   | XP309062                  |       |
| AmI_hel5_ | Apis        | XP001123361               |       |
| CfM2_hel_ | Canis       | XP860567                  |       |
| DrV3_hel_ | Dnio        | CAAK03020666              |       |
| DrV4_hel_ | Dnio        | CAAK03040844              |       |
| GgV3_hel_ | Gallus      | XP4258711PRED             |       |

|           |             |                     |
|-----------|-------------|---------------------|
| MmM4_hel_ | Mus         | BAE29095BAE33716    |
| MmM5_helR | Mus         | Q6Q899              |
| LiE_hel__ | Leishmania  | 68128582146096652CD |
| MmM6_helU | Mus         | BAC35487            |
| MmM7_helU | Mus         | BAE31919            |
| OvV4_hel_ | Oryzias     | BAAF03138338        |
| PtM3_hel_ | Pan         | XP001167022         |
| TcE11_hel | Trypanosoma | EAN98055            |
