# Supplementary material
Source: PubMed Central journal article supplement (PMC2579374)
Supplement: 0804956105_ST2.pdf [file 0804956105_ST2.pdf]

**Table S2.** Accession numbers of CARD box genes used in this study

| Species code    | Domain code | Accession    | Note   |
|-----------------|-------------|--------------|--------|
| MmM Mus         | C1          | Q8VCF0       | cardif |
| HsM Homo        | C1          | BAC77356     | cdf    |
| AcV Anolis      | C1M         | AAWZ01028814 |        |
| BtM Bos         | C1M         | P615590      |        |
| BtM Bos         | C1R         | P580928      |        |
| CfM Canis       | C1M         | P545493      |        |
| CfM Canis       | C1R         | WGA39        |        |
| DrV Danio       | C1R         | P001339107   |        |
| EcM Equus       | C1M         | XP001494380  |        |
| EcM Equus       | C1R         | XP001947895  |        |
| GgV Gallus      | C1          | P422031      |        |
| HsM Homo        | C1M         | AAG343681    |        |
| HsM Homo        | C1R         |              |        |
| MaM Macaca      | C1M         | NP001040588  |        |
| MaM Macaca      | C1R         | NP001036133  |        |
| MdM Monodelphis | C1M         | NP126326479  |        |
| MmM Mus         | C1M         | BAE31652     |        |
| MmM Mus         | C1R         | Q6Q899       |        |
| MmM Mus         | C2M         | BAE33716     |        |
| MmM Mus         | C2R         | Q6Q899       |        |
| SsM Sus         | C1R         | Q9GLV6       |        |
| SsM Sus         | C1M         | NP1093664    |        |
| TnV Tetraodon   | C1          | CAG09339     |        |
| AcV Anolis      | C2M         | AAWZ01028814 |        |
| BtM Bos         | C2M         | XP615590     |        |
| BtM Bos         | C2R         | XP878993     |        |

|     |                    |     |             |
|-----|--------------------|-----|-------------|
| CfM | Canis              | C2M | XP545493    |
| CfM | Canis              | C2R | a11WGA39    |
| DrV | Danio              | C2R | XP001339107 |
| EcM | Equus              | C2M | XP1494380   |
| EcM | Equus              | C2R | XP1497895   |
| GgV | Gallus             | C2  | XP422031    |
| HsM | Homo               | C2R | AAD19826    |
| HsM | Homo               | C2M | AAG54076    |
| MaM | Macaca             | C2R | NP001036133 |
| MaM | Macaca             | C2M | NP001040588 |
| MdM | Monodelphis        | C2M | XP001374256 |
| MdM | Monodelphis        | C2R | XP1366879   |
| RrM | Rattus             | C2M | XP001055482 |
| RrM | Rattus             | C2R | XP001067411 |
| RrM | Rattus             | C1M | P575141     |
| RrM | Rattus             | C1R | P00106741   |
| SpD | Strongylocentrotus | C2  | XP001176626 |
| SsM | Sus                | C2R | Q9GLV6      |
| SsM | Sus                | C2M | NP1093664   |
| TnV | Tetraodon          | C2  | CAG09339    |
