# Supplementary material
Source: PubMed Central journal article supplement (PMC2579374)
Supplement: 0804956105_ST3.pdf [file 0804956105_ST3.pdf]

```
#NEXUS
[MacClade 4.08 registered to desalle, amnh
amnh]
```

```
BEGIN DATA;
  DIMENSIONS NTAX=185 NCHAR=2565;
  FORMAT DATATYPE=PROTEIN SYMBOLS = " 1 2 3 4" MISSING=? GAP=- INTERLEAVE
```

```
;
MATRIX
```

|   |   |   |   |   |   |   |   |   |   |
|---|---|---|---|---|---|---|---|---|---|
| [ |   |   |   |   |   |   |   |   |   |
| 1 |   |   |   |   |   |   |   |   |   |
| 2 |   |   |   |   |   |   |   |   |   |
| ] |   |   |   |   |   |   |   |   |   |
| [ |   |   |   |   |   |   |   |   |   |
| 1 |   |   |   |   |   |   |   |   |   |
| 2 |   |   |   |   |   |   |   |   |   |
| 3 |   |   |   |   |   |   |   |   |   |
| 4 |   |   |   |   |   |   |   |   |   |
| 5 |   |   |   |   |   |   |   |   |   |
| 6 |   |   |   |   |   |   |   |   |   |
| 7 |   |   |   |   |   |   |   |   |   |
| 8 |   |   |   |   |   |   |   |   |   |
| 9 |   |   |   |   |   |   |   |   |   |
| 0 |   |   |   |   |   |   |   |   |   |
| 1 |   |   |   |   |   |   |   |   |   |
| 2 |   |   |   |   |   |   |   |   |   |
| 3 |   |   |   |   |   |   |   |   |   |
| 4 |   |   |   |   |   |   |   |   |   |
| 5 |   |   |   |   |   |   |   |   |   |
| 6 |   |   |   |   |   |   |   |   |   |
| 7 |   |   |   |   |   |   |   |   |   |
| 8 |   |   |   |   |   |   |   |   |   |
| 9 |   |   |   |   |   |   |   |   |   |
| 0 |   |   |   |   |   |   |   |   |   |
| 1 |   |   |   |   |   |   |   |   |   |
| 2 |   |   |   |   |   |   |   |   |   |
| 3 |   |   |   |   |   |   |   |   |   |
| 4 |   |   |   |   |   |   |   |   |   |
| 5 |   |   |   |   |   |   |   |   |   |
| [ |   |   |   |   |   |   |   |   | ] |
| 7 | 8 | 9 | 0 | 1 | 2 | 3 | 4 | 5 | 6 |
| 5 | 6 | 7 | 8 | 9 | 0 | 1 | 2 | 3 | 4 |
| 3 | 4 | 5 | 6 | 7 | 8 | 9 | 0 | 1 | 2 |
| 1 | 2 | 3 | 4 | 5 | 6 | 7 | 8 | 9 | 0 |
| 9 | 0 | 1 | 2 | 3 | 4 | 5 | 6 | 7 | 8 |
| 7 | 8 | 9 | 0 | 1 | 2 | 3 | 4 | 5 | 6 |
| 5 | 6 | 7 | 8 | 9 | 0 | 1 | 2 | 3 | 4 |
| 3 | 4 | 5 | 6 | 7 | 8 | 9 | 0 | 1 | 2 |
| 1 | 2 | 3 | 4 | 5 | 6 | 7 | 8 | 9 | 0 |
| 9 | 0 | 1 | 2 | 3 | 4 | 5 | 6 | 7 | 8 |
| 7 | 8 | 9 | 0 | 1 | 2 | 3 | 4 | 5 | 6 |
| 5 | 6 | 7 | 8 | 9 | 0 | 1 | 2 | 3 | 4 |



```

AeI_hel_1  -----DNNAGNSWIYPTNY-PV-----
-----RK-----YQ-----YSIVQAA--LFK-----
-----NTLVV-----LP-----TGLGKTFIAAVVMYNYLRWY--P-----
-----
TGKV-IFM-----APT-----RP-----LVNQ-----
QIEACYKIMGI-----PK-----EDTAEMTGKQQRKN-----
RTGLW-----QSK-----RVFYV-----TPQV-----VLADIN-----
---SPE---QNF--IN-----EVK-----
LVVVDEAHKA--K---G---RY-----AYTEVI---KAI-----
-----FAILERNLKEHFQNNP-----
-----
-----DSKVIIIFCEYRES-----VAMIQ-----RLLLQ-----
-----N-----RPLIK--PKC-IVGQG-----G-----
-----TAGGLRAVT-----QKEQ-----IAAMKD-----
-----FR-----SG-AC-----NTLIA-----
---TCVAE-----EG-----
ID-----VGE-----V-----DLIVC-----FD-IA-----KNP-----
---TRFVQ-----RI-----GRTG--R-QR-VG--RVLMLV-----
-----
-----TEG--KEHDT-----LKEVMAS-----
-----KDKTNQKLSRSK-----
-----EILGILYRQSPRLVPTEFDP-----KC-----
VETFIKIPSEAEVEEVKSKK-----DRKRKN-----
-----DENQVEEA-TAEVVEEQETRKRR-----
-----KKAEPARGTQDVRNFFRKVDTDLDAT-----
EREVFSSPQKKEDVSVNSLDTSRGSFRAPQ-
DASLRLGKTDQEQELEKI IKPLLRHKARLHREQFLNDRKEVRIREEKVSKS-
-----ILCSNPLKKIF-LEGNLGYLRE [514]
AeI_hel_2  -----IP-----
-----RD-----YQ-----RTMKTIC--M-Q-----
-----KNTIIY-----LP-----TGAGKTHIALMVIKEMGK-----
DLD--KPLTEG-----
-----
GKRT-FFV-----VNT-----VA-----LAKQ-----
QAEFLSHNL--TYDTS-----IYTSDRNVDANKQDK-----
WLEEF-----AKY-----QVIVC-----TCQI-----LLDVLK-----
---H---GYLS--VK-----HIN-----
LLIFDECHHG--V---G---EH-----PMHGIM---EQFLRVP-----
-----VRQLIDQLEKLY--EENRDK-----
-----
-----KAKTLIFVQRRFS-----AKVLY---HLLKIY-----F-----
-----A-----ETEDANLIV--PDF-MVGN-----N-----
-----GSMPESEIEQILS-----AKKD-----RRVLER-----
-----FK-----KN-ET-----NVIVT-----
---TNVLE-----EG-----
ID-----LQM-----C-----NTVVK-----YD-HP-----QTF-----

```

-----ASYQQ-----SK-----GRAR--M-KN-SQ--YMVMLD-----

-----NENRHIFLEKYRLYKSIEEELRRCLIGKTINRPDPLDADV-----  
-----HKELYNEIIPFFFT-----

-AKGAKLDALSAIQLLNRYCMGMPRDAFTNTNVTWER-  
IDLDKGRIIVEVLLPLQSTVREKISGNPMRNIKLAKRSAAFNACRK-----LYENKEL-----

-----NEHLIPIDCKYQLNNLKD VY-  
FRHWKDFD-----ADLGKLAGTQKCIRTHAIQYPKQTTECFPPQ-  
GKPCYIYVLRIAAGFAQDPTNDNVNIFHSLYSENNFGLMTTKP-LPALAKMKFFVTLGLINVHIEETPIVL---  
PNGGSEIELALLRQFHVTVFRDVLKWLKEFLCCDYDNEENSFLVPLKNST----  
HLDWKLIREFQNLSEPPSEISTIARN- [646]  
AB\_hel -----NFDTIGPMKLF GFIEP-----  
-----EPINACDLTVSDSFHLNECQ-----KQVITHA--L-SQ-----  
-----EVTFWV-----GP-----PGTGKTKTLSVLLNHLIR-----

AKKTVLLI-----SHT-----NL-----ALDE-----  
VIKKFAEDPENRSLIDDGKVIRYGNPSNNDPVIKNFLLDNVN-----  
-----DRIIG-----VAYQ-----KIDELK-----  
--R-----QLRDCEQK-----ITQ-----  
ILIITESPDYRKL-----K-----YCEEELAEDENKIAA-----  
-----IQKMRERICYTHSLAEDRLI-----  
-----DILPVQLSDLREEFSAIESDIF-----

-----EIKK-----EIVKYE-----  
-----NFIFG-----  
--NAMVV-----  
GCTLTTCYVDRNLQHCKFD-----VMILDEASMANL-----  
-----PAIFY-----AA-----GRASQYVIAGDFRQIAPIAQS-----

-----SGPNASLWLKRDIFSQAGI-----

VESI KAGR VDSRLVMLKEQYRMHPKIAGI IINDKMYAGQLITNDQTKTDRDQIAALPPYAGHAVVLCDTSKINPWCSYSGS  
SKINLYSAMLAAKLAESA IAGGIKSAGI ITPYKKQVKLI-----

EKQLMEQNIDRKT VSVTTIHKSQGNEKDCI IIDLVEGLPHNLGKQFRSSSIDSDTARLINVAISRAGKGLIVISNNQYFS  
ERLKP GTIFHDLLQEICNKGLVVDSENLLSNPAISGQTTL SGKAEISPDSKQLIYNATEFYRAFIVDIDHASSRIVIFS  
PFITRKRMDMLMNPLKAAVARGVKVHLI IIRNLKEDKTRADKEKLI EELTLQGINAI IASDTNGVRSSFHEKIALIDKTVF  
YFGSLNILS- [695]  
AD\_HYP1\_D-----

FR EG-GY NTLVS QVMRE TCVGE  
IGD V DLIIC FD-AP EG LD  
IRLVQ RM GRTG-R-KR-QG-RIVILV KSP

TQG

[66]

AD\_HYP2\_D

LEMLASLLDKHLIKKGA

KSRGII FVKTRAM ADALK SWLRRC  
RHSQLRALNALTFTGAG  
ASADMT QAEQ DAVIQR  
TSVAE FQ SG-ET RLLVS EG LD  
IPE C NLVIK YN-HV GNE  
VTTVQ TR G

[118]

AD\_HYP3\_D

SIIIFTSTCKY--AQILA--MMC--E--DL--G--P--  
--FP--CVS--LHSML--QKFR--LSGLTK--  
--FK--SD--QV--KVLIA--  
TDVAS--RG--LD--  
--IPT--V--DLIIN--HN--VP--NRP--  
--RDYVH--RV--GRTA--R--A--

[93]

AfA\_hel

--YVTHPLIKENTI--ER--  
--RM--YQ--ISIAATA--LTK--  
--NTLVV--IP--TGLGKTTIAALVIASRLL--N--E--  
DGKV--LFL--APT--KP--LVEQ--  
HARFLKRVLKV--EEIVSLSGEVPPEK--  
RKELW--EKA--RIVVS--TPQV--VENDLL--  
--A--GRIS--LE--DVI--  
LVVFDEAHRA--V--G--NY--AYVFIA--KEY--  
--LEKLKEILKEQFEKNP--  
--DSRVIVFTNYRDS--AEMLV--NELS--

-----PL-FP--VAK-FVGQA-----S-----  
-----RDNDKGMR-----QKEQ-----IETIDK-----  
-----FR-----RG-VY-----KVLVA-----  
-----TSVGE-----EG-----  
LD-----IPS-----T-----DLVVF-----YE-AV-----PSE-----  
-----IRAIQ-----RK-----GRTG--R-GR-EG--RIVVLV-----  
-----  
-----TKG--TRDEA-----YYYSSMK-----  
-----KERKMYDKILEIK-----  
-----R-----IIDRKQRS-----IGDYVLP-----  
-----  
-----EETGIKVIIVDSR-----  
-----ELRSEVVKHLR-EIGAKIEIR- [355]  
AoF1\_hel-----MLDP-----  
-----RE-----YQ-----IELFERA--K-T-----  
-----QNTIAV-----LD-----TGSGKTLIAVLLLLRHTIL-----  
NELDDRANGKT-----  
-----  
HRVS-FFLVFVLLALGRCILTWCKVDS-----VT-----LAYQ-----  
QAAVLRNNI--DQNV-----AHFFGAMGTDLW-DKR-----  
TWDKHL-----QRN-----MVIVC-----TAEI-----LNQCLL-----  
-----N-----SYVR--MD-----QIN-----  
LLIFDEAHHA--K--K-----DH-----PYARII--RDSYFKA-----  
QPSQRPRVFGMTASPIDTK--GDITEAAT-----RIATTSKVQRLRMELSKHFNDT--T-----  
-----GTKCIVFTQKRYT--AKILN--ELFTV-----L-----  
-----N-----IPNLR--PGV-LIGV-----  
-----RPGDIGGMNIT-----FRQQ-----  
FLALVK-----FR-----TG-EI-----NCLFA-----  
-----TSVAE-----  
EG-----LD-----IPD-----C-----NLVIR--FD-LY-----  
-----RTL-----IQYVQ-----SR-----GRAR--H-CT-ST--YAIMVE-----  
-----  
-----KDNAEHEGRLKEIREAENIMRRFCEILPEDRILHGNDD-----  
-----  
LDSFLQEEEGR-R-----TFTVKSTGAKLTYHSAIAILARYASSL-----QYEKETVPQVTVYVVT-----  
IASNAYVCEVILPEKSPIRGLTGS-----PAMRKAV-----  
-----AKRSAAFD-----  
TCLLLRKNRLLLDGYFNSIYHRRLPAMRNAKLAI TCKRTNAYDMLLKPSIWAKQRTTPTETFYGIHMSLLPSKPLSRDHRP  
ILLLTR-----EKLPEFPAFSIYLDEDVE--TKVLSYPLKHGLQISV-  
DKLQSLTVFTLRIFRDIFHKVYEHEVQKMPYWLAPA--  
EAIDGRGSGKNPRDCIDWDTVSVFVHNNDEITFTRNLNPESLVNRFIFDNWDGRFRYFTVAVADTLQPSDPPP-  
[701]

AoF2\_hel TDQPPIGE QVWSPPQKDEPPTQHKLHDALSTWVYPTNLGKT-----  
-----RD-----YQ-----FNIAQKG-LFH-----  
-----NLLVA-----LP-----TGLGKTFIAATIMLNWFRWT-E-----  
-----  
SAQI-IFV-----APT-----KP-----LVAQ-----  
QISACFGIAGI-----PR-----SQTTMLTGEAAPGI-----  
RAEEW-----QNK-----RVFFM-----TPQT-----LINDLK-----  
---S---GIAD-PK-----RIV-----  
LLVVDEAHRA-T---G---GY-----AYVEVV-----  
KFLRRYNQSFRLALTATPGSTVESVQAVIDGLDIARVEIRTEQSLDIREYVHSRNLEYLKS VVLNHFMDAGEGSNGEAS  
DS-QS-----  
-----STRIMIFVHFRDS-----AEEVT-----RVLKR-----  
-----Y-----EPMIR-PHV-FVGQS-----  
-----S-----AKGSEGMG-----  
OKTQ-----LDIVQK-----FK-----KG-TY-----  
-----NTIVA-----TSIGE-----  
-----EG-----LD-----IGE-----V-----DLIVC-----  
-YD-SS-----ASP-----IRMLQ-----RM-----GRTG-R-KR-AG-  
-NIVLLL-----  
-----  
-----MEG-----KEEES-----  
-----YIKAKDN-----  
-----YEKMQMIASG-----SRFTFHDDISPRILPAGIRP-----  
-VA--DKRHIDIP-----  
-----  
-----DENAEQSLPE-----  
-----PKRRGRAPKRPPKKFHMPDNVETGFTK-----  
ASSLTAGPKSKAEKSRKPRTPTPEPVEIPA-LEEVLVLTSAQQRE-----  
LEQHYRNIGAASPQFIRN-----PRNDAFPRLQL-VARPTKVVK-----  
[552]  
AfF\_ifhi -----  
-----  
-----  
-----  
-----  
-----  
-----  
-----  
-----  
-----  
EGLKYLHDRGIVHRDIKPENIL-----  
-----  
-----VADK-----  
-----KLTVK-----  
-----  
-LGD FGL-----AKIIGEDSF'TTTL-----  
YVLPFLFLQIAFFLLPWLILLFTDVGHQVES-----RRRRYTKAVDIWSLGVVLYIC-----



LCGFPPFSDELYTRENPF TLAQQIKMGRFDYPSPYWDSVGD PALDLIDRMLTV

DVEKRITVDECLQHPWLTGKHMSVFDSTEGLTGALGKLD FSKRKVERERTLLSSINDAHFSEHNEGPGAPVKVFHRNNAG  
KRMHNQPAHTIQQSVAPPDENCAPKDFVNLGERGDPVLFEE DQTSHYK [282]

AgI\_hel1 IESFDQL STD YGVSNRLVANIQS C YSTP  
TP VQ MQAIPIL L KT  
HSLHAC AP TSGSKTAAFLIPILHHLK K  
PMK CG

FRA LII CPT RE LAKQ  
TQREALR L GDEM N L RTHVIHMVDDPKKCD  
YSFAS GRSY DILVT TPNR ICYLLS QN  
P PKID LS NIQ  
WVVIDEADKL F ED S KN SFRDQL DTVLT  
LLAFRE MV AQGL

HPPVLV FVQSKDR AQQLF TEL I YD G  
LN VDV IHSDR T  
QRER DNVVRA  
FR EG KI WILIC  
TELMS RG  
ID FKG V NLVV N YD FP PST  
ISYVH RI GRTG R AGRP G KAVTFF

TK DDTVN  
LKSIA  
QLI  
KS AGGEVPD  
YM LQM

[327]  
AgI\_hel2 IEVLQKRCIEIEFP LLA EYDFRNDTINADINIDLKPAAVLRP  
YQ EKSLRKMFGNGRA  
RSGVIV LP CGAGKSLVGVTACCTV

RKRALVLCNSGVSVEQWKQQFKMWSTADDSMICRFTSEAKDK



-----EL-----  
VEMAKQAPGGKGGRLRYSTQTGYRGSSGMGSYQRRPPFN-----  
-----GGGGFGGPPKYGGGM-----  
QGGMMGGMGNKFGGGGMGNKFRDNGMYRGENNWNKGPNGPAMMGPGGYQSHSPQSPQAAAPGSQPGGRYNPNGGQFNMD  
GTPKPQNGRGTYPKQYNNSYAAGPANPSHQY [495]  
AgI\_hel4 ---MPPHPVTSFAHF---GFD---ESLMKSIRK-SEFSTP-----  
-----TP-----IQ-----AQAI PAA--L-SG-----  
-----RDIIGI-----AK-----TGSGKTA AFLWPMLVHIM----D-----  
-----Q--REL-----GPGD-----  
-----  
GPIG-LIL-----APT-----RE-----LSLQ-----  
IYNEAKK-F--GKVYN-----I---SICCCYGG-GSKWEQ-----  
SKALE-----QGA-----EIVVA-----TPGR-----MIDMV---KI-  
---K-----AT-N--LQ-----RVT-----  
YLVLDEADKM--F--NM-G-----FEPQV---RSICN-----  
-----LTNLVKMLS-----  
-----EGSVLIFVTKKAD---AEETA---NNLRLK---D-----  
-----ND--VVL-LHGDM-----D-----  
-----FK-----RK-DV---QSER-----NFVITR-----  
---TDVAA-----DIMVA-----RG-----  
LD-----IPH-----I-----RTVVN---YD-IA-----RDI-----  
---DTHTH-----RI-----GRTG--R-AGEKG--TAYTLI-----  
-----  
-----TD-----KDKEF-----  
-----SGHLV-----  
---EG-----ANQDVPE-----RNL-----  
-----DLMK LAMQSSWFRNSRFKHANKGKNLNVGGAGL-----  
-----  
GFRQRAIQRGPMGRSLDASKVLVEDGDPSPGSPGSSK-----  
GPATDRLSAMRETFRAHNAQFKASSDRTWENTVPEGGVFIKP--AQPELESSSKSDSNL-TSKIDTMPRKKKSRWN-  
[462]  
AgI\_hel5 -----D-----DRIKANLKS-MGFKRL-----  
-----FP-----VQ-----EKVIPWI--L-EAHQ-KPAPFWP-----  
-----RDVCIS-----SP-----TGSGKTLAFAVPVQ LLL---K-----  
---RVAP-----  
-----  
AIRA-LVI-----LPV-----QE-----LAEQ-----  
VFQVFRQ-L--CDGTN-----I---HPVVLSRGMQLEVE-----  
QQKLV--KYCNGEYMPKV-----DIVVT-----TAGR-----LIEHL-----  
HST--KG-----FT--LR-----HLR-----  
FLIVDEADKV--MNQIQ-----NDWL-----  
-----PLTLYGLI-----RENG-----  
-----YRKFLVFTNGINT---SHRLS---FVL--Q---RLFGT-D-----  
-----MV--IEE-WSSSL-----S-----

-----PATR-----KSVLNR--  
-----FS-----LG-KV-----NGIIC-----  
-TDALA-----I-----EVVIS-----YD-MP-----RG-----  
ID-----IEN-----RI-----GRTA--R-AGLRG--TAITLL-----NHI-----  
-----DKYIH-----

-----AE-----DEKKK-----  
-----FNALL-----  
-----KEA-----  
-NK-----RE-----  
-----LETMEVSPSLEEEFAAKYANVLNDLR-----

[340]  
AgI\_hel6-----GFQAM--GLS-----APVLKGILK-MGYKIP-----  
-----TP-----IQ-----RKTIPII--L-DG-----  
-----RDVVAM-----AK-----TGSGKTGCFLIPMFERLK---Q-----  
-----R-----EAKAGG-----

GARA-LIL-----SPT-----RE-----LAIQ-----  
TYKFIKQ-L--GRFMD-----L-----KAILVLGG-DSMDSQ-----  
FAAVH-----TLP-----DVIVA-----TPGR-----FLHLC--VE-----  
---M-----DL-K--LN-----SVQ-----  
YCVFDEADRL--F--EM-G-----FGEQL---TETIK-----  
-----YATLLVLL-----REVIPS-----  
-----TAQTVIFAGTQHH--VELIS---LML-T-----KA--G-----  
-----VP-NSH-VYSGL-----D-----  
-----ASAR-----KINTAK-----  
-----FT-----HR-KV-----NVLVV-----  
-TDIAA-----RG-----  
LD-----IPT-----L-----DFVIN-----LH-FP-----GKP-----  
-----KLFIH-----RV-----GRCA--R-AGRSG--MAYTIF-----

-----SN-----DDVAH-----  
-----LIDLH-----  
-----MFLNRPLDV-----AD-----  
-RK-----TMGIVPP-----

-----DMQETEHL-LVQEYVRHV-----DLATAYRVSNNAYKQYIVTRPAASAASNKRAKQ--  
FKIDELGVLED-FQQEKAPEAGARGKRWKKGKPI SLKKDKKEEEKKEQQEKGKTESSNSKPTVDADAFRNDFLARMK--  
NYRPNATIFELNPKAHAREL-----VAMTQKREADEAKIEK-----HKRKLAE-----  
EQEEQEKQKSKATTVEDEEEQKAG---GKRRKG [526]  
AgI\_hel7-----QL--GVS-----EPIVRALAD-KGFKVP-----  
-----TE-----IQ-----NKSLPVA--I-YGR-----  
-----RDLLGA-----AE-----TGSGKTLAFGI PMLE-----

-----  
-----  
AAPEDKPLYG-LIL- - - - -TPT- - - - -RE- - - - -LAVQ- -  
- - - -INDHLKAVA- -KYT-D- - - -I- - - -NIATVFGG-LATVKQ- -  
- - - -ERMLR- - - - -KCP- - - - -EIVIA- - - - -TPGR- - - - -LWELV- -  
-KSEN- -H- - - -HLSK- -VT- - - -DIR- - - - -KELLALI- -  
YLVIDETDRM- -L- -EK-G- - - -DFYLYYFL- - - -DRHP- -  
-----  
- - - -GRTLVCNSIDC- - -VKRLV- - -SLF- -D- - - -YL- - -N- - -  
- - - -CQ- -PLS- -LFGSM- - - - -Q- - - -  
- - - -QRQR- - - - -LKNLER- - -  
- - - -FT- - - - -AN-PR- - - - -ALLIA- - - -  
- -TDVAA- - - - -RG- - - -  
LD- - - -IPN- - - - -V- - - - -DHVIH- - - -YQ-VP- - - -KTT- -  
- - - -ENYVH- - - - -RS- - - - -GRTA- -R-ASKEG- -LTVLLI- -  
-----  
-----  
- - - -GP- - - - -SEVRD- - - -  
- - - -YVKLN- - - - -  
- -GR- - - - -TEDLPL- - - -QDL- - - -  
-----  
- - - -YPT- - - - -SERVMRQVKERVTLARQIERMDLQORREGATR- - - -  
- - - -SWEDQLAKEFQ- - - - -  
SESEVDSEQEEVRRTEQTKRKRQFRAKRLELSQLLARPIVAERIEMSYPSLNINPTMSEPAATEQSAITVVRKAEQQORIL  
EKK- - - -QQ- - - - - [440]  
AgI\_hel8 DPSSPLHSVKSFEAL- -HLK- - - -PELLQGVYA-MGFNAP- - - -  
- - - -SK- - - - -IQ- - - - -ETALPTL- -L-ADPP- - - -  
- - - -QNMQAQ- - - - -SQ- - - - -SGTGKTAAFVLAMLSRVD- - - -P- -  
- - - -RKP- - - - -  
-----  
-----  
YPQV-ICL- - - - -SPT- - - - -YE- - - - -LAIQ- - - -  
TGEVAAKMA- -KFCKE- - - -I- - - -KLRFAVRGEELP- -K- - - -  
GKKIT- - - - -D- - - - -HIIIG- - - - -TPGK- - - - -LMDWG- - - -IK- -  
- - - -F- - - - -RAFD- -LR- - - - -KIS- - - - -  
VFVLDEADVM- -I- -ATQG- - - - -HQQQC- - - -IRIHK- - - -  
- - - -YQAISNIY- - - - -GVIT- - - - -  
-----  
- - - -VGQAIIFCHTRKT- - -AGWLS- - - -GKM- -T- - - -QD- - -G- - -  
- - - -HS- -VAV-LSGEL- - - - -T- - - -  
- - - -VEQR- - - - -LAVLDR- - - -  
- - - -FR- - - - -AG-LE- - - - -KVLIT- - - -  
- - - -TNVLS- - - - -RG- - - -  
ID- - - -VEQ- - - - -V- - - - -RI- - - - -TIVVN- - - -FD-LP- - - -  
MDQSGRAD-CETYLH- - - - -RI- - - - -GRTG- -R-FGKNG- -IAINLV- - - -  
-----  
-----

-----D-----SD-----HSMEI-----  
-----CRTIE-----  
-----AHF-----  
-----QK-----KIQLLDA-----  
-----EN-----SDEIEKIGS-----

[339]  
AgI\_hel9 ---EDVEVLPTFNSM---GLR---EELLRGIYA-YGFKEP---  
-----SA-----IQ-----QRSIQPI--V-KG-----  
-----RDVIAQ-----AQ-----SGTGKTATFSISILQSMD---T---  
-----T-----LRET-----

QV-LCL-----SPT-----RE-----LAVQ-----  
IQKVILA-L-GDFMN-----V---QCHACIGG-TNLGED-----  
IRKLD-----Y-GQ-----HVVSG-----TPGR-----VFDMI---KR-  
---R-----VL-R-TR-----SIK-----  
MLVLDEADEM--L--NK-G-----FKEQI---YDVYR-----  
-----FDTLCDLY-----DTLT-----

-----ITQAVIFCNTRRK---VDWLT---EKM-R---EA---N---  
-----FT-VSS-MHGDM-----P-----  
-----QKER-----DEIMKE-----  
-----FR-----SG-QS-----RVLIT-----RG-----  
---TDVWA-----  
ID-----VQQ-----V-----SLVIN---YD-LP-----NNR---  
---ELYIH-----RI-----GRSG-R-FGRKG--VAINFV-----

-----KS-----DDIRI-----  
-----LRDIE-----  
-----QYY-----  
---ST-----QIDEMPM-----  
-----NV---ADLI-----

[322]  
AgI\_hel10 ---PIPNPVSEFHQAF---GEY---PDLMEELRK-QKFTTP---  
-----TP-----IQ-----AQAWPIL--L-RG-----  
-----EDLIGI-----AQ-----TGTGKTFLAFLLPALIHIE---G---  
---QPIPRG-----ERG-----

GPNV-LVL-----APT-----RE-----LALQ-----  
IEKEVAK-Y-QFRG-----I---KAVCLYGG-GDRRAQ-----  
INVVR-----NGV-----EILIA-----TPGR-----LNDLV---QE-  
---G-----VV-D-VS-----TIT-----  
YLILDEADRM--L--DM-G-----FEPQI---RKVLL-----  
-----FQRINEFV-----RDMQ-----PT-----

-----D-KV I I F C G K K T R-----A D D L S-----S E F-I-----L S-----N-----  
-----I S-C Q A-I H G N R-----E-----  
-----I K-----N G-T V-----Q S D R-----K I L I A-----E Q A L E D-----  
-----T D V A S-----R G-----  
L D-----I E D-----I-----T H V V N-----Y D-F P-----R N I-----  
-----E E Y V H-----R V-----G R T G-R-A G R T G-----I S L S F M-----

-----T-----R S-----D W G V-----  
-----A G E L I-----  
-----K I L-----  
-K E-----A D Q E V P D-----  
-----E V R D M A R R F E A R-K E R D G G G G R G G R-----G R-----  
-----G F G G N R R-----

-----[356]-----  
A g I \_ h e l l 1-----F K S L E G-K V S-----D H T M K A I G E-M G F T K M-----  
-----T E-----I Q-----A K S I P P L-L-E G-----  
-----R D L I G S-----A K-----T G S G K T L A F L I P A V E L I H-----K-----  
-----L-R F-----K P R N-----

G A G V-I V I-----S P T-----R E-----L A M Q-----  
I F G V L K E-L-M T Y H C-----Q-----T Y G L L M G G-A S R H T E-----  
N E K L E-----K G I-----N I I V A-----T P G R-----L L D H L-----K S-----  
-----T-----P N F L-F K-----N L Q-----  
C L I I D E C D R I-L-E I-G-----F E E D L-----K Q I I S-----  
-----L L V L F T F L-----K K N R-----

-----K K K V M V F F S S C L S-----V K F H H-----E L F N Y I-----D-----  
-----L P-V M S-I H G K Q-----K-----  
-----Q S K R-----T S V F F Q-----  
-----F C-----N A-E T-----G I L L C-----R G-----  
-----T D V A A-----  
L D-----I P A-----V-----D W I V Q-----Y D-P P-----N D T-----  
-----K E Y I H-----R V-----G R T A-R G E D L C G-----H A L L M L-----

-----R P-----E E V G F-----  
-----L K Y L K Q-----  
-----A K V P L N E-----

-----F E F S W S K I A D I Q L Q L E N L M A K N Y F L N Q S G K L A F K T Y V R A Y E G-----  
-----H H M K D V F N I A N L D L V-----  
Q V A K N F G F T Q P P Y V D F G K S F K L H N S E R R P G N R G M G H F K T L N K E K E G K L K I K H I T D R K Q L K K V K Y E-----  
-----[434]-----

```

AgI_hel12  ---NPPDHVESFERS---GLR----EEVMTNVRK-SSYTKP-----
-----TP-----IQ-----RYAIIPII--L-NG-----
-----RDLMAC-----AQ-----TGSGKTAAFMLPMIHLL---D---
-----KEDSLELR-----TR-----
-----
NPYI-VIV-----APT-----RE-----LAIQ-----
IHDEGRK-F-AHGTK-----L---KVCVSYGG-TAVQHQ-----
LQLMR-----GGC-----HVLVA-----TPGR-----LLDFI---DR-
---G-----YV-T-FE-----NVN-----
FVVLDEADRM--L--DM-G-----FLPSI---EKVMG-----
-----RKKLEEIL-----NGGN---PK-----
-----
-----GTLVVFVETKRN---ADYLA---SLM-S---ET---Q-----
-----FP-TTS-IHGDR-----L-----
-----QRER-----EMALYD---
-----FK-----SG-RM-----DVLIA-----
---TSVAA-----RG-----
LD-----IKN-----V-----NHVVN---YD-LP-----KSI---
---DDYVH-----RI-----GRTG--R-VGNKG--RATSFY-----
-----
-----D-----PE-----ADRAM-----
-----ASDLV-----
---TQ-----AGQSVPD-----KIL-----
-----FLK-----
-----DAGGSGSY-----
---MGS-----SQFGGKDIR---DS-----
[349]
AgI_hel13  -----RSLLFERM---SLS---EPVKQALAR-NNFVHP-----
-----SP-----IQ-----ARAIPLA--R-CD-----
-----FDLLVQ-----AK-----SGTGKTLVFAITIVESHD---P---
-----EIA-----
-----
FPQS-LTI-----VPT-----RE-----IAVQ-----
VESVLNRIG--GELGN-----F---KARFIGG-MEISVD-----
RKNLQ-----NCS-----AVVG-----TPGR-----ILHLI---KS-
---N-----VL-N-TS-----YIR-----
TLVMDEADTL--L--QP-S-----MRGDI---DKIVG-----
-----VGVLNEIF-----QQIN-----
-----
-----FAQCVVFANTISK---AETYC---TYL-K---KA---G-----
-----WP-AEV-INSGM-----E-----
-----QRFR-----LKAIED---
-----FR-----SF-RA-----RVLIA-----
---TNLIA-----RG-----
ID-----VEN-----V-----NLVIN---AD-VP-----KDN---
---ATYLH-----RI-----GRAG--R-FGTKG--IAITLV-----
-----

```





GFRLR-----LGC-----EIVIA-----TPGR-----LIDVL--EN-  
--R-----YL-V-LN-----QCT-----  
YIVMDEADRM--I--DM-G-----FEPDV--QKILE-----  
-----RKKLMEIL-----SRGV-----  
-----EPPCIIFVNQKKG--ADVLA--KGL-E--KL--G--G--  
-----YN-ACT-LHGGK-----G--  
-----LK-----NG-SK--QEQR--EYALAS--  
--TDVAG-----RG--  
ID-----IKD-----V-----SLVIN--YD-MA-----KSI--  
--EDYTH-----RI-----GRTG--R-AGKTG--CAISFC-----

-----TK-----DDSHL-  
-----FYDLK-  
-MS-----SPVSVCP-----QML-----  
-----PELMNHPDAQHKPGTVVTKK-----RR-  
-----EEKIF-A-----

[353]  
AgI\_hel16 ---NVPPPLRTFREM--KLP---KAVLAALAK-RNIKKP-----  
-----SP-----IQ-----VQGIPAV--L-AG-----  
-----RDLIGI-----AF-----TGSGKTLVFLVLPIMFCL---E-  
-----QELRLPF-----IKRE-----

GPYG-LII-----CPS-----RE-----LAKQ-----  
THDIIQY-Y--CRHLQEAGMPEI---RTVLAIGG-VPVND-----  
IAIIQ-----QGA-----HIMVA-----TPGR-----LMDML--DK-  
--K-----LV-T-LD-----VCR-----  
YLCMDEADRM--I--DM-G-----FEEDV--RTIFS-----  
-----KVVYLLEC-----LQKT-----  
-----PPPVLIFAEEKQD--VDAIH--EYL-L--LK--G-----D-  
-----VE-AVA-IHGGK-----YRSVES--  
-----FR-----NQ-EK--QEER--DVLVA--  
--TDVAS-----KG--  
LD-----FPD-----V-----QHVIN--YD-MP-----DDI--  
--ENYVH-----RI-----GRTG--R-SGSKG--LATTFI-----

-----N-----KA-----TEQFV-  
-----HLL-----LLDLK-  
-IE-----AQQKVPP-----

----- FLGEL -----

[336]

AgI\_hel17 ----- GVM ----- PEIAKAIDE-MEWMLP -----

----- TD ----- VQ ----- AEAIPLI -L-GG-----

----- GDVLMMA ----- AE ----- TGSGKTGAFCLPILQIVW --- E -

----- TLRDIKEGKTCK -TSSHKGQP -WT-----

----- PVSA ----- ERV-----

----- NGTVVDVP-----

NTITKQHAEGEAAKPKPNAPQA-IVI ----- EPS ----- RE-----

----- LAEQ ----- TFNQIRKFKKHLKDPE ----- V ----- RELLLIGG-VNVREQ-----

----- IEVLQ ----- R-GV ----- DIIVA ----- TPGR-----

----- LEDLI -GG -G -YV-L-LN ----- SCR -----

----- FFVLDEADGL -L-KQ-G ----- YTEMI ----- DRLHK-----

----- LSEAVKML ----- KGEYTLKAIDEHN-----

----- MDRAIIFCRTLKD ----- CDNME ----- RYL -R ----- QV -G-----

----- GQKYS -CVC-LHGDR-----

----- N ----- PKER-----

----- KANLEK ----- FK ----- NK-EV-----

KFLIC ----- TDVAA-----

----- RG ----- LD ----- ITG ----- L ----- PFIIN ----- VT-----

LP ----- DEK ----- SNYVH ----- RI ----- GRVG -R-ADRMG -L-----

[342]

AgI\_hel18 QAENGTDVSKSWEDL --GLI --DTLCTACRG-LKWKAP-----

----- SK ----- IQ ----- REAIPLA -L-QG-----

----- KDIIGL ----- AE ----- TGSGKTGAFALPILQALL --- D -

----- N ----- PQRY-----

----- F-----

A-VVL ----- TPT ----- RE ----- LAYQ-----

ISEQFEA-L-GATIG ----- V ----- KCCVIVGG-MDLVTQ-----

AIQLA ----- RKP ----- HIIIA ----- TPGR ----- LVDHLEN-TK-----

----- G ----- FS ----- LK ----- AIR -----

YLVMDRI -L-NM-D ----- FEEEV ----- NKILK-----

----- NVYLVHVL ----- NELA ----- GN-----

----- SFMIFCSTCNN ----- TVRTA ----- LML -R ----- AL -G-----

----- LA -AVP-LHGQM ----- T-----

----- QNKR ----- LAALNK-----

----- FK ----- SQ-AR ----- QILIS-----

--TDVAS-- --RG--  
LD--IPH--V--DVVLN--LD-IP--MHS--  
--KDYIH--RV--GRTA--R-AGRAG--QAITFV--

--T--Q--Y--  
--DVELY--  
--QRI--  
--E--H--

--LLGKKLPEYKCEQDEVMALQERVAE--AH--  
--RTARIEQDIEE--  
RKASKGGKR--GANDSDEEDTEQFNG--VRKRLKPGNAKGGDRG--  
[388]

AgI\_hel19 --P--  
--FA--VQ--HECIPQA--V-LG--  
--MDILCQ--AK--SGMGKTAVFVLATLQOLE--P--  
--TEN--

VPYV-LVM--CHT--RE--LAFQ--  
ISKEYERFC--KYMPT--I--KVAVFFGG-LPIQKD--  
EEVLK--TTTP--HIIVG--TPGR--VLALIR--  
--N--KKN--LK--NLK--  
HFILDECDKM--L--EQLD--MRRDV--QEIFR--  
--NKKLFELL--DVLE--

--FNQVVIFVKSQR--CMALA--QLL--T--EQ--N--  
--FP--AIG--IHRGM--V--  
--QEER--LSRYQQ--  
--FK--DF-QK--RILVA--  
--TNLFG--RG--  
MD--IER--V--NIVFN--YD-MP--EDS--  
--DTYLH--RV--ARAG--R-FGTKG--LAITFI--

--S--DE--ADAKI--  
--LNDVQ--  
--DRF--  
--DV--NINELPD--

--EIDLSSYIEGR--  
[302]

AgI\_hel20 --LPNTVRRILRDFRGIDDL--  
--YD--WQ--RECLALPAIQER--  
--RNLIYA--LP--TSGGKTLVAEILMLREIICLRNV--

-IFI-----VPY-----VS-----LAQE-----  
KMIALSPFALELQFLLE-----EYSGGKGQCPPRRR-----  
-----KKN-----TIFVC-----TIEK-----  
ALLLLDSLVEVGRAN-----EIG-----  
-----LIVIDELHMIGEQ-----RRGACL-----  
EMMITKVQVLR-----VRLILEVIP-----  
-----ESSCLVFCPTKSKCESLCALLANHLPARLAEH-----  
-----RAEEKEQIIRSLKEDGSIAPVLPQAFRVGVAYHHAGLT-----  
QDER-----RTIEDA-----YR-----AG-IL-----  
-----SLIVC-----TSTLA-----  
-----AG-----VN-----LPA-----K-----RVIIRS-----  
-----PYIGNSFLSLSRYKQ-----MV-----GRAG-----R-----  
AGFGETGESILIC-----  
-----AQRDIPQ-----  
VCEMLCAPMDIAESALIADDRAYFKSLILSAIGLDLCESRDALQALVRCITLLAQQAEERRSIDLAAVTDETIVQLYQGNAI  
KARHDSCLRNPMLVEIG-----  
-----TAA-----  
AAHPGKVIKTIQRTSPLEVNRLGKAAIRAGFNMEKAVRFYDEMVKLGERLCVLDYDLHLILLEDEGREVQLKPDD-----  
FIVLVNQLTNEQLKIAERYGINNGLIAKILTRVA-----  
SGDMVSKMMRFVRVLIVHELWKQTPLAEVASRYHVNAGSLQTLMTSTAGTAFSLLRMCEEIPELWAFKHLL-  
TGMTERLTHYCKLELLPLLTLPVSVKLGRARQLFRAGYT-- [653]  
AgI1DIC\_D  
-----EAILAALV-----CRTF-----  
HDHCMVVFVQTKRT---AHRLR---ILL-G---LL---G---  
-----VK-TGE-LHGDL-----T-----  
-----FK-----DE-QV-----QAQR-----LESKE-----  
TDVAA-----DILIA-----RG-----LD-----  
-----IST-----V-----KTVIN-----FV-MP-----ATL-----  
-EHYIH-----RV-----GRTA-R-AGKAG-VSVSLA-----

-----G-----E-----QERKI-----  
-----VKEIV-----  
KNAVSSVKNRI I PLDI I EKYRNKVAALEPEIDRVLAEEERAEKLL-----  
-----RQ-----TEQQLTS-----  
-----AERKL-----  
LGNAGKAAKQDVPPPREWFQTQHERREEKNRLAGEEQGEKKKAACKRR-----  
-----DDD-----DEE-----  
DFDPVRYHEEKRKQQAAGGGGAVNGKKKSKADANADANKTAKQLARERALEEVRKVSVMVQAKLAKIRNRPGRVNAEE  
EHGNGPADGRAGGKSNK-KRSKNFSRFEH--- [351]  
AgI\_hel21 PFQEKLFSQSFDLSL---DIH---PHSKKNIADLLQYEHL-----  
-----TT-----VQ-----SMAIPSL--L-KG-----  
-----TDALIR-----AQ-----TGSGKTLAYALPLIERLH---T-----  
-----IRPQIHRSD-----  
-----  
GIRA-VVI-----VPT-----RE-----LAVQ-----  
TYELIQKLL--KPFTW-----I---VPGYLTGG-EKRKTE-----  
KARLR-----AGL-----NILIA-----TPGR-----LCDHI---RN-----  
---T-----ESLK--FG-----NVC-----  
CLVLDEADRL--L--EL-G-----YETDV---KQIIEAM-----  
-----LVALSALI-----VHEQRQKPS-----  
-----KILVFMATQDLVNFHYDVMT---EVLTLQ-----NE---S-----  
-----EEDINGENNGPTDSSNVLLPGLKFKYK-----LHGHM-----T-----  
-----FR-----KA-TA-----AVLIC-----RG-----  
---TDVAA-----  
ID-----IPL-----V-----DLVVQ-----YH-AP-----QIL-----  
---ADYVH-----RV-----GRTA--R-AGHTG--KAVIFL-----  
-----  
-----EP-----AEQEF-----  
-----IQYLT-----  
-----DKHI-----  
---RI-----QEQKIDG-----  
-----I IKNFGLFVNRNQP KPKPINKIHWAYEIQHRYER-----  
-----LIKEDQLFDSAKKA-----  
YVSWVRYSNFQKELRNIFCIKAIHLGHYAKCLGLSEAPKQLLQYHTDTK-----  
----- [459]  
AgI2DIC\_D -----

-----CSSLVSTANDKTTDAVPSSDAMATPP-----  
-----  
EVSKVLESNSTNEPTNQCSAETATNECVAMVE-----  
-----TDEATKSDTMDVEFSLPTSSDEVSGDK-----  
-----EMERIDDDASDIPASSLPDE-----  
-----  
SSHENAVPDKHNGVTITIDDNSDISLNSESASKPPKEKS-----  
-----IESEPIIISIPDNEEDDFRMITPSL-----  
-----LDAIPLSDFQKDATAANETINISDDDDSDKQSAAPAVTIE-----  
-----SQLDGVVELMDEVEDAVGEKQTHDTAEATNAEAVE-----  
-----  
-----DEEEDNANIQSFCEKTL-----  
-----  
LCELDEINSDSDSCVGAWNKDSSTEKEENEQPVVVS LAAGAPTRAEAQQAIDKFEI PAVINPTPFYSDPADVTGKKEVGH  
TVLHVGGNSLNDVEEFNSTIAGLGLSLKHLRYDKLQRTFG-----  
-----  
ENINDVLGPVANGPSSDRMKELLASEGSVAITPSQLPPSRTEASEWIDNRCRKRSEGPADSDSPIKVKPVDTLMTVDDG  
ATPARLPAPKIDSESSLNLSVLVANDGNAAPSSSSTDKTNATMQERTKPSQDCDAIESMMESTEAPNAATNEVKETIA  
PVSSIASSNQSDLEQSNANISSATPSDNTFGFKVDYENLQDAKSKCEYNLTVMSVEIHVNTRGDLRPNPATDPIAAIFY  
RIHNDVP- [627]  
AgI\_hel22 -----DASTGESWIYPVDV-PV-----  
-----RQ-----YQ-----YAITEAA-LFK-----  
-----NTLVV-----LP-----TGLGKTFIAAVVMYNLYRWY-P-----  
-----  
TGKV-IFM-----APT-----RP-----LVAQ-----  
QIEACARVVGI-----PR-----ADTAEVTGRQPRSK-----  
RATLW-----RSR-----RVFFA-----TPQV-----VLADLQ-----  
---GTDPG---PLFP-AN-----QVR-----  
LVVIDEAHKA-K---G---RY-----AYTDVI---RLL-----  
-----YRILEKHLKGFREHP-----  
-----  
-----DSRAIVFCEFRDS-----VAMIK-----RLLSD-----  
-----N-----QPAIR-ANC-IVGQG-----S-----  
-----ANG---VRVP-----QEQ-----IDVIRQ-----  
-----FR-----AG-TI-----NTLIA-----EG-----  
ID-----TCVAE-----V-----DLIVC-----FD-IA-----KNP-----  
-----TRFVQ-----RV-----GRTG---R-QR-VG---RVLMLV-----  
-----  
-----TEG---EEHET-----LKQVLAS-----  
-----KDRTNQQLARSK-----  
-----EILRVLYRSSPRLVPHGLEP-----KC---MKVNMAVLPE-----  
-----

[349]

AmI1DIC\_D

-LVLLEDKLLVRLRET-

GHRVLIIFSQMVRM- - -LDILG- - -EYLQKK- - -HF- - -K- - -  
- - -PFQRLDGS- - -GELR- - -KQALDH- - -  
- - -FN- - -AEGSQDF- - -CFLLS- - -LG- - -IN-  
TRAGG- - -LAT- - -A- - -DTVII- - -FD-SD- - -WNP- - -  
- -QNDLQ- - -AQ- - -ARAH- -R-IGQKNQVNIYRLV- - -

-TKNSVEEEIVERAKQKMVL DHLVIQRMDTTGRTVLDKKNAGTNNNPFNKED-

LNAILKFGAEDLFKDEEDGDEEPTVICDIDEILRRAETRDEGPSTVGDDELLSAFKVASFAAFEEESEPVNQPN-  
DNDDESKDWAEIIPENFRKKVEEEE- - -KSKEMED- - -

-LYLPPRSRKTLLQQINQNS-

EEGEDSGSEIEG- -  
SDDERPKRGRPRVTPRENIKSFTDAEIRRFVKSYKKFPAPLKRLDDIAADAELQEKPMSELRFLGDQLKTRCDTCLSEF  
ESTAKENKGEIEG-  
KGPGRKRGRGPTFKIGGVMVNAKSFSAAVKELEPLEQALPSDSEQRSNWHIDIKLPANFDCDWNSEDDSRLLRGIYQHG  
MGSWEAIKMDNNLKLGDKLLPN-GSKLQLKK- [514]

AmI2DIC\_D

NVDVLKRKLEDRECRIDQLQ-

-NR- - -VGHLEK-





-----FDLIMR-----AK-----SGTGKTLVFCIIISLEMID----I--  
-----DIS-----  
-----  
SVQV-LIL-----APT-----RE-----IAVQ-----  
IAQVFSSVG--CEIKD-----L---KVEVFIGG-LAIEND-----  
KKKVN-----NCQ-----IAVG-----APGR-----IRHLI--DK-  
---G-----FL-K-VE-----NVR-----  
LFVLDEADKL--M--ET-S-----FQKDI---NYIFS-----  
-----VDELIKIFNKVP-----  
-----FKQSLVFSNYQSR---AQSVC---NKINSI---G-----  
-----FT-ATF-IAGNQ-----N-----  
-----LK-----TF-KC---MNKR-----LEAINK-----  
---TDLTA-----RG-----  
ID-----ADN-----V-----NLVVN---LD-LP-----TDA--  
---PTYLH-----RI-----GRAG--R-YGSYG--ISITII-----  
-----  
-----AE-----NEIET-----  
-----  
LKQLLTSVGGSNFYLLKLPLNYP-----  
-----NNIWATSTTEFEKLYAKSNIND-----  
-----  
ENHFDIKPVIKAIISDLSITSVNSLNNVKSEVIDLSNVQDDISESNIDIIIEIRVKY-----  
-----  
NFHSKNIGETSLCYNYVNTDVSSENRIISNIIHDKMHQLDSTQKIHIGNNNIIIESNNVQDKKENVIDDKWDKISTNYNSD  
NSNNSNNSISVELALNDLFKVQKFKSSESYNSSHSSVSKYISSNCQDSC [514]  
AmI\_hel3 -----FPLNDQIYTKSFTPRE-----  
-----YQ-----VELFYAA---KD-----  
-----KDIIVC-----LG-----KNYEQTFLVIKLIQEFAT-----  
-----  
NNRLLSQQGKRSLYIILTDEDKCTIKASYIQQLTDLKVLNIN-----  
-----TLQEIVLLA-----TSKT-----CAQLLADK-----  
-----KILPHQIN-----  
LVIVDECHKS-----INNSQLKFILQITILSC-----  
-----VHRLQLIL-KTYTPFPANNR-DSIKDKFMQSKKLDNCWKSS-----  
-EENCK-----KPPVA-----  
RHMRGITD-PDLLCGVIFVDKAFV---AKVLF---YLLNEI---SMH-----  
-----D-----EELHF--LSP-LY-TI-----  
EKNIDD-----ISYSKDLEIE-----HRKQ-----  
EEVLKR-----FR-----IH-EC-----NILIS-----  
-----TSILE-----  
EG-----ID-----IPK-----C-----NFVMR---YD-FP-----  
---KTY-----QSYVQ-----CK-----SRAR--A-PD-AL--YVLLVS-----  
-----QEM-----

SKEYVWQLAQYHYIEKTLLVKCS - NNEPSEEEENEADMYAAMI PHYKP - - - -  
LDGGDAPKVTFN SAI SLV NRYCAKLP SDFTR LTP EWSIQEMNIDN ILMYICSLR LPINSPVKYIVSSYPMPNKAMARRM  
AALQLCIDLHRKNEIDDNLLPIGKENFKAKPEDAEVPAL - - PDESKVDFS -  
EARPGTTKRRQY YKKTA EAL TDCRPIIGVPSYLYHINLVLSCPLPEEQNTRG - - - RRIYP - - - - - PEESAIG - - - - -

FGIITLKEIPKLC - - - - - PFPIYTRS GEVHVK - LKLTQQT IILNEMQVEKIATFLNYTFTNVLR - - - - -  
LQQYLMLFDPNASSENSYMIVPV - K - - - - - LDEQSD - - - - -

- - - - - IAVDWNFL - ECIYKNRNIGPTKI - - - - -  
- - - - - PEEARKN - FKFDASKYHDAVIMPWYRSQDQPQYFYVAEICT - - - - -

NLNPKSSFP GNDYGT FEEYLLK KYDIQIQNLDQPLLD - VDHTSARLNFLTPRYVNRKGVA - - - - -  
- - - - - LPTS - - - - - SEETKRAKRENLEQKQILVAE - [809]

AmI\_hel4 - - - - - TQNWREL - - PLS - - - - - DSVLKTIEE - LKFTYM - - - - -  
- - - - - TP - - - - - VQ - - - - - AASIPLL - L - KG - - - - -

- - - - - KDVAEE - - - - - AV - - - - - TGSGKTIAFLVPLLEILQ - - - - - K - - - - -  
- - - - - RKEKWKPT - - - - -

EIGG - III - - - - - SPT - - - - - RE - - - - - LAIQ - - - - -  
INEVLQKFL - - NNIPN - - - - - L - - - - - KQILLVGG - TTIAED - - - - -

ADRLK - - - - - AGA - - - - - NIIVA - - - - - TPGR - - - - - LEDIL - - - - -  
SNCKIIN - - - - - LAGY - - VK - - - - - SLE - - - - -

ILILDEADRL - - L - - DL - G - - - - - FSTTL - - - - - DTILLYL - - - - -  
- - - - - FSTMIDFI - - - - - QHKG TN - - - - -

- - - - - L - KYMIFLSTCAC - - - - - VDYFN - - - - - HIVQAM - - - - - LP - - - - - S - - - - -  
- - - - - VQ - - VFA - IHGKM - - - - -

- - - - - KNKR - - - - - HKIFNE - - - - -  
- - - - - FR - - - - - NI - KN - - - - - GILIC - - - - -

- - - - - TDVMA - - - - - RG - - - - -  
ID - - - - - ILE - - - - - M - - - - - DWVLQ - - - - - YD - PP - - - - - CSA - - - - -

- - - - - SNFIH - - - - - RC - - - - - GR TA - - R - IGNEG - - NALLFL - - - - -

- - - - - LETEDAYVDFIKRNQKVE - - - - -  
- - - - - IQQIVLES - - - - - S - - - - -

- - - - - II - - - - - SYEKCLK - - - - -

- - - - - CMRD - - - - - LQKQDRFLFDKANRAFVSYIQAYNK - - - - -  
- - - - - HECNLILRLKDIDLG - - - - -

KLAMSFGLLRMPRMPPELKGKDISCF - -  
EEHV DINSIAYS DKQKEKSRLEK LKIFRDTGIWPKIHKNKRKQTEPWSEAKKKLERQENR - - - - -

- - - - - [469]  
AtP\_DCL\_D - - - - -



RDLEVNTSQRKAKQVESPT-----

STLETTEKDYEESPETHRYLFSSEECASVDTLGNVFMVPLLFPPNVLESNTPLPKTEKQHSCRNTSHIDLVPVDTSEK  
HRQDNISCKLKERFSPDGASETLETHSLVKRNSTRVGEDDVANSVGEIVLSSDEDDCEGLELSPRLTNFIKSGIVPESPV  
YDQGEANREEDLEFPQLSSPMRFSNELAGESSFPERKVQHKCNDYNIVSTTTELRTPOKEVGLANGTECLAVSPIPEDWR  
TPLANL- [741]  
BF\_C1\_D -----

PVGTETYIATRQKPMTKESLG-----

KCVAA-----NVFKE-----

-----GLANRSAHGLRKAATVAAEN-----

GATEAELDAIFGWTDRRMASHYTRNANRKKLAYGGVAKLERKIGSEDHRANVYSLTDKLGAGNRTKSSMKSADVVRKDGGH  
DRDRTCDPYHVKVLSR----- [150]  
BtB\_hel GMENHPLTPMKDANLVRVLQRQTRSKVGLIRHDAIALGTSAV-----RETIDTLRRE-----  
-----GVRIAI-----ADALTDLDLYVLGEACADLPLITG-GSGVALGLPSNFRLG-----

ALLPERGDAAALPAIEGASAVLAGSASKATNAQVAAWRAA-----RPAF-----RIDPLAAARG-----

EPVVEQALAFARLHLPQ-----VKQVQQALGV-----

-----EAAGHLVEATLAAIARGLRELG-----

-----  
----- VR-----KVVVA-----GG-----  
----- ETS-----  
----- GAVVQ-----AL-----GVKALRIGAQIDPGVPAAT-----  
-----  
-----  
-----  
-----  
-----  
-----  
-----  
-----  
-----  
EGSPGATEGSPRETPRAQPLGLALKSGNFGSIDFFEKALRALEGAA-----  
[287]  
BtM\_helm-----AQRASPEPELN-----L-----  
-----RP-----YQ-----LEVAQPA-----L-EG-----  
-----KNIIIC-----LP-----TGSGKTRVAVYIAKDHL-----  
KKK-----ASEHG-----  
-----  
-----  
-KV-MVL-----VNK-----V-----PLVE-----  
QLFRKEFKP--FLKKW-----YHVTRLSGDTQLKIT-----  
FPEVV-----KSH-----DVIIS-----TAQI-----LENSLL-----  
--N-----SEEG--EDDGIELS-----DFS-----  
LIIIDECHHT--N-----K-----EA-----VYNNIM-----RRFLKQ-----  
KLKNNKLLKENKPVIPLPQIVGLTASPGVGGAKKQAKA--EHIKICLIKLRNTIMEQYSRTE-----  
-----GS--ARGIIFTKTRQS--AYALS--QWIIEN-----EKF-----  
-----S-----EVGVK--AHH--LIGAG-----  
-HS-----SEFKPMT-----QNEQ-----  
-KEVISK-----FR-----TG-KI-----NLLIA-----  
-----TTVAE-----  
-EG-----LD-----IKE-----C-----NIVIR-----YG-LV-----  
--TNE-----IAMVQ-----AR-----GRAR--A-DE-ST--YVLVAQS-----  
-----  
-----  
-----G--SGVVE-----RETVNDF-----  
REKMMYKAIDRVQ-----NMKPEEYAH--K-I-LELQMOSI-----  
-----  
-----  
-----MEKK-----  
-----MKTKRSlAQFKG-KPSLINF----- [418] -----

BtM\_helR -----SEVPPT--YSPLK-----P-----  
-----RN-----YQ-----LELALPA--Q-KG-----  
-----KNTIIC-----AP-----TGCGKTFVSLICEHHLK-----  
KFP--QG-RKG-----  
-----  
-KV-VVF-----AVQ-----V-----PLYE-----  
QQKSVFSEY--FERFG-----YKVSGISGETADNIS-----  
VEQIV-----ENN-----DIIIL-----TPQI-----LVNSLK-----  
--D-----GTIP--SLS-----IFT-----  
LMIFDECHNT--N-----K-----HH-----PYNMIM----FHYLDQ--K-----  
LGGSSDSLPOVIGLTASVGVGDAKNTAEA-TEYICKLCLKDLFCFILQEEYHLNP-----  
-----  
-----ETRTILFVKTRAL-----VDALK--N-----NWIEEN-----P-----  
-----K-----LSFLK--PGI-LTGRG-----R-----  
-----TNQTMGMT-----LPAQ-----KCALDA-----  
-----FR-----TNRDS-----KILIA-----EG-----  
--TSVAD-----  
ID-----IAQ-----C-----NLVIL-----YE-YV-----GNV-----  
-----IKMIQ-----TR-----GRGR--A-RG-SK--CFL LTS-----

-----NADVIEKEKLNICQEKMMNESISRLOGW-----  
-----NEAVFKEKIRQIQ-----

-----IQEKLIRDSQGKVKPVVDKKN- [395]  
BtM\_helU -----PTNC-PV-----  
-----RD-----YQ-----LHIARTA--LFC-----  
-----NTLVC-----LP-----TGLGKTFIAAVVMYNYFYRWF--P-----  
-----  
SGKV-VFM-----APT-----KP-----LVTQ-----  
QIEACYRVMGI-----PQ-----SHMAEMTGSTQAFT-----  
RKEIW-----SSK-----RVLFL-----TPQV-----MVNDLS-----  
--R-----GACP-AA-----EIK-----  
CLVIDEAHKA--L-----G-----NY-----AYCQVV-----  
RELVKYTNHFRVLALSATPGSDIKAVQQVIT-----  
LKKLEEVVVEHFKSWNARKTSDKKCD-----  
-----ETRVMIFFSSFRDS-----VQEIA-----EMLLP-----  
-----H-----QPIIR-----  
VMT-FVGHA-----S-----GKSMKGFT-----  
-----QKEQ-----LEVVKQ-----FR-----  
-----SG-GY-----NTLVS-----TCVGE-----  
-----EG-----LD-----IGE-----V-----  
-----DLIIC-----FD-AQ-----KSP-----IRLIQ-----RM-----  
-----GRTG--R-KR-QG--RIVVIL-----









-----ELYRGE-----QSRQSKF-----  
-----E-----NNTEG-NEE-ST-----  
-----AS-----RSEQ-----LEKLAQ-----  
-----FS-----NG-TV-----RVLVS-----TSVAE-----  
-----EG-----LD-----  
VSA-----C-----NLVIK-----YNYST-----NE-----  
IAHVQ-----RR-----GRGR-A-SD-SK-SILITN-----

-----DE-----SLRK-----QEIANME-----  
-----KEKLCEKAIQLAQ-----  
ENI-----

-----SEFQLLINRKSDEIWPRLOSE----- [144]  
CeW\_hell-----RIHLQRQLCL-----  
-----RR-----YQ-----LELCQVA-L-RG-----  
-----ENTIVT-----AP-----  
TGSGKTVIAANI IKNHFETRDRNGQ-----

-----RFKA-LFM-----TPN-----  
-----SMIL-----KQSDSISS-YLDHS-----YQVQIVQGADNLPVR-----  
-----NAV-----QTK-----DLIVA-----  
TPQM-----IVNLCN-----E-----HRDV-LKTENEIGIEQFFLS-----TFT-----  
-----I IFFDECHNT-M-----K-----NT-----PYANIM-----  
REYHTLKNMGNMPDGHHL PQIVGLTASLGTGDGKNV LGVKEHIANLCAMMDVKELS-----

-----AS-----  
KQKQ-----MEKLRK-----FA-----TG-EI-----  
-----RVLVA-----TSVAE-----  
-----EG-----LD-----VAE-----C-----NLVIK-----  
-YNYAT-----NE-----IAHVQ-----RR-----GRGR-A-MN-ST-----  
-CVLVTN-----

-----SI-----PLRD-----  
-----QEGANRD-----  
-----KENMMNQALLKIT-----TNP-----

-----GAFRDAVMAEIGNIWNRIQRE----- [340]

CbW\_hel2 I L K D P T T L S S D S V H L I N L A Y R T I P M P S I H D R K L N N L P E T L N P - - - - -  
- - - - - S Q - - - - - Q A A V S A A - - L N P Q - - - - -  
- - - - - R N L L C I - - - - - Q G P - - - - - P G T G K T R V I A E I V H Q L L K - - - - -  
- - - - -  
K K K R V L I C - - - - - A P T - - - - - H V - - - - - A V Q N - - - - -  
A M D A V R R R M - - C Q D I P P E T V Q K E L C I L N N T R D E F Q D H P S T A K - - - - -  
L E T M E K E L M R S N Q K G Q S T - - - - - K L M A Y - - - - - E C M K - - - - -  
L R C S I Y Q S I Y A P R R A - - - - - I F S T L G T S - - - - - S I Q K L P E Y D W K A D - - - - -  
- - - - - V M I V D E A - - - - - V P A L T T P T C K K L V L V G D Q K - - - - -  
- - - - - Q L P A I V L S D K A V R A N F G M S L M E K L A E E F A K N N I N I L L N - - - - -  
- - - - -  
E Q Y R M N E K I M H W S N E H F Y N N - - - - -  
- - - - - Q L T A H - - - - - S S V S D - - - - -  
- - - - - I T - - - - - L R - - - - -  
D I Y P K I P T N Y I - - - - - A N K P I F M I D M K N F E D - - - - - R S - - - - -  
Q E S F D S N S Y S N T G E L N V V S N Y - - - - -  
- - - - -  
- - - - - V I R L V T D V G V N P K D I A V I A P Y S Q I E K L R N S I S F R V D V N T V D A F Q G Q E R - - - - -  
- - - - -  
- - - - -  
E V I I F C L V R D N D E G S I G F L K E T R R L N V A I T R A K R Q F V L V G N S D M L Q R N R H I K S L Y R Y L K S E N V I Y G P E I F D T F D D I G L P E  
M D K K P Y N F D F H E N - - - - - [ 4 9 1 ]  
CeW\_hel3 - - - - - M V R V R A D L Q C F N - - - - - P - - - - -  
- - - - - R D - - - - - Y Q - - - - - V E L L D K A - - T - K - - - - -  
- - - - - K N T I V Q - - - - - L G - - - - - T G S G K T F I A V L L L L K E Y G V - - - - -  
Q L F - - A P L D Q G - - - - -  
- - - - -  
G K R A - F F V - - - - - V E K - - - - - V N - - - - - L V E Q - - - - -  
Q A I H I E V H T - - S F K V G - - - - - Q V H G Q T S S G L W D S K E - - - - -  
Q C D Q F - - - - - M K R H - - - - - H V V V I - - - - - T A Q C - - - - - L L D L I R - - - - -  
- - - - - H - - - - - A Y L K - - I E - - - - - D M C - - - - -  
V L I F D E C H H A - - L - - - - - G - - - - - S Q H - - - - - P Y R S I M - - - - - V D Y K L L K K -  
D K P V P R V L G L T A S L I K A K V A P E K L M E Q L K K L E S A M D S V I E T A S D L V S I F E I L E M F Q P G F Q T E R L R K E K P E - - - - -  
- - - - - N L S A I I F V D Q R Y I - - - - - A Y S L H - - - - - I M I K A I - - - - - R S W E P - - - - -  
- - - - - K - - - - - F K F L N - - S D Y - V V G A S - - - - -  
- - - - - G - - - - - Q N L A N S D N Q G L - - - - - H K R Q - - - - -  
- T D T L R R - - - - - F H - - - - - K S - E I - - - - - N V L I A - - - - -  
- - - - - T S V L E - - - - -  
- E G - - - - - V D - - - - - V K Q - - - - - C - - - - - N V V I K - - - - - F D - R P - - - - -  
- - - - - L D M - - - - - R S Y V Q - - - - - S K - - - - - G R A R - - K - P G - S T - - Y V V L V D - - - - -

-----  
-----  
-----  
QKDVTAYCSKLPDI FTRLVPHSRIIPVEDRGVTKYCAELL LPINSPIKHAIILKDAMPNKKIAQMAV-----  
ALEACRQLHLKGELDDNLLPKGRESIAKLLLEHIDDEPDEYAPGMTAKVGSSKRKQLYDKKIARALNESLIEPDKDCYIYA  
FELECFREPEPVANPKR---RKFQN-----PTEYEYC-----  
-----FGFLSTKDIPKIP-----PFPLFLRQGNMEVR-  
LTVAPEKTRVTEEQLEQIQYFHNLYLFTQVLQ-----MCKTGNLVFDATVNAPLNTLIVPL-----  
NKSKEG-----

-----  
TYSINMKY-VTEVVANMENMPRV-----  
PTEDVRKGFKNADAYKDAIVMPWYRNVEQPVFYYVADILT-----  
DLRPSSQFPDSNFRTFNEYFIKKYHLEIYDQDQSLD-VDFTSNRLNLLLPRSQQPRRARSNSASSTTSNP-  
VTPSESRESQASGGHSSQRQILVPELMDVHPISATLWNVISALPSIFYRLNQLLSDELREIILQKAFGIQTSRLQ  
[838]

CeW\_hel4 YQEMLKKSSRTFLRFEDFPLS-----WRTLEGLKD-NDYTKP-----  
-----TE-----IQ-----RDTIAYS--L-TG-----  
-----SDVVGA-----AK-----TGSGKTLALVIPVLEALW-----  
-----RAKWSPDY-----

-----  
GLGA-LII-----SPT-----RE-----LALQ-----  
TFSTINA-V--GAHHG-----F---SCGLVIGG-SDVAFE-----  
RNRIS-----GI-----NIIVC-----TPGR-----LLQHM--DE-  
--N-----AQMS--CD-----SLQ-----  
VLVLDEADRM--L--DM-G-----FSKQL--NSIIN-----  
-----INALWSFI-----EAHR-----  
-----KKKSLV FVSSCKQ--ARFLT--EAFSQL--RP--G-----  
-----LP--VMG-LWGTM-----N-----  
-----QKKR-----IETF TK-----  
-----FD-----ES-KA-----AVLIA-----RG-----  
--TDVAS-----  
LD-----FEH-----I-----DWVIQ--VD-CP-----AQI--  
-----DDYIH-----RV-----GRSA--R-MDDSG--NSLLMV-----

-----  
-----SPSQEEAMIGKL-  
EKHSIPIEELKIHDPDAMSDVRVVKLRILAE SQE-----  
LKEYAQKSIVAYLRSIYTMKDKKVFVDVEAIDAAALADSFGLVSVPRVRF-----  
NKKAKKS GEKLMEKEVKEEEEEASLVGKFAIDE-----DDEDIFT-----

-----  
VKKPTGEPEQIKEEEAAEKISNITISKTKPLKAVTKVSAAKKILNKKLK-----  
-----VNTKKTFGAEDDELE-ELEEGPSTITSY-----  
GLDIEKARQEIKSGDKEDRKRFLKLLREQRRQEKLAKKNRRAEEEEAVEYDEDGSEDEP-----

DISWLPDPA----- [584]  
CeW\_hel5 IIIIVKLPDGSSEKFFFNVTKRAFEKIVCVDGKPVQMDSLTP-----  
-----HHSVWCPIH-----  
-----KNIIFA-----YNHLLRMNLQYLF DSETL-----

-----  
SFHETKCDQCHLDPKKSTNVKQILLVAASPKIRRPVILTMSQ-----

-----  
EGRVLKMCYDEIEKKNYVDMSPTEIKA-----

-----  
-----LTQLKDVTAAMEDLTL-----

-----  
-----ESDLIPLVKEKSVFL-----

-----  
-----PHDSILIANKKKTNKIGQYVFDHYHHQFL-----

-----  
-----EVVMSD-----

-----  
IEIKQEMPNIAKLINVTMS-----

-----  
-----TKTEQ-----

-----  
-AISIRCTPGI-----

-----  
GELKKFHYNRETASFDPMEEK-----

-----  
AIVESDEEIQSFIEEIEKTQDIVCKKIKAILWFYHNVKPFLLAKKLENPVKKNNNDYKRYVFKPVEPEEKVDDDEMDSVSEPE

SDSLSMSSSSRSSLSSDDSFEMVVDIDFVE----- [379]

CeW\_hel6 ---VTDTKGVEFEDF---CLG---RDLLMGIFE-KGWEKP-----

-----  
-----SP-----

-----  
-----IQ-----

-----  
-----EASIGVA---L-TG-----

-----  
-----QDILAR-----

-----  
-----AK-----

-----  
-----NGTGKTGAYCIPVIEKIQ-----

-----  
-----P-----

-----  
-----ALK-----

-----  
AIQA-MVI-----

-----  
-----VPT-----

-----  
-----RE-----

-----  
-----LALQ-----

-----  
TSQICVE-L--SKHIQ-----L---KVMVTTGG-TDLRDD-----

-----  
IMRLN-----GTV-----

-----  
-----HLVIA-----

-----  
-----TPGR-----

-----  
-----ILDLM---EK-----

-----  
---G---VA-K-ME-----

-----  
-----NCK-----

-----  
TLVLDEADKL--L--SQ-D-----

-----  
-----FQGIL---

-----  
-----DRLIN-----

-----  
-----VHCLNTLF-----

-----  
-----RKLQ-----

-----  
---INQSIIFCNSTQR---

-----  
-----VELLA---

-----  
-----KKI-T---

-----  
-----YS-CYY-IHSM-----

-----  
-----EI---G-----

-----  
-----A-----

-----  
-----QNHR-----

-----  
-----NRVFHD-----

-----  
-----FR-----

-----  
-----QG-NC-----

-----  
-----RNLVC-----

-----  
-----SDLLT-----

-----  
-----RG-----

-----  
ID-----IQA-----

-----  
-----V-----

-----  
-----NVVIN---

-----  
-----FD-FP-----

-----  
-----RNA-----

-----  
-----ETYLH-----

-----  
-----RI-----

-----  
-----GRSG---

-----  
-----R-FGHLG---

-----  
-----VAINLI-----

-----  
-----TY-----

-----  
-----EDRHT-----

-----LRRIE-----  
-----QEL-----  
-RT- -RIEPIPK-

-----TVDPKLYVADQQLVDAADETTA-----

[338]  
CeW\_DEA\_D

-----LGSLQNIIMEPFTNLDE-----  
TKYSILPICEKPDMSVVTLGVGQD-

-----VNAE-----TQLLQR-----  
-----LGNSS-----LLFFG-----  
ADPIV- -EG- -ND-  
-----ESFSKVGTFPPFAI-----  
-----GNSSKMGKASVLENGVYVDKR-----

VVHVELIEFLKGIIGKTFFDNIWIDGEYAEYELFDYFYNGGKLDKEKITICQFNMEVHLPTLRQQQEFKEFIVRIYNDKR  
YAFFRPVRGNHIRLYFVNFKDPICAKKFISG- [216]  
CfM\_DEA\_D

-----LEMLEQILREQFGHSD-----  
-----SP-----

RGIIFTQTRQS---THSLL---LWLQQQ-----PGL-----  
 ---Q-----TVDIR--ADL-LIGAG-----NS-----  
 ---SQNT--HMT-----QRDQ-----QEVIRK-----  
 ---FR-----VG-TL-----NLLVA-----  
 TSVAE-----EG-----LD-----  
 ---IPQ-----C-----NVVVR---YG-LL-----SNE-----  
 ---ISMVQ-----AR-----GRAR--A-GR-SI--YSFVATQ-----  
 -----  
 -----G---SRELR-----RELINEV-----  
 ---KMDQAEYQAKI---RDLQQAAL-----LETLMERAVAAVQ-----  
 -----  
 -----VKRA-----  
 ---VQAAQRDNQRQQF-LAEQVQL- [204]  
 CfM1\_hel SPALQPLSMAGLQLMTPASSPMGPFGLPWQQEAIHDNIYTP-----  
 ---RK-----YQ-----VELLEAA--L-D-----  
 ---HNTIVC-----LN-----TGSGKTFIAVLLTKELSY-----  
 QIRGDFNRN-----  
 -----  
 GKRT-VFL-----VNS-----AN-----QVAQ-----  
 QVSAVRTHS--DLKVG-----EYSNLEVNASWTKEK-----  
 WNQEF-----TKH-----QVLVM-----TCYV-----ALNVLK-----  
 ---N-----GYLS--LS-----DIN-----  
 LLVFDECHLA--I---L---DH-----PYREIM---KLCENCPSCP-----  
 ---VIKLEIL-RKYKPYERQQF-----  
 ESVEWYNNRNQDNYVSWSDSEDDDEDEEIEEKEKP-----  
 ETNFPSPF-----TNILCGIIFVERRYT---AVVLN---RLIKEA-----  
 GKQ-----D-----PELAY--ISS-NFITG-----  
 ---HGIGKN-----QPRNKQMEAE-----  
 -FRKQ-----EEVLRK-----FR-----AH-ET-----  
 ---NLLIA-----TSIVE-----  
 ---EG---VD---IPK-----C-----NLVVR-----  
 --FD-LP-----TEY-----RSYVQ-----SK-----GRAR--A-PI-----  
 SN--YIMLADT-----  
 ---DKI-----  
 KSFEEDLKTYKAI EKILRNKCSKSVDTGETDIEPVVDDDDVFPPYVLRP--DDGGP--  
 RVTINTAIGHINRYCARLPSDPFTHLAPKCRTRRELPGDT---  
 FYSTLYLPINSPLRASIVGPPMSCVRLAERVVALICCEKLHKIGELDDHLMPVGKETVKYEEE---LDLHDEEETSV---  
 --PGRPGSTKRRQCYPKAIP ECLRDSYPKPDQPCYLYVIGMVLTTPLPDELNFRR---RKLYP---PEDTTRC---  
 -----  
 FGILTAKPIPIQIP-----HFPVYTRSGEVTIS-IELKKSFTLSLQMLELITRLHQYIFSHILR-----  
 LEKPALEFKPTDADSAYCVLPLNV-----VNDSST-----  
 -----  
 -----LDIDFKFM-EDIEKSEARIGIPS-----  
 -----TKYSKETPFVFKLEDYQDAV IIPRYRNFDQPHRFYVADVYT-----  
 DLTPLSKFPSPEYETFAEYYKTKYNLDLTNLNQPLLD-VDHTSSRLNLLTPRHLNQGKGA-----  
 ---LPLS-----SAEKRKAKWESLQNKQILVPE- [858]



CiV\_hel -----  
-----RD-----YQ-----LSITKTA-LFK-----  
-----NTLVV-----LP-----TGLGKTFIASVVMYNFYRWF--P--  
-----

QGKI-IFI-----APT-----KP-----LVAQ-----  
Q-----

-----SG-VY-----NTLIA-----  
TCVGE-----EG-----LD-  
-----IGA-----V-----DLIVC-----FD-SH-----RSP-----  
-----IRLVQ-----RM-----GRTG-R-KR-NG-KIVMLI-----

-----TEG-----KEERV-----NI-----

[125]

CiV\_DIC\_D -----

TTCGITFSTSLIKFKTYFLLFFLQIHTF-----  
-----MT-----RVEQ-----EDTISS-----  
-----FR-----DG-ST-----KIIVA-----  
TSVAE-----EG-----FD-  
-----IPA-----C-----NLVIA-----YNYST-----NE-----  
-----IGHVQ-----RQ-----GK-----

[85]

CjB\_hel SDLTLLAQNGKIDPLIGRKFELERMMQILSRRKKNNPILIGE- - - - -  
- - - - - AGVGKTAIVEGLALAIAKKKVPK- - - - -

NLQNAKIFSLDMASILAGTKYRGDFEKRIKEILNELEKIPNA- - - - -

ILFIDEIHTIVGAGSTGESHTDFSNLLKPALSNG- - - - -  
- - - - - FMEYKNTFDKNKPLSRR- - - - -

- - - - - FAKINVDEPSQEESLQILKGLKNKYEEFHHLN- - - - -

- - - - - AVIWG- - - - - DEILQY- - - - -

- - - - - KKFFN- - - - -

DKFLPDCAID- - - - -  
LIDELGASFALNPKAKKNVNLKDLENVLAKMTHHHKMF- - - - - FD- - - - -  
QNKALMNLKTNLKAKIFG- - - - -

- - - - - QDEVIDSLVSSLKQSFAGFKNSNTPRGVFLFTGSSGVGKTELCKSLAEFLGL- - - - -

NLERFDMSEYAEKHAI SKLIGSPAGYIGFEEGLLSNAIRKNPFSLVLFDEIEKAHPDLSNTFLQIFDNAELTDNSGLKV  
DFKNTIIIMTSNLGLKESNELGFLSKNEEKSNRAIKDFFAPEFINRIDKILHFNDLNDTILVKIIEKELDEISKNLNNIK  
LSVDDKAKIYLAKKAYNKEFGVRLKRIISEEIGEKISDEILFGKLLKGGIAKIKLGKNGKLEFIF- [555]

CbE\_hel DDMGDVLAPAPRDFNAPYGPQQLPSKATINTYIYPTNH- PK- - - - -  
- - - - - RD- - - - - YQ- - - - - FEIIRNC- - FLD- - - - -  
- - - - - NTLVA- - - - - LP- - - - - TGLGKTFVAGVVMLNFYRWF- - P- - - - -

TGKI- VFL- - - - - APT- - - - - RP- - - - - LVAQ- - - - -

QIEACQLSCGI- - - - - PS- - - - - RDAAIMTGEKGARKG- - - - -

RERLW- - - - - EEK- - - - - RVFYC- - - - - TPQT- - - - - LDNDLK- - - - -

---N-----GAVD--PR-----DIV-----  
LVVLDEAHKA--T---G-----NY-----AYTTIV----  
AYITAHHPYFRVLALTATPGADVEKVQNVVDALHISRIEIREAEAPEIRKYMNTKHMQKALELMLAHFSQAEEEEENTLGO  
KN-----NTRAMVFCSLRPC---VMELV---DMFNE---  
-----H-----PNLLR--ATK-FVGQS--  
-----NG-----KDERDKGFN-----  
QKEQ-----KKTINE-----FK-----AG-TF-----  
-----NILVS-----TSIGE-----  
-----EG-----LD-----IGE-----V-----DFVVL-----  
-YD-MP-----RQS-----IKLLQ-----RI-----GRTG--R-KR-DG-  
-IVHVL-----  
-----SEN--REDMN-  
-WDTAQQT-----  
-----HRDIQEEILHSR-----NLELFEDVEPLIPDRKMP-----  
-EC-----LEQVMPVDPWNPDDP-----QYKKMM-----  
-----DEGEKELR-RMQRAHQPPASRKK-----  
-----KKPMVNEVPENARGFTSVRDLLREADKVLLRPDTEGEDEDA-----  
GGGKSKGKGGKAKAKDPSAPKIKHRARKRARTPSPI-QTESEDGEDQSLEALFAVQEK-----  
EDRTEKPSTKRKAPVAKV-----ALVTKRPRKSS-PGLSTSSLA-  
[605]  
CpB\_top\_D -----

TSFVVVHVNAIRKCHVGGYIKGYFKPYLV-----  
-----MLPLNLMERIIFPVSLALRL-----  
-----FG-----NMLAA-----  
-----TLLIDLMYS-----  
-----GLAHIGWIAQLGVPIVAHGFF-----

-----  
-----  
-----DVFDGTIQMIVFTMLTMVNIKMTAEH-----  
-----

[112]

CrA\_hel -----DGWVEHELIKPRSI-EK-----  
-----

-----RR-----YQ-----ISIASVA-RQK-----  
-----

-----NTLVV-----LP-----TGLGKTTIALLLIADTLK-----H-----  
-----

-----  
-----  
-----GGRA-LFL-----APT-----RV-----LVHQ-----  
-----

-----HYNFLKEHILH-----DGI AVL TGNTPRHE-----  
-----

-----RIEVW-----NSA-----SVVCS-----TPQV-----TLNDIE-----  
-----

-----R-----GLID-AG-----DFA-----  
-----

-----LLVFDEAHRA-V-----G-----DY-----SYGRIASLLADAS-----  
-----

-----LSRLVEILRREGFSSDEGYYSISSSSNNSNYR-----  
-----

-----RGKALIFTSYRDS-----VEVIT-----SRLI-----  
-----

-----AEGFK-VGY-LIGT-----  
-----

-----GEYGLR-----QEEQ-----VEVVER-----  
-----

-----FR-----AG-EY-----SILVA-----EG-----  
-----

-----TSVGE-----  
-----

-----LD-----IAE-----C-----NLVIF-----YD-NV-----PSA-----  
-----

-----IRFVQ-----RK-----GRTG-----RRMPG-----KVIVLV-----  
-----

-----  
-----  
-----AKD-----TIDEA-----YHWISRK-----  
-----

-----KVRQVR-----  
-----

-----SIVSIVNR II ANRSGKD YRSN----- [340]

CsV\_DIC\_D -----  
-----

-----MT-----KVEQ-----KNAMDD-----  
-----

-----FR-----SG-RT-----KVITA-----TSVVE-----  
-----

-----EG-----ID-----  
VPS-----C-----NLVIS-----YNLST-----SE-----  
VAKVQ-----RE-----GKVL--L-CM-TL--MHIHIK-----

-----VY-----ILFK-----KGRARAG-----  
-----KSR-----

---SILLTYEDSELIERDQNN- [104]  
Dde1\_hel IFQDENCNNLTLGQIKTIGMPIIKTLQOGDDGKPMEMNKSQP-----  
-----RD-----YQ-----CELYRKS--M-E-----  
-----KDIICC-----LP-----TGLGKTLISCLVIKMKMQ-----

LNPSKQI-VFI-----VDR-----IP-----LVIQ-----  
--QSDVIETET-----GLKVLSAHGETFKPVQ-----  
-LKQRF-----DVLVV-----IGDL-----FNKLLS-----  
--N-----GDLN--IL-----SFC-----  
LIVIDEAHHI--V--K-----EH-----SFAKLL-----  
RDKLNTIPEICHPKILGLTASPAGKKDFFNTLLSLKLIKVSRC EIIKPTNQSIIPLEIALQILDEKKS-----

-----DLKAIIFVKTRDV-----AKKVY-----SLLDQL-----  
-----RMGDRFSFIKPNLVVGHG-----  
-----SIGGMS-----  
ISSQ-----KKAIEE-----FR-----SD-QC-----  
-----NVIVA-----TSVVE-----  
-----EG-----FD-----VPE-----C-----NIVIR-----  
-LD-PP-----TTV-----TANIQ-----SR-----GRLR-----  
NRDSYFYGIVKVD-----

DPREDNIYEFFKNQERYL-----  
-----EEAINFLKTGELP-----

ISLKQQNYTTQVNQVDEEMDTNSYFASASALVQEMVIQVKRHTFDFGIAWEHTPDGSGFFNAIATFYINKEAAHSHFKSG  
QNKKTAKENTCKSILQSGLIYNLIKLE----- [502]  
Dde2\_hel  
TTTTTTASTTIPSATSILKNSTTSNTSTTTTATTKPPIINLDTISPPLOQQQKLNVTLPILKTPQINKPLQPSLPTKPPI  
KNNTTLPTTNKSPTTTTTTTTKFIDKFKGMKRYTKDLPEGFEISSENQEPYRNEKMIGEFLYPEDNIREYQFKFIQSAFLE  
NTMIC-----LP-----TGLGKTFIASILMLNYHWFPSKLVF-----



DDKDLKILNLSSSENLLNNSINQILSNRERQAITKNQFLNWKKLNINNEYFINNQLDGGPLDKDIKCVILSIYHIEIDIE  
TFRELLLFQLPDIVNQVDQVSIRMEGDDEYLSSSIIVILNTCIDKEQSIYRLKSLNINGLKYWMIDRSSFHEDDNIDN  
DNNNSYDRENEQDNFNFYFINEYTHDLSQFKNKNYSIGSFEYGNM-----

SSPTKYHGIGQLDDSFDFLYGNREMFFTKTRFQRYRLNLKLTDIESTFLLVNDKYQNIHVILLIVKRPLIFEEKETH  
RVFWNKSKPKKDDFGQAFV-----YRLTLST-----

-----IDNEIKEV-  
IKPLIANGFRMYESSLELNCFIQGGINKNNNCMIIDLNLQYIKRNLEIHYLLQCLQSQSSYGRVLNQDFIVEINNLLAFG  
KQEEAE-----FIITSLISKRTKFINYKEFIGDCLKNFLPDPYYAKK-  
DLSTKSGEFTMIRDVFITPSRTIFIQPTLQSCRAVRKFGSSNFIMVKIVNESLEPLQGVNNKHPLHENRIKPILEGGIL  
VGGKIYSYAGNSNSQLREYSSWFVSNQIGTH- [904]

DmI1\_hel -----KP-----  
-----RG-----YQ-----LRLVDHL--T-K-----  
-----SNGIVY-----LP-----TGSGKTFVAILVLKRFSQ-----  
DFD--KPIESG-----

GKRA-LFM-----CNT-----VE-----LARQ-----  
QAMAVRRC--NFKVG-----FYVGEQGVDDWTRGM-----  
WSDEI-----KKN-----QVLVG-----TAQV-----FLDMVT-----  
---Q-----TYVA--LS-----SLS-----  
VVIIDECHHG--T---G-----HH-----PFREFM---RLFTIAN-----  
-----VQRFLMSLKVSFADKDPK-----

-----DICCLVVERRYT---CKCIY---GLLLNY---IQSTPE-----  
-----L-----RNVLT--PQF-MVGRN-----N-----  
-----ISPDEFESVLE-----RKWQ-----KSAIQQ-----  
-----FR-----DG-NA-----NLMIC-----  
---SSVLE-----EG-----  
ID-----VQA-----C-----NHVFI---LD-PV-----KTF-----  
-----NMYVQ-----SK-----GRAR--T-TE-AK--FVLFTA-----

DKEREKTIQQIYQYRKAHNDIAEYLNKDRVLEKTEPELYEIKGHFQDDIDPFTNENGAVLLPNNALAILHRYCQTIPTDAF  
GFVIPWFHVLQEDERDRIFGVSAKGKHVISINMPVNCMLRDTIYSDPMDNVKTAKISAFAKACKVLYSLGELNERFVPKT  
LKERVASIAADVHFEHWNKYGDSVTATVNKAD--KSKDRTYKTECPLEFYDALPRVGEICYAYEIFLE-----  
PQF--ESCEYTEHMYLNLQTPRN-----

-----YAILLRNKLPRLA-----  
EMPLFSNQGLHVRVANAPLEVIIONSEQLELLHQFHGMVFRDILK-----IWHPPFFVLDRRSKENSYLVPLIL-  
-----GAGEQKC-----

-----FDWELMTN-FRRLPQSHGNSNVQQ-----  
REQQPAPRPEDFEGKIVTQWYANYD-KPMLVTKVHRELTPL-----  
SYMEKNQQDKTYEFTMSKYGNRIGDVVHKDKFMIEV-  
RDLTEQLTFYVHNRGKFNASKAKMKVILIPELCFNFNFPGLDNLKLI FLPSILNRMFLHAEALRKRFNNTYLNHLHLLP  
FNGTDYMPRPLEIDYSLKRNVDPLGNVIPTE- [842]  
DmI2\_hel -----VKTFEEL---RLY-----RNLNGLKR--NNFVTP-----  
-----TK-----IQ-----AAAIPMA--L-AK-----  
-----MDLIIQ-----SK-----SGTGKTLIYVIAVVQSFN---P---  
-----NIN-----

QPHA-MIV-----VPT-----RE-----LAIQ-----  
VQDTFFHLC--KSFRD-----F---KCSAFIGG-TDVAKD-----  
RKRMN-----ESR-----VIIG-----TPGR-----LLHLY--EN-  
--R-----VF-D-VS-----KLR-----  
LLVLDEADQL--Y-QTKS-----LQHTV--SKLIE-----  
-----LQILGQIF-----NQLP-----  
-----YEQAII FASSQMR--ADSYK--NYL-T-----AS--G-----  
-----ID-CHL- ISGAM-----E-----  
-----QSER-----LHVFEG--  
-----YR-----NF-TM-----RILVA-----  
--TDLMA-----RG-----  
VD-----SPH-----A-----NLVIN--ID-PP-----QDH--  
--VTYLH-----RI-----GRAG--R-FGSKG--IAITFI-----  
-----  
-----A-----SK-----KESQR-----  
-----FREMS-----  
KKIATAWSVLEFPKEPMPNEFNFWDFEKYNFDYI KEENPLQEMPMP I KENR-----SKENVDA-----  
-----SSVDLENLQKDQDGKRRDPDKLPVA-----LE-----  
-----NVETQKELELENLPE-SSHNNKNLR-----  
VKEKEIVRQGLKETNSKAGGSKTNKTERRKKSNTPSKLOKQITEVQQTPEITV NKYYMQEDIQRTADGKEYHPVNGAG  
[490]  
Dm13\_hel-----RSGF-----N-----ATILQOLED-QGYDGP-----  
-----TP-----IQ-----AQTWSIA--K-EG-----  
-----KNIVMI-----SG-----KGTGKTLGYLLPGIMKMH-----  
-----NQRGLMQHKK-----  
-----  
GPIV-LIL-----VDC-----RE-----AAVM-----  
VQREVLYYT--NPL-E-----L---RTHCLLGN-SQWQGH-----  
AEC-----DLLVA-----SAGR-----LLQMID--NK-  
--K-----HVVE--LE-----RCT-----  
YLVL DNIDRM--I--DVG-----LEGNI--CRLLC-----  
-----VERLMKELTAIYDTSDI-----  
-----PGKVVIYVKRQKVVEELVDLIR-----  
-----NCVPCEGIHGGR-----T-----  
-----AQEN-----QGI IHD--  
-----FG-----TG-AY-----NIIVA-----  
--TQMTS-----NC-----  
LD-----VPG-----I-----RYVIN--YD-FP-----DNI--  
--DKYVQ-----RM-----SRTGCLS-YNRNC--EVISFF-----



TMANYKLVTEVVDFLKICKQEIGPHLLQLAEEKMFGPRQRRRHRPQRYNRMH--

[343]

DmI4\_hel -CRLCLRCLSPGSAVFLFETDDTLAETRLVKMIAKFLQLEIL--

PDDGISTSVCTECCHELFDFNGFWQLVEQKQCS--

-LKKEFLTVDVDCAAMKWTGGVDVDVNIDELPLAAGDMDEKPL--

DLHNLSELLGSVLDVNVDSVEVREPIKEQLPCEEEDEKPC--

-LQASDSEPEVTEGQPESSEDSSDD--

-LVRLKSKMKP--

-KRKTSARSSKDQGPISLQQELADLLDDGG--

KRRR--RKAPDQ--

-RTTTE--

-SQESE--

-LQ--

AVLERKPK--

GCSRAQLAKSYEKAIASYMSA--

SCDLCEFSAPYLSELKTHFLEVVHQREYYIKCCGKVFTTRASKLMDHIRKHINPKLFTCTICKKSLNSQDYLATHIETVHNK  
VAQIGKVLKFCPCPCERTF--

SSERRMANHLAKHDTDQLEHTCEICCKSFANVHRLRRHIQSIHEDLHRHVCDICGKKFKFKPSFERHLLQHGVVAPAVE  
CPICRVWLKNEHSLRLHRFTHDSTDTVCPHCGKTCTSRRTALRGHVKYAHKLTNLQCTFCEKTFKQQORNLDEHMAIHTGL  
QLYNCPHCPKECRSRSNMYVHIKQRHADWELRAKMARSHNPQFKPADV----- [577]

DmI5\_hel EQPLHLHHYGRSKYDDEEPTDLSQKGGCSSDTSSVGTPTP--

-RAQRTMPNLIPISKGA--

-KDVLNL--

-SKETNASRSSLTEIASMFF--

NEKQISEMLDKSDVPQLSPATTVASQNSTRSQLTKKSSFMDKDKTG--

QHENLVCQCGHVAKCLSESI IHGKSCHAS--

-AVIIDEDEAGLHEDDGDRLRIDEDDEDHSHSALNLSVTGSTRCQHCRHRCKSSTD--

NSSLKKVYKCPHCSFWASTASRFVHIVGHLNKKPFECSLCSYRSNWRWD--

ITKHIRLKTIRDPSHKTAKVLMNDETGRRNYTKYNKYITLMKVTEEDGDPKLMKSGEMTPNQVASLAF LKDYAKVGSVSG  
QDITLEPVLPNKPNVLDDAHLADNLIRI PLLATMMNAAMA-

---QQQH---QQQQK---

EHQSTMITPSVTISPVKRSNQASVMQGKPSDDLITEVHQ-

---EGNEKRTVYRCRKC NFGHQNR-

-DAVLAHVKIHYQDASYPKSNSGNSSTSPLQVSVGGSPQFY-

MNKVFAAMCLSQTQSQSSPNSGSAGTSPAISAGLL-

QRAIQEAQHSPTPNASALSGLALALAGGKQANTTKASAASILEHGEQKASQNEAS-

ADSLTSPNTTTTNSTTSRTTKD TTARSLQDLLTSPRSARNGNHPSNANSNSVVGNGLR LLDVAVVASSTNNTTTPPPPTN  
SVSKPNASPLPVTTPPISTATPLAHLGAGNHRSSSS-

HHNDQNHAPP SHMAGDGCHLASGLTHAHI INTNTKANPSSNSFPSSSSSSSSSSMASTSSAAGSASASASSTTSSPPPPA  
ASSASAYMAAMAPQKHVPTVAQM SHPQTRFHSHPGSPSLLT MADGDRREPSPYRCGHCHQVSNWKHVIQRHCRLKHSG  
DIRIETL ERGASVSANAPPIYRPLGAGASNESQSHIHNP SNPITSNILKSGSNTNANSNINSNSAQPLLLTTKQLEQIFH  
TPLSASAAAVVNAANTQQDIQAAAAYWAAACKAVVANSSAEELLQLQON- [995]

DmI6\_hel ---DMATGHNWIYPNNL-PL-  
---RS---YQ---QTIVQSA--LFK-  
---NTLVV---LP---TGLGKTFIAAVVMYNFYRWY--P--

KGKI-VFM---APT---RP---LVSQ-  
QIHASQKIMPF---PS---EDTVQLTGQLPRPK-  
RAELW---ASK---RVFFA---TPQV---VHSDML-  
---EADGE---CSFP-FG---SIK-  
LIVVDEAHRA--K---G---RY---AYTQVA---DCL-  
---YEKLRQVLVQH FQANP-

---DSRAIVFCEYRES---VMLIH---RLLLQ-  
---H---RPVLR---PRC-FVGQG---S-  
---TVGASYALT---QKQQ---LQIMTD-  
---FR---SG-TS---NVLVA---EG-  
---TSIGE-  
LD---VGE---V---EMIVC---FDICS---TNP-  
---TRFIQ---RI---GRTG--R-KK-NG--EVMMLV-

---TEG---REQQV---LKDVLAN-  
---KDQINKKLLNSS-  
---VVKLSLYEQNPRMVPSKFQP---KC---EEKHMEPV-

---AE-EKPKPKSAAKTES-

RKRKQPVAQTGSLRKYFKESPPTES-

QQGILQGIKPYQMSEASQQLVKQQVLRRSV-TLKNFFGESQASSTLTSSQEDVQRLRKLTR---

LLQSSKPFVSDSKDLM SH-----LQDDHLPRQIK-LYLLKSNPEF

[490]

DmI1DIC\_D -----

-----ITGIGHTLNSSPGNELPP-----

KSPTQMGMGGGMGGPGLGAGLTGA-----

-----SSSNARGGGDNRS GSEILDR-----

-----QSTDV-----KLEKS-----

-----NIIML-----

-----GPTGSGKTLIAQTI AKCLDVP-----

FAICDCTTLTQAGYVGEDIESVISKLLQDANYNVERAQTGIVFLDEV DKIGAVPGIHQLRDVGGEGVQQGMLKMLEGTVV  
NVPERNSPRK-----

LRGETVQVDTTNILFVASGAYTGLDRLIARRLNEKYLGF GMPSTSGSGRRAAQAASPM DNDQEERDKCLTKVQARDLVE  
FGMIPEFVGRFPVIVPFHSLNV SMLVRI LTEPRNALVPQYKALLGLDEV DLTFTEDAVKSIAQLAMERHTGARG LRSIME  
QLLLDPMFIVPGSDIRGVHITADYVKGSATPEYSRDADAAASGT VATDSDTTT DNDKNFENSEKVRLKQ-----

[417]

DmI2DIC\_D -----

-----ANSMMHDSNL-----

TFKVMLHRAQMRHRKLNVD RVG-----

-----KSQP-----LAATLL-----

-----DLLVE-----

-----FIVSHLMKKFPM-----  
ELYLLCIGVIHRILC-----YQ-----KRCRVRLNYPWKELWSALIGL-----  
-----  
-----  
-----  
-----  
LRFLVNQEQTIVKKNIFHLSLQVNIIFNLFITYGDTFLATTNSYDELYYELNREEKVFTEIHAMVLRYYTTPDCEYKDD  
VIKLLNALVNI LAIVKHFQ-----  
-----  
-----  
NKI KEWLAEQGLSTPTEEQILDVVRKNYDLTLKLDQSLDQYERYTETPLHTNFFKLMVRDVVNDTRKHIYGYVKEAVSVI  
PDQEILLSSSMTSVSAGTATPASATAVPEAKALPSFA----- [313]  
TcI\_hel -----CYLNENVYTHFTPRE-----  
-----YQ-----VELLDSA-----KK-----  
-----RNTIVC-----SS-----  
ASSAKAFITIKLLQEF SHKMRVPHG-----  
-----  
-----  
-----KQALFVLDGPNVPIMTSHVLLTDLTVT SIDKEENPPSLKAS-----  
-----NVIVT-----  
TAEVC-----VLLCCKNFVHLD SYA-----  
-----LIVIDCLYGGQOSLV-----  
REIMARYQA-----VLRFLQVL-KQFKPTG-----DK-----  
-----PETCDKLPDLKDP-----  
KKGKGNKYK GPR-----RPYISRAQSDEMLCALVFVKNRYK-----AEALF-----ALLCVM-----  
-----SKS-----D-----EEYWW-----VSV-SF-SV-----  
-----NKIADP-----VREPREAESE-----  
-----HKRQ-----EEVLRK-----YR-----SH-EC-----  
-----NIMIA-----TSALE-----  
-----QG-----CD-----LPK-----C-----  
NLVIR-----FD-LP-----QSF-----HSYIH-----SK-----ARAR-----  
A-NE-AH-----FLLLANE-----  
-----NEV-----  
-----SDFVENLAEYNEVENTLLKRCY-SLEPDKNEELVADASSLQCRPYQPSA-----EPGAN-----  
SVLSNAIALVNRYCAKLP SDTFTRLTPIWHEEKVENG-----  
YIC SIRLPINSPVKKTVTSPPMINTLLARRAAAFMICQLLHKAGELDDNLQPIGKENFKVNEEDWNSSALEESDEENL-----  
-----DPRPGTTKRRQYYYKKVADALLDCHPIIGQPTYFYKIVMKLTCPLPEEQNTRG-----RKIYP-----PEDSPQG-----  
-----  
FGILTSKEIPKIS-----AFPIFTRSGEVSV D-LQLCSQ-LIVTENQICKIREFLNYTFTSVLR-----  
LQYLTLFNP DASANSYLIVPT-I-----DGAT-----  
-----  
-----TTVDWDFI-DLIYANLTVLPEII-----  
-----PEEVRS-YEFDPEKYRDAVVMPWYRNQDQPQYFYVAEICS-----  
NLNPASDFPGSDYATFEEYYLRKYSIQIQNK SQHLLD-VDHTSARLNFLT PRYVNRKGVA-----  
-----LPTS-----SEATKRAKREKLEQKQILVPE----- [796]  
DmI7\_hel -----FHWCDNNLHTTVFTPRD-----  
-----FQ-----VELLATAYE-----  
-----RNTIIC-----LG-----HRSSKEFIALKLLQELSRARRH-----  
-----  
-----

```

-----
GRVSVYLSCEVGTSTEPCSIYTM LTHL TDLR VWQE QPDM QIP-----
-----FDHCWTDYHVSIL-----RPEG-----FLYLLETR-----
----- ELLSSVE-----
LIVLEDCHDS-----AVYQIRIRPLFENHIMPA-----
-----VRLLQTL-----
RCFKPEEVHTQADGLRRMRHQVDQADFNRLSHTLESKCRMVDQMDQPPTETRALVATLEQILHTTEDRQTNRSAARVTPT
PTPAHAKPKPSSGANTAQPRTRRRVYTRRHHRDHNDGSDTLCALIYCNQNHT---ARVLF--- ELLAEI-----
-----SRR-----D-----PDLKF--LRC-QY-TT-
-----DRVADP-----TTEPKAELE-----
-----HRRQ-----EEVLKR-----FR-----
--MH-DC-----NVLIG-----TSVLE-----
-----EG-----ID-----VPK-----C-----
--NLVVR---WD-PP-----TTY-----RSYVQ-----CK-----
GRAR--A-AP-AY--
HVILVAPSYKSPTVGSVQLTDRSHRYICATGDTTEADSDSDDSAMPNSSGSDPYTFGTARGTVKILNPEVFSKQPPTACD
IKLQEIQDELPAAAQLDTSNSSDEAVSMSNTSPSESSTEQKSRRFQCELSSLTEPEDTSDTTAEIDTAHSLASTTKDLVH
QMAQYREIEQMLLSKCA-NTEPPEQEQSEAEERFSACLAAYRPKPHLLTGA---
SVDLGSAIALVKNKYCARLPSDTFTKLTALWRCTRNERAGVTLFQYTLRLPINSPLKHDIVGLPMPTQTLARRLAALQACV
ELHRIGELDDQLQPIGKEGFRALEPDWECEFELEPEDEQIVQLSDEPRPGTTRRQYKYKRIASEFCDCRPVAGAPCYLYF
IQLTLQCPPIPEEQNTRG---RKIYP-----PEDAQQG-----
-----FGILTTRKIPKLS-----AFSIFTRSGEVKVS-
LELAKERVILTSEQIVCINGFLNYTFTNVLR-----LQKFLMLFDPDSTENCVFIVPT-V-----
KAPAGG-----
KHIDWQFL-ELIQANGNTMPRAV-----PDEERQA-
QPFDQPQRFQDAVMPWYRNQDQPQYFYVAEICP-----HLSPLSCFPGDNYRTFKHYLVKYGLTIQNTSQPLLD-
VDHTSARLNFLTPRYVNRKGVA-----LPTS-----
-----SEETKRAKRENLEQKQILVPE- [1037]
DrB_tn3_D
-----
-----QNALATALREMGRIEK-----
TIFILDYISSEDMRRKIHRILN-----
-----KGEL-----MNSLAR-----
-----AVFFA-----
-----KR-----GEMRERDLQDQLQRTSALSII-----
-----
-----
-----

```

MNSVSVWNTTYLEKAI EYLKSKKQFDDSLLRHISPLGWEHINFIGDYFNAKNVPEQNTLRPLNVNPN-----

[144]

DrV\_heM\_D

TQASISNTSQIQLTRPCSTT-----

-QSSG-

-NIQVP-

-KKEVKDLDTSEKFPVQDTNLP-

LRQERTFQGPEETS DPIANEVPTGKVLEQGWNHTMQDCGPPGTEFDIPAKSKQCKTPSSKLV-----

[112]

DrV\_heR\_D

-DDSSASKREIK-

-L-

-RD-

-YQ-

-MEVARPA- -L-EE-

-KNIIVC-

-LP-

-TGSGKTRVAVFITKEHLE----

RKQ- -RMGQKG-

-KV-VVL-----VNK-----V-----PLVE-

QHYKAEFGR- -FLKHQ-----YSVERVSGASQLKIS-

FPQII-----EKN-----DIIIC-----TAQI-----LENSLA-

-K-----AKNG- -DEDGIELS-----QFT-----

LMVIDECHHT- -K-----K-----GG-----VYNHIM- - -IRYLKQ- - -

KNRNQLLKKQDKTLVPI PQILGLTASPGVGGAVSQMAEEHILQLFPLAQLKTIILKEFSTRE-----

-----KA--RGIIFTQTRLS-----AIALC-----QWIEEN-----PKF-----  
-----D-----EVGVR--ASY-LIGGG-----  
-DQ-----SVVKPMT-----AAEQ-----  
-KDVLKR-----FR-----TG-EI-----NLLIA-----  
-----TTVAE-----  
-EG-----LD-----IAE-----C-----NVVIR-----YC-LV-----  
-----TNE-----VAMIQ-----AR-----GRGR--A-ED-SS--YTLVAEA-----

-----G-----SGVAE-----RESVNEY-----  
REKMMSKAIKVC-----KMNRADYEK--K-R-HMSVFARISISSSGHSAPKCLTCALYEDRCQ-----  
YNSAYFSLNASYFRMDCYETQVLE-----DNKKLE-----

-----NILTTELL-MPTKKRGTCLKIAGF-----  
-----DLWYQMMFPPNFDSSKKYPLLIDVGVFKPLNTGQVKGFHSL-----  
FFYPTGGYTYRGRVSMSPEAHLQTQIIARLDKSEKPF-  
GMAFVRLMKSDGTTLDPDGKHELIVYKVDGKKADDAKTYLSLPGTYTEVEEK-----  
-----ERQTGKSFHHGGAVPVTKDSF- [620]

DrV1DEA\_D

-----LAQLKTIILKEFSTRE-----  
-----KA-----  
RGIIFTQTRLS-----AIALC-----QWIEEN-----PKF-----  
-----D-----EVGVR--ASY-LIGGG-----DQ-----  
-----SVVKPMT-----QAEQ-----KDVLKR-----  
-----FR-----TG-EI-----NLLIA-----  
TTVAE-----EG-----LD-----  
-----IAE-----C-----IAE-----NVVIR-----YC-LV-----TNE-----  
-----VAMIQ-----AR-----GRGR--A-ED-SS--YTLVAEA-----

-----G-----SGVAE-----RESVNEY-----  
-----REKMMSKAIKVC-----  
--KMNRADYEK--K-V-----

[172]

DrV2DEA\_D

DEMDAIPMSSS - - - - SDSLS - - - -

TASDE -  
LDARASLPTPS -

- - - - DILVS - - - - YSTFP -  
- - - - GYVSWRDTEAGSWYVENLDRV -

LEENAITDDLVTMLMLVNDVAVSQISAKGLYKQMPGSFNFLRKLLYFQSSQS -

[114]

DrV1\_hel

- - - - - ELT -

- - - - - L -

- - - - - RP -

- - - - - YQ -

- - - - - EKVVQAA - L - RG -

- - - - - ENSIIW -

- - - - - LP -

- - - - - TGGGKTRAAVYVAEKHLE - - - -

TKA - - NA -

LLIIDECHHT - N - - - - K -

- - - - - S -

- - - - - ES -

- - - - - DFT -

- - - - - VYNKIM - - - -

- - - - - WRYVEK - - - -

- - - - - K -

- - - - - MGVG -

- - - - - RLQGEMP -

- - - - - AAMR -

- - - - - HK -

- - - - - EGVFRD -

- - - - - FQ -

- - - - - RG - KT -

- - - - - NVLVC -

- - - - - TDIAS -

- - - - - RG -

LD - - - - TQR -

- - - - - V -

- - - - - GLIVN -

- - - - - YD - FP -

- - - - - ESQ -



-----TDYIH-----RA-----GR-----

-----[148]-----  
DrM\_hel-----MV-----

-----LKVIC-----LN-----TGSGKTFIAVLLIKELSH-----  
QIRGE--N-----

GKRT-VFL-----VNAEVKCLKPCFDLFLIKAS-----SVAH-----  
QASTVRTHS--DLQVG-----DYMSEDMT-SWPEEM-----  
WNREM-----IEN-----QVLVM-----TCHI-----FLHVLC-----  
--N-----GVLP-LS-----KIN-----  
LLVFDECHLA--I--T-----GH-----PYREIM---KICEGCPSCP-----  
-----VIRLLEIL-HEYKPFERQQF-----

ESVEWYNNRNQDNYVSWSDSEDDDEDEEAEAKEKT-----  
EANFPSPF-----TNILCGIIFVERRYT--AVVLN--RLIKEA-----  
GKQ-----D-----PELAY--ISS-NFITG-----  
-----HSIGKN-----QPRNKQMEVE-----  
-FRKQ-----EEVLRK-----FR-----AH-ET-----  
-----NLLIA-----TSIVE-----  
-----EG-----VD-----IPK-----C-----NLVVR-----  
--FD-LP-----TEY-----RSYVQ-----SK-----GRAR--A-PV-----  
SN--YIMLADS-----  
-----ERT-----

KTFQEDLKTYKAI EKILRNKCSKSAECNDFELEPVTDDDNVLPYVLR-----EDGGP--  
RVTMNTAIGHVNRYPARLPSDPFTHLAPKCKTVEMNTGG--  
YRSTLFLPINSPLRVPVTGPMNCARLAEKAVALLCCEKHLKIGELDDHLMVPGKETVKYEEE---LDLHDEEETSV--  
--PGRPGSTKRRQCYPKAV-----KQPCYLYVIGMVLTTPLPDELNFRR---RKLYP-----PEDTTRC-----

FGILTAKPIPRIP-----HFPVYTRSGETVIS-IELQKSGFSLSAEQLELITRLHQYIFSHILR-----  
LEKPALEFKPVEADSAYCVLPLNI-----VEDSNT-----

-----LDLDFKFM-EDIEKSEARIGIPN-----  
-----TQYTKQNPFIKLEDYQDAV IIPRYRNFDPHRFYVADVYT-----  
DLTPLSKFPSPEYETFAEYKTKYNLDLSNVNQPLLD-VDHTSSRLNLLTPRHLNQGKA-----  
-----LPLS-----SAEKRKAKWESLQNKQILVPE- [803]

DrV2\_hel-----EIK-----L-----  
-----RD-----YQ-----MEVARPA--L-EE-----  
-----KNIIVC-----LP-----TGSGKTRVAVFITKEHLE-----  
RKQ--RMGQKG-----

-KV-VVL-----VNK-----V-----PLVE-----  
QHYKAEFGR--FLKHQ-----YSVERVSGASQLKIS-----  
FPQII-----EKN-----DIIIC-----TAQI-----LENSLA-----  
--K-----AKNG--DEDGIELS-----QFT-----  
LMVIDECHHT--K---K---GG-----VYNHIM---IRYLKQ--K-----  
-----LAQLKTIILKEFSTRE-----  
-----  
--KA--RGIIFTQTRLS--AIALC--QWIEEN--PKF-----  
-----D-----EVGVR--ASY-LIGGG-----DQ-----  
-----SVVKPMT-----AAEQ-----KDVLKR-----  
-----FR-----TG-EI-----NLLIA-----EG-----  
--TTVAE-----  
LD-----IAE-----C-----NVVIR--YC-LV-----TNE-----  
--VAMIQ-----AR-----GRGR--A-ED-SS--YTLVAEA-----

[341]

DrV\_mgc\_D

-----FR-----TEQ-----KSVISH-----  
-----QG-YL-----NLLIS-----TSVAE-----  
-----EG-----LD-----  
IPE-----C-----NLVVR--YG-LL-----TNE-----  
IAQQQ-----AS-----GRAR--A-SN-SV--YSVVADV-----  
-----  
-----G--GREVR-----KELVNEY-----  
-----LEDLTARAIDEVQ-----  
RMSPVDFRHKV---FELQKTAV-----

-----VIRM-----  
-EAERKRDAKKQRY-SPGQVQL- [137]  
EcB\_hel VRRDEEIEINFVSKDYFEVKAHIVTPADERFVAIWQPSESECEP-----  
-----YQDEEGRLLHRSLADHVVKRIDG-----  
-----QPAFVT-----SYNDKRESETAPLPYSLS-----

-----TLQIEAAKRFGLSAQQVLDVCQKLYETHKLITYPRSDSRY-----

-----LPEEHFTGRHAVLNIAIVHQPDLLPQ-----  
-----PVMDIDRRNRCWDDGKVDA-----  
HHAIIP TARSASASLTENERKVYGLVARQYIMQFC-----FRKCVIELDI-----  
-----AGGKFIAKARFLAEAGWRTLLG-----

-----GKERNEENEGMPLPVVAKGD-----  
-----ELLCE-----  
-----RG-----

EVVER-----QTQPPRPFTDATLLS-----AMT-----  
GIARFVQDKELKKILRATDGL-----

-----GTEATRAGII ELLFKRTFLFKKARYIHASEAGRALIHSLPASAAHPDMTAHW EATLTQISEKKCRYQDFMQPLTNSLQEL  
IQQAKQNGAVRAFKGFSAPPSGASKRRKPQAKKAKE-----QDQ-- [431]  
EuA\_hel -----ASEIRHSLLASGLLEA-----  
-----RA-----YQ-----LEAVDET--LSG-----  
-----STLLV-----LP-----TAAGKTAVAWMVMAEMLRRT-----

-----DGWA-LMI-----APT-----VA-----LVKQ-----  
HHDGLVEAFSGQG-----IEAVAMSGAIPAAK-----  
RQSMW-----GRS-----RLVVS-----TPQV-----VRNDVI-----  
---R-----GVLD--LA-----DCC-----  
VLIVDEAHHT--T--G-----ER-----GEAQVA--DLY-----  
-----VGAVRRLVRDRLRRDE-----  
-----EARI IIFATFRDS-----VGALE-----KALT-----

```

-----G-----LQDCR--PIQ-FIGQS-----R-----
-----KSSAGGLT-----PKQQ-----VARIEE-----
-----FR-----SG-SA-----NVLIA-----
--TSVGE-----EG-----
LD-----IPT-----A-----DLVIF--YE-PV-----PSE-----
-----IRTIQ-----RR-----GRTG--R-HR-DG--DVVVLI-----
-----
-----AED--TRDEG-----ARAAALR-----
-----KEENMHRVQRVR-----
-----RSLRSAH-----L-DLSNLDEFVVDDEEVISAVDF-VSSIREEH-----
RPEIVEEDRAEEETRRTTPTILPP-----STFRPR-----
-----GQTGLEQF-KSAPKREGAPPEPS-----
-----PEAS-----
-----DSDTPAKTQTEPEPENQPENPVSI AQDLLALEESSLPDVPGSVIAADDR-----
-----ELNSAVVARLK-ALGAEVVIE- [477]
Pfa_hel -----MVLRRDLIQP-----
-----RI-----YQ-----EVIYAKC--KET-----
-----NCLIV-----LP-----TGLGKTLIAMMIAEYRLT-K--Y-----
-----
GGKV-LML-----APT-----KP-----LVLQ-----
HAESFRRLFNL-----PP-----EKIVALTGEEKSPEE-----
RSKAW-----ARA-----KVIVA-----TPQT-----IENDLL-----
--A-----GRIS-LE-----DVS-----
LIVFDEAHRA--V--G-----NY-----AYVFIA--REY-----
-----MDKLKEI IREQLQRKQ-----
-----NSKIIVFTNYRET--AKKIV--NELV-----
-----KDGIK--AKR-FVGQA-----S-----
-----KENDRGLS-----QREQ-----KLILDE-----
-----FA-----RG-EF-----NVLVA-----
--TSVGE-----EG-----
LD-----VPE-----V-----DLVVF--YE-PV-----PSA-----
-----IRSIQ-----RR-----GRTG--R-HM-PG--RVIILM-----
-----
-----AKG--TRDEA-----YYWSSRQ-----
-----KEKIMQE-----
-----
----- [300]
FrV1_hel -----DFR-----L-----
-----YS-----YQ-----QEVVRRR--L-LG-----

```

-----ENIIIW-----LP-----TGAGKTRAAVYVAKRHLE-----  
TTA--KA-----  
-----  
-KV-VVL-----VNK-----VLRASKRSRNQKLCDVACSLTTAPPQIHLVD-----  
QHYTEKFQP--HLDRS-----YRVVPISGDSEERDF-----  
FGQVV-----KDS-----DVIC-----TAQI-----  
-----LA-----DIT-----  
LLIIDECHHT--K--K--QA-----VYNQIM---SCYVEK---  
KLNGERALPQVGLGTASLGTGGEKILERAVEYVVLQVQD-PFGDHLKWMKLESVLLNQFRPGG-----  
-----ES--RGILFSKTRKS---THCLC---DWVSTS-----STL-----  
-----Q-----QAGIK-AAI-LTGAG-----  
-NS-----QVKQ-----  
-KDTIRS-----FR-----QG-DL-----NLLIS-----  
-----TSVAE-----  
-EG-----LD-----IPE-----C-----NLVVR---YG-LL-----  
-TNE-----IAQKQ-----AS-----GRAR--A-RD-SQ--YSVIAQK-----  
-----  
-----G--GREER-----REHINEY-----  
LDELTGDIAVIQ-----AMRPPEFRSKVQ-I-AQMQREAI-----  
-----  
-----MKRK-----  
-----VQESQKAKRRSQH-TPASVQL- [410]-----  
FrV2\_hel-----QHAARDGEADDIT-----L-----  
-----RD-----YQ-----MKVVRPA--L-EG-----  
-----KNIIIC-----LP-----TGWGKTRAAVYVAKKHL-----  
SRK--AAGQTG-----  
-----  
-----E-----  
QHYSAEFLP--FLKPM-----YKVERVSGASQLKIS-----  
FVDTL-----RKN-----DVIIC-----TAQI-----LENYLD-----  
--R-----SRTG--EDEGVNLS-----DLS-----  
LIIVDECHHT--Q--K--EG-----VYNEIM---VRYLKQ--K-----  
-----LSILRTKILQEFSTRQ-----  
-----DA--RGIVFTKTRRV---AIALT---QWIQEN---PKF-----  
-----A-----DLDVK--AAY-VIGGG-----DQ-----  
-----SVVKPMT-----QAEQ-----KDVLTK-----  
-----FR-----SG-EV-----NLLIA-----EG-----  
-----TSVAE-----  
LD-----IPK-----C-----NVVIR---YG-HV-----GNE-----  
-----ISMIQ-----VR-----GRGR--A-ED-ST--YTVVDVK-----

-----D-----SGVAE-----KECVNEY-----  
-----RKDMMNK AIDKIG-----  
-----ALKQDAYDKKVQ-I-QEFQIQAI-----

-----MEYR-----  
-----LRMKMKQKEDIKNE DPSEVKF----- [366]  
GgV1\_hel -----TDIVLKVKN E KLEALKGLSCSTCMTSL-----  
-----YGGTNNLSRSYSDES NFF-----

-----  
DKTKDKESTQMHNPEEDYSTAAFMSAVSLHSMNLP-----  
-----  
VAEMGNAESAVFS-----

-----VTLPGPGDPGAPPLPPELQ-----  
-----SEQQ-----EPCTSS-----

SD-----  
-----NCFLP-----LR-----SRSLHPQ-----

----- [138]  
GgV\_DAE\_D -----



-----VEKQ-----  
-----MKAKRDQRKTYKK-NPSLITF----- [417]  
GgM\_hel SPALQSLSMAGLQLMTPASSPMGPFGLPWQQEAIHDNIYTP-----  
-----RK-----YQ-----VELLEAA--L-D-----  
-----HNTIVC-----LN-----TGSGKTFIAVLLTKELSY-----  
QIRGDFNKN-----  
-----  
GKRT-VFL-----VNS-----AN-----QVAQ-----  
QVSAVRTHS--DLKVG-----EYSSLEVTESWTKEK-----  
WSQEF-----SKH-----QVLVM-----TCHV-----ALTVLR-----  
--N-----EYLS--LS-----NIN-----  
LLVFDECHLA--I--Q-----DH-----PYREIM---KICEDYPSCP-----  
-----VIKLEIL-RKYKPYERQQF-----  
ESVEWYNNRNQDNYVSWSDSEDDDEDEEIEEKEKP-----  
ETNFPSPF-----TNILCGIIFVERRYT--AVVLN--RLIKEA-----  
GKQ-----D-----PELAY--ISS-NFITG-----  
-----HGIGKN-----QPRNKQMEVE-----  
-FRKQ-----EEVLRK-----FR-----AH-ET-----  
-----NLLIA-----TSIVE-----  
-----EG-----VD-----IPK-----C-----NLVVR-----  
--FD-LP-----TEY-----RSYVQ-----SK-----GRAR--A-PI-----  
SN--YIMLADT-----  
-----DKI-----  
KSFEEDLKTYKAI EKILRNKCSKSVDTSETETEPVDDDDVFPPYVLRT--DENSP--  
RVTINTAIGHINRYCARLPSDPFTHLAPKCKTRELDPHT---  
FYSTLYLPINSPLRASIVGPPMSCARLAERVVALICCEKLHKIGELDDHLMVPGKETVKYEEE---LDLHDEEETSV--  
--PGRPGSTKRRQCYPKAIP ECLRDSYPKPDQPCYLYVIGMVLTTPLPDELNFRR---RKLYP-----PEDTTRC-----  
-----  
FGILTAKPIPIQIP-----HFPVYTRSGEVTIS-IELKKSFTLSLQMLELITRLHQYIFSHILR-----  
LEKPALEFKPTEADSAYCVLPLNI-----VDDSS-----  
-----  
-----LDIDFKFM-EDIEKSEARTGIPS-----  
-----TQYTKEMPFIFKLEDYQDAV IIPRYRNFDQPHRFYVADVYT-----  
DLTPLSKFPSPEYETFAEYKTKYNLDLTNLNQPLLD-VDHTSSRLNLLTPRHLNQGKGA-----  
-----LPLS-----SAEKRKAKWESLQNKQILVPE- [858]  
HaA\_hel -----MGYVDHPMLADGVI-EA-----  
-----RQ-----YQ-----LQLAAAA--RQG-----  
-----HTLVC-----LP-----TGLGKTTVSLLV TAYRLADD--A-----  
-----  
GGTA-LLL-----APT-----KP-----LVEQ-----  
HAGFYREALAI-----PD-----DDVVVFTGETRPDD-----  
RRAAW-----TDA-----RVVVA-----TPQV-----VENDLV-----  
--G-----GRID--MD-----DVV-----  
HCTFDECHRA--T--G-----DY-----AYTYVA---ERY-----  
-----FRQARMLLAETLGIED-----  
-----  
-----GDRVIVFTESRDT--AEALT--AFLG-----  
-----EHFD--TRR-FVGQG-----D-----  
-----ADGSDGMT-----QTEQ-----RETLAE-----  
-----FR-----NG-DF-----EVLVS-----EG-----  
--TSVAE-----



LD-----VPE-----V-----DLVLF----FE-PV-----PTA--  
-----IRSVQ-----RK-----GRTG--R-QT-AG--RVVLL-----  
-----  
-----AED--TRDEA-----YFWISRR-----  
-----REQEMTEELQSLK-----  
-----GRADELET-----E-L-----GGDGAQQA-----LDEFGDAEA-----  
-----AGEEPAA-----PA-----PEDV-----  
-----SDGE-----  
DTEGVAAR-----VDGA--GEAVEVVVDQR-----  
-----ELDSTIARELSKRDGVETRLE- [400]  
HsM\_DEA\_D  
-----  
-----LTKLRNTIMEQYTRTE-----  
-----ES-----  
ARGIIFTKTRQS-----AYALS-----QWITEN-----EKF-----  
-----A-----EVGVK--AHH-LIGAG-----HS-----  
-----SEFKPMT-----QNEQ-----KEVISK-----  
-----FR-----TG-RI-----NLLIA-----  
TTVAE-----EG-----LD-----  
-----IKE-----C-----NIVIR--YG-LV-----TNE-----  
-----IAMVQ-----AR-----GRAR--A-DE-ST--YVLVAHS-----  
-----  
-----G--SGVIE-----RETVNDF-----  
-----REKMMYKAIHCVQ-----  
--NMKPEEYAH--K-I-LLELQMOSI-----  
-----  
-----MEKK-----  
--MKTKRNIAKHYKN-NPSLITF- [205]  
HsM1\_hel-----PTNC-PV-----  
-----RD-----YQ-----LHISRAA--LFC-----  
-----NTLVC-----LP-----TGLGKTFIAAVVMYNFYRWF--P-----

SGKV-VFM-----APT-----KP-----LVTQ-----  
 QIEACYQVMGI-----PQ-----SHMAEMTGSTQAST-----  
 RKEIW-----CSK-----RVLFL-----TPQV-----MVNDLS-----  
 ---R-----GACP-AA-----EIK-----  
 CLVIDEAHKA--L--G-----NY-----AYCQVV-----  
 RELVKYTNHFRILALSATPGSDIKAVQQVIT-----  
 LKKLEEVVIEHFKSWNAENTTEKKRD-----  
 -----ETRVMIFFSSFRDS-----VQEIA-----EMLSQ-----  
 -----H-----QPIIR-----  
 VMT-FVGHA-----S-----GKSTKGFT-----  
 -----QKEQ-----LEVVKQ-----FR-----  
 -----DG-GY-----NTLVS-----TCVGE-----  
 -----EG-----LD-----IGE-----V-----  
 -----DLIIC-----FD-SQ-----KSP-----IRLVQ-----RM-----  
 -----GRTG--R-KR-QG--RIVIIL-----  
 -----  
 -----  
 -----SEG--REERI-----YNQSQSN-----  
 -----KRSIYKAISSN-----  
 RQVLHFYQRSPRMVPDGINP-----KL--HKMFITHG-----  
 -----  
 VYEPEKPSRN-----LQR-----KSSIFSYRDGK-----  
 -----  
 [395]  
 Hsm2\_hel-----SEVSDTNLYSPFK-----P-----  
 -----RN-----YQ-----LELALPA--M-KG-----  
 -----KNTIIC-----AP-----TGCGKTFVSLICEHHLK-----  
 KFP--QG-QKG-----  
 -----  
 -KV-VFF-----ANQ-----I-----PVYE-----  
 QQKSVFSKY--FERHG-----YRVTGISGATAENVP-----  
 VEQIV-----ENN-----DIIIL-----TPQI-----LVNNLK-----  
 ---K-----GTIP--SLS-----IFT-----  
 LMIFDECHNT--S--K--QH-----PYNMIM----FNYLDQ--K-----  
 LGGSSGPLPQVIGLTASVGVGDAKNTDEA-LDYICKLCLTKLRNTIMEQYTRTE-----  
 -----ES-ARGIIFTKTRQS-----AYALS-----QWITEN-----EKF-----  
 -----A-----EVGVK--AHH-LIGAG-----HS-----  
 -----SEFKPMT-----QNEQ-----KEVISK-----  
 -----FR-----TG-KI-----NLLIA-----EG-----  
 --TTVAE-----  
 LD-----IKE-----C-----NIVIR--YG-LV-----TNE-----  
 ---IAMVQ-----AR-----GRAR--A-DE-ST--YVLVAHS-----  
 -----  
 -----  
 -----G--SGVIE-----RETVNDF-----  
 -----REKMMYKAIHCVQ-----

```

-----NMKPEEYAH--K-I-LELQMQSI-----
-----
-----
-----
-----
-----MEKK-----
-----MKTKRNIAKHYKN-NPSLITF-      [407]
HsM3_hel      -----ME-----L-----
-----RS-----YQ-----WEVIMPA--L-EG-----
-----KNIIIW-----LP-----TGAGKTRAAAYVAKRHLE-----
TVD--GA-----
-----
-----KV-VVL-----VNR-----V-----HLVT-----
QH-GEEFRR--MLDGR-----WTVTTLSGDMGPRAG-----
FGHLA-----RCH-----DLLIC-----TAEI-----LQMALT-----
--S-----PE-----EEEHVLT-----VFS-----
LIVVDECHHT--H--K-----DT-----VYNVIM----SQYLEL--K-----
-----LEMLEKILQRQFSSSN-----
-----
---SP--RGIIFTRTRQS---AHSLL---LWLQQQ---QGL-----NS-----
-----Q-----TVDIR--AQL-LIGAG-----QEVIQK-----
-----SQST--HMT-----QRDQ-----NLLVA-----
-----FQ-----DG-TL-----
---TSVAE-----EG-----
LD-----IPH-----C-----NVVVR---YG-LL-----TNE-----
---ISMVQ-----AR-----GRAW--A-DQ-SV--YAFVATE-----
-----
-----
-----G--SRELK-----RELINEA-----
-----LETLMEQAVAAVQ-----
-----KMDQAEYQAKI-----RDLQQAAL-----
-----
-----
-----TKRA-----
-----AQAQRENQRQQF-PVEHVQL-      [357]
HsM4_hel      SPALQPLSMAGLQLMTPASSPMGPFGLPWQQEAIHDNIYTP-----
-----RK-----YQ-----VELLEAA--L-D-----
-----HNTIVC-----LN-----TGSGKTFIAVLLTKELSY-----
QIRGDFSRN-----
-----
-----GKRT-VFL-----VNS-----AN-----QVAQ-----
QVSAVRTHS--DLKVG-----EYSNLEVNASWTKER-----
WNQEF-----TKH-----QVLIM-----TCYV-----ALNVLK-----
--N-----GYLS--LS-----DIN-----
LLVFDECHLA--I--L-----DH-----PYREIM----KLCENCPSCP-----
-----VIKLEIL-RKYKPYERQQF-----
ESVEWYNNRNQDNYSWSDSEDDDEDEEIEEKEKP-----
ETNFPSPF-----TNILCGIIFVERRYT---AVVLN---RLIKEA-----

```

GKQ-----D-----PELAY--ISS-NFITG-----  
-----HGIGKN-----QPRNKQMEAE-----  
-FRKQ-----EEVLRK-----FR-----AH-ET-----  
-----NLLIA-----TSIVE-----  
-----EG-----VD-----IPK-----C-----NLVVR-----  
--FD-LP-----TEY-----RSYVQ-----SK-----GRAR--A-PI-----  
SN--YIMLADT-----  
-----DKI-----  
KSFEEDLKTYKAI EKILRNKCSKSVDTGETDIDPVMDDDDVFPPYVLRP--DDGGP--  
RVTINTAIGHINRYCARLPSDPFTHLAPKCRTRRELDPDGT---  
FYSTLYLPINSPLRASIVGPPMSCVRLAERVVALICCEKLHKIGELDDHLMPVGKETVKYEEE---LDLHDEEETSV--  
--PGRPGSTKRRQCYPKAIP ECLRDSYPRPDQPCYLYVIGMVLTTPLPDELNFRR---RKLYP-----PEDTTRC-----  
-----  
FGILTAKPIPIQIP-----HFPVYTRSGEVTIS-IELKKSGFMLS LQMLELITRLHQYIFSHILR-----  
LEKPALEFKPTDADSAYCVLPLNV-----VNDSST-----  
-----  
-----LDIDFKFM-EDIEKSEARIGIPS-----  
-----TKYTKETPFVFKLEDYQDAV IIPRYRNFDPHRFYVADVYT-----  
DLTPLSKFPSPEYETFAEYKTKYNLDLTNLNQPLLD-VDHTSSRLNLLTPRHLNQGKA-----  
-----LPLS-----SAEKRKAKWESLQNKQILVPE- [858]  
MaA1\_hel -----GDFVSHPLLVPNTV-SS-----  
-----RS-----YQ-----ETLSQKA--LEK-----  
-----SSLIV-----LP-----TGLGKTIIALLVILNRLQ-AGGP-----  
-----  
-----  
GAKV-LML-----SPT-----KP-----LVEQ-----  
HASFFRKAMAI-----DP-----EKIVVFTGSTPPEE-----  
RADLW-----DKA-----TVIVS-----TPQV-----IENDLL-----  
---C-----RRFT--LE-----DVT-----  
VVVFDEAHRA--T--G-----NY-----AYVYIA---KRY-----  
-----TEKVAEIVLEQLQANP-----  
-----  
-----ASKVIVFTNYRDT-----ADVVA---KRLA-----  
-----E-----VEGIK--PVR-FVGQA-----S-----  
-----KLNDKGLS-----QKKQ-----VEILDR-----  
-----FR-----AG-EY-----NTLIA-----EG-----  
--TSVAE-----  
LD-----IPS-----T-----DLVLF--YE-PV-----PSE-----  
-----IRSIQ-----RR-----GRTG--R-NT-VG--RVVCLI-----  
-----  
-----  
-----SKG--TRDEA-----AYRSSQS-----  
-----KERKMYKTMQNMK-----  
-----DGEAMAGMLEH-----NSEFSQAT-----IDDI AEEPVEDA-----  
-----  
-----A-VMTGGSSTVSLQPP-----SPAS-----  
-----ASQAKLELF-----AARDNGVTVLTDTR-----  
-----EMRSQVVKLE-EHGAKLDFR- [409]

MaA2\_hel -----MKHPLIKPDTV-EQ-----  
 -----RL-----YQ-----LNLAGKA-LEG-----  
 -----SSLVV-----LP-----TGLGKTIIALFVIASRLQ-R-F-----  
 -----  
 GGKA-LIL-----SPT-----KP-----LVDQ-----  
 HAAFFKKVMAL-----PE-----EEILAF TGSIAPAE-----  
 REKLW-----AQG-----KLIVS-----TPQV-----IENDLL-----  
 ---T-----KRIS-LE-----DVS-----  
 HITFDEAHRA-V-----G-----NY-----AYTFIA---EKY-----  
 -----LELARKIVSEQLKKNP-----  
 -----DSRVIVFTNYRDT-----AEIVA---NALS-----  
 -----G-----FSGII-PIR-FVGQG-----S-----  
 -----RNKNKGLT-----QKQQ-----AEILDK-----  
 -----FR-----AG-EY-----NVLVA-----EG-----  
 ---TSVAE-----  
 LD-----IPA-----T-----DMVLF---YE-PI-----PSE-----  
 ---IRSIQ-----RK-----GRTG-R-QQ-KG-RVIVLV-----  
 -----  
 -----TKG---TRDEA-----YYWSSKN-----  
 -----KEKRMLKSMHGLE-----  
 ---TALTPKVS---K-KSAALSDFENLPCTP-DPQ---LKTEK---IEIE-IEKEED-----  
 -----  
 -----E-EGDGFENRTDLYS-----EKSS-----  
 -----HP-ETGVNGD-----GKKSGNEQ-----  
 ADINAKERQKTLVDFGTASE-----DNASESLRIVIDHR-----  
 -----ETKSGVAKTLD-RLGMGLSFA-[442]  
 MaM\_helR -----SEVSDTNLYSPFK-----L-----  
 -----RN-----YQ-----LELALPA-K-KG-----  
 -----KNTIIC-----AP-----TGCGKTLVAVLICEHHLK-----  
 KFP-PG-QKG-----  
 -----  
 -KV-VFF-----ANQ-----I-----PVYE-----  
 QQESVFSKY-FERLG-----YRVTGISGATAENVP-----  
 VEQIV-----ENN-----DIIIL-----TPQI-----LVNNLK-----  
 ---K-----GTIP-SLS-----VFT-----  
 LMIFDECHNT-S---K---QH-----PYNMIM---FNYLDQ---K-----  
 LGGSSGPLPQVIGLTASVGVGDAKDTDEA-LDYICKLCLEDLCFILQEEYHLNP-----  
 -----  
 -----ETITILFVKTRAL---VDALK---NWIEGN---P-----  
 -----K-----LHFLK-PGI-LTGRG-----K-----  
 -----TNQNTGMT-----LPAQ-----KCILEA-----  
 -----FK-----VNGDH-----NILIA-----EG-----  
 ---TSVAD-----  
 ID-----IAQ-----C-----NLVIL---YE-YV-----GNV-----  
 ---IKMIQ-----TR-----GRGR-A-RG-SK-CFLLTS-----  
 -----

-NAGVIEKEQINMYKEKMMNDCILHLQTW-

-DEAVFREKILHIQ-

THEKLIRDSQEKPKPVPDKEN- [397]

MaM\_helM -AARASPEPELQ-

-L-

-RP- -YQ-

-MEVAQPA- -L-EG-

-KNIIIC- -LP-

-TGSGKTRVAVYIAKDHLD-

KKK- -KASEPG-

-KV-IVL- -VNK- -V-  
QLFRKEFKP- -FLKKW- -YRVIGLSGDTQLKIS-

-LLVE-

FPEVV- -KSC- -DIIIS-

-TAQI- -LENSLL-

-N- -LENG- -EDAGVQLS- -DFS-

LIIIDECHHT- -N- -K- -EA- -VYNNIM- -RRYLMQ-

KLKNNRLKKNKPVIPLPQMLGLTASPGVGGATKQAKA- EEHILKLCLTKLRNTIMEQYTRTE-

-ES-ARGIIFTKTRQS- -AYALS- -QWITEN-

-EKF-

-A- -EVGVK- -AHH- -LIGAG-

-HS- -SEFKPMT- -QNEQ-

-KEVISK- -FR- -TG- -KI- -NLLIA-

-TTVAE-

-EG- -LD- -IKE- -C- -NIVIR- -YG- -LV-

-TNE- -IAMVQ- -AR- -GRAR- -A- -DE- -ST- -YVLVAHS-

-G- -SGVIE- -RETVNDF-

REKMMYKAIHCVQ- -NMKPEEYAH- -K- -I- -LELQMQSI-

-MEKK-

-MTKRSIAKHYKN-NPSLITF- [419]

MaM1\_hel -ME-

-L-

-RP- -YQ-

-WEVIMPA- -L-EG-

-KNIIIW- -LP-

-TGAGKTRAAAYVAKRHLE-

TVD- -GA-

-KV-VVL- -VNR- -V-  
QH-GEEFRR- -MLDGR- -WTVTTLSGDMGPRAG-

-HLVT-

FGHLA- -RCH- -DLLIC-

-TAEL- -LQMALT-

---S-----PE---EEHVVELT-----AFS-----  
LIVVDECHHT--H---K-----DT-----VYNVIM---SRYLEL--K-----  
-----LEMLEKILQRQFRSSD-----  
-----SP--RGIIFTRTRQS---AHSL--LWLQQQ---PGL-----  
-----Q-----TVDIR--AQL-LIGAG-----NS-----  
-----SQST--HMT-----QRDQ-----QEVIRK--  
-----FR-----DG-TL-----NLLVA-----EG-----  
--TSVAE-----LD-----IPQ-----C-----NVVVR---YG-LL-----TNE--  
-----ISMVQ-----AR-----GRAR--A-DQ-SV--YSFVATE-----  
-----  
-----G--SRELK-----RELINEA-----  
-----LEMLMEQAVAAVQ-----  
-----KMDQAEYQAKI---QDLQQAAL-----  
-----  
-----TKRA-----  
-----AQAQRESQRRQF-PVEHVQL- [357]  
MaM2\_hel SPALQPLSMAGLQLMTPASSPMGPFGLPWQQEAIHDNIYTP-----  
-----RK-----YQ-----VELLEAA--L-D-----  
-----HNTIVC-----LN-----TGSGKTFIAVLLTKELSY-----  
QIRGDFNRN-----  
-----  
GKRT-VFL-----VNS-----AN-----QVAQ-----  
QVSAVRTHS--DLKVG-----EYSNLEVNASWTKER-----  
WNQEF-----TKH-----QVLIM-----TCYV-----ALNVLK-----  
--N-----GYLS--LS-----DIN-----  
LLVFDECHLA--I---L-----DH-----PYREIM---KLCENCPACP-----  
-----VIKLEIL-RKYKPYERQQF-----  
ESVEWYNNRNQDNYVSWSDSEDDDEDEEIEEKEKP-----  
ETNFPSPF-----TNILCGIIFVERRYT---AVVLN---RLIKEA-----  
GKQ-----D-----PELAY--ISS-NFITG-----  
-----HGIGKN-----QPRNKQMEAE-----  
-FRKQ-----EEVLRK-----FR-----AH-ET-----  
-----NLLIA-----TSIVE-----  
-----EG-----VD-----IPK-----C-----NLVVR--  
--FD-LP-----TEY-----RSYVQ-----SK-----GRAR--A-PI-----  
SN--YIMLADT-----  
-----DKM-----  
KSFEEDLKTYKAI EKILRNKCSKSVDTGETDIDPVVDDDDVFPPYVLRP--DDGGP--  
RVTINTAIGHINRYCARLPSDPFTHLAPKCRTRLPDGT---  
FYSTLYLPINSPLRASIVGPPMSCVRLAERVVALICCEKLHKIGELDDHLMPVGKETVKYEEE---LDLHDEEETSV--  
--PGRPGSTKRRQCYPKAIP ECLRDSYPKPDQPCYLYVIGMVLTTPLPDELNFRR---RKLYP-----PEDTTRC-----  
-----  
FGILTAKPIPIQIP-----HFPVYTRSGEVTIS-IELKKS GFMLS LQMLELITRLHQYIFSHILR-----  
LEKPALEFKPTDADSAYCVLPLNV-----VNDSST-----

```

-----LDIDFKFM-EDIEKSEARIGIPS-----
-----TKYTKETPFVFKLEDYQDAV IIPRYRNFDQPHRFYVADVYT-----
DLTPLSKFPSPEYETFAEYYKTKYNLDLTNLNQPLLD-VDHTSSRLNLLTPRHLNQGKGA-----
-----LPLS-----SAEKRKAKWESLQNKQILVPE- [858]
MdM_helm -----KKRASPEPELV-----L-----
-----RS-----YQ-----MEVAEPA--L-EG-----
-----KNIIII-----IP-----TGSGKTRVAVYIAKDHLD-----
KKK--KASEPG-----
-----
-KV-MVL-----VNK-----V-----PLVD-----
QHLRKEFNP--FLKKC-----YRVIGVSGDSQLKIS-----
FPEVV-----RSY-----DVIIS-----TAQI-----LENSLL-----
--D-----SENG--DDDGVQLS-----DFS-----
LIIIDECHHT--N---K-----EA-----VYNTIM---RRYVKQ---
KMKNCRLLKANKPVVPQPQILGLTASPGVGGATKQAKA-EDHILQLCLTKLRNTIMEEFTKTD-----
-----
-----GSVARGIIFTKTRQS---AYSLS---QWINSI-----EKF-----
-----A-----EVGVK--AHH-LIGAG-----
--NS-----SEFKAMT-----QNEQ-----
-KEVINN-----FR-----TG-KI-----NLLIA-----
-----TTVAE-----
-EG-----LD-----IKE-----C-----NIVIR---YS-LV-----
--TNE-----IAMLQ-----AR-----GRAR--A-DE-ST--YVLVASD-----
-----
-----G---SGVVE-----RENVNLY-----
REKMMHKAIERVQ-----NMKPEEYAQ--K-I-WGLQKQSL-----
-----
-----MEKK-----
-----MKTRKSLAKQIKD-KPSLVTF- [420]
MhA_hel -----MEYISHPFIAPETM-EK-----
-----RT-----YQ-----FSISMNA--LEK-----
-----NTLVV-----IP-----TGLGKTAIALIVAASRLY-Q--N-----
-----
GGKV-LMM-----APT-----KP-----LVEQ-----
HLRYFKAHLAI-PGDE--K-----TKFAMFTGEASPEK-----
RTAEW-----MAA-----SMVLA-----TPQV-----IKNDLI-----
--A-----GRYD--LT-----DVS-----
LLIVDEGHRA--V---G-----NY-----AYVFIA---ERY-----
-----LLILPELVQSILDESP-----
-----DTRIIVFATYRDT---VKMVV---DTLQ-----
-----AAGIS--AER-FVGKA-----N-----
-----KDQEKGLS-----QKRQ-----IATISR-----
-----FR-----EG-EF-----SVLVA-----

```



--TSVGE--EG--  
LD--IPS--T--DVVIF--YE-PV--PSE--  
--IRSIQ--RK--GRTG--R-HN-TG--RIIVLV--

TRK--TTDET--FQIVSRR--  
REKAMVTGMKNLT--

--G--HEKKILQTALPLDLLQKAKAAQEEVFS--GPKIIIDDR--  
--ELVSKVSEHLS-SAGAVIRIE- [374]  
MjA\_hel --MFIEHPLIKPKTL-EA--  
--RL--YQ--QIIAANA--LKK--  
--KTLCV--LS--TGLGKTAIAILVIAGILT-K--K--

DGKV-LIL--APS--RP--LVEQ--  
HYNRLKQVLNI--DE--DKIIALTGKIQPKK--  
RAELY--KKG--KIFIA--TPQV--IENDII--  
--A--GRIN--VD--EFI--  
LLIADEAHHT--T--G--DH--AYAFVA--KKF--  
--LGKVVDMVKNILEKNK--

--DERIIIFAQYRDT--VEKIV--NLLT--  
--QNGIK--AIR-FIGQA--N--  
--KEG-KGMS--QKEQ--IEAIER--  
--FK--K--EG--SVLVS--  
--TSVSE--EG--  
ID--IPS--V--NYIIF--YE-PV--PSE--  
--IRFIQ--RR--GRAM--R-GE-GG--KVYVLI--

AKG--TADEA--YRSALY--  
--KEREMKROLLKNMC--  
--YLLNKRLQ--K-KFEEKSKEE--IKEETEEI--KEKEIESKTAVKE--

-----ET--  
KEEEEKTKKPVITILDFIKQIEVKERSKSEEDKIKQEIKIPKKPIKIIVDVR--  
--E--KNMAKLLH--NYANIELK- [418]  
MkA\_hel --AWRRVNWVFL-ER--  
--RE--YQ--VSVA AEI--LDSM--  
--DNTLVV--IP--TGLGKTAIGVMVLSLV--

-----  
EGRA-VFL-----APT-----VP-----LVNQ-----  
HARFIERATR-----LDVKALTGRVVRPER-----  
RKVEW-----KKS-----DVIVA-----TPHV-----IRNDII-----  
--E-----GRID-PD-----EAS-----  
VVIFDEAHRA--V--G-----GY-----PYVYVS--KEF-----  
-----LPEVEELVKD-----  
-----VESALVFTQYVDT-----AKLIA--DYLKEIGI-----  
-----SVGVLGKE-----  
-----HMK-----EHEQ-----LDVIKS-----  
-----IK-----RG-EC-----RVLVS-----  
--TSVGE-----EG-----  
LD-----LPT-----C-----EEVVL--YE-PV-----PSE-----  
-----IRTIQ-----RI-----GRTA--R-DGAVGNAHVLR-----  
-----  
-----GSFPTLDEIYFHVARREKKMLEAVMRVQEWLRKRKG-----  
-----  
KTTATSKNLRKLRRAKTLTLDQFVGGGRSKRERDEVPPSRAPVIVVDSRELNTKVVEHLRKRKPVVLE-----  
-----  
-----  
RDTLELADYVVGEGVGVERKSESDFARSLLDGRLMDQAREMTREFDRAVIIVEGNPREIEPEAVD GALATLAVDFGISV  
LQSAGPEETAELLYRMAKRFEERQRPRPKR- [484]  
MmM1\_helm-----QTKRVSPEPELQ-----L-----  
-----RP-----YQ-----MEVAQPA--L-DG-----  
-----KNIIIC-----LP-----TGSGKTREAVYITKDHL-----  
KKK--QASESG-----  
-----  
-KV-IVL-----VNK-----V-----MLAE-----  
QLFRKEFNP--YLKKW-----YRIIGLSGDTQLKIS-----  
FPEVV-----KSY-----DVIIS-----TAQI-----LENSLL-----  
--N-----LESG--DDDGVQLS-----DFS-----  
LIIIDECHHT--N--K-----EA-----VYNNIM--RRYLKQ--  
KLRNNDLKKQNKPAIPLPQILGLTASPGVGAACKQSEA-EKHILNICLIKLRNTILEQFTRSE-----  
-----ES-SRGIIFTKTRQS--TYALS--QWIMEN-----AKF-----  
-----A-----EVGVK--AHH-LIGAG-----  
-HS-----SEVKPMT-----QTEQ-----  
-KEVISK-----FR-----TG-EI-----NLLIA-----  
-----TTVAE-----  
-EG--LD--IKE-----C-----NIVIR--YG-LV-----  
--TNE--IAMVQ-----AR-----GRAR--A-DE-ST--YVLVTSS-----  
-----  
-----G--SGVTE-----REIVNDF-----

REKMMYKAINRVQ- - - - -NMKPEEYAH- -K- I- LELQVQSI- - - - -

- - - - -MKVKRSIAKQYND- NPSLITL- [420] - - - - -LEKK- - - - -

MmM\_DEA\_D

- - - - -LRDLYLVLQEEYHLKP- - - - -

ETKTILFVKTRAL- - - -VDALK- - -KWIEEN- - - - -P- - - - -  
- - - - -A- - - - -LSFLK- -PGI- LTGRG- - - - -R- - - - -  
- - - - -TNRATGMT- - - - -LPAQ- - - - -KCVLEA- - - - -  
- - - - -FR- - - - -ASGDN- - - - -NILIA- - - - -  
TSVAD- - - - -EG- - - - -ID-  
- - - - -IAE- - - - -C- - - - -NLVIL- - - -YE- YV- - - - -GNV-  
- - - - -IKMIQ- - - - -TR- - - - -GRGR- -A- RD- SK- -CFL LTS- - - - -

- - - - -SADVIEKEKANMIKEKIMNESILRLQTW- - - - -  
- - - - -DEMKFGKTVHRIQ- - - - -

- - - - -VNEKLLRDSQHQPVPDKEN- [195]

MmM2\_hel

- - - - -ME- - - - -L- - - - -  
- - - - -RP- - - - -YQ- - - - -WEVILPA- -L- EG- - - - -  
- - - - -KNIIIW- - - - -LP- - - - -TGAGKTRAAAFVAKRHLE- - - - -  
TVD- -RG- - - - -

-KV- VVL- - - - -VNR- - - - -V- - - - -HLVS- - - - -  
QH- AEEFRR- -MLDKH- - - - -WTVTTLSGDMGSRAG- - - - -  
FGLMA- - - - -RSH- - - - -DLLIC- - - - -TAEI- - - - -LQLALN- - - - -  
- - - - -S- - - - -SE- - - -EDEVELR- - - - -EFS- - - - -  
LIVVDECHHT- -H- - - -K- - - -DT- - - - -VYNTIL- - - -SRYLEQ- - -K- - - -  
- - - - -LEMLERILLKQFGSPG- - - - -

```

---HT---RGIIFTRTRQT---ASSLL---LWLRQQ---PCL---NT---
---Q---TVGIK---PQM-LIGAG---
---SQST---HMT---QKDQ---QEVIQE---
---FR---DG-IL---SLLVA---EG---
---TSVAE---
LD---IAQ---C---NVVVR---YG-LL---TNE---
---ISMVQ---AR---GRAR---A-GQ-SV---YSFLATE---
---
---G---SREMK---RELTNEA---
---LEVLMEKAVAAVQ---
---KMDPDEFKAKI---RDLQQASL---
---
---VKRA---
---[357]
MmM3_hel---MAGLQLMTPASSPMGPFGLPWQQEAIHDNIYTP---
---RK---YQ---VELLEAA---L-D---
---HNTIVC---LN---TGSGKTFIAVLLTKELAH---
QIRGDLNPH---
---
AKRT-VFL---VNS---AN---QVAQ---
QVSAVRTHS---DLKVG---EYSDLEVNASWTKER---
WSQEF---TKH---QVLIM---TCYV---ALTVLK---
---N---GYLS-LP---DIN---
LLVFDECHLA---I---L---DH---PYREIM---KLCESCPSCP---
---VMKLEIL-RKYKPYERQQF---
ESVEWYNNRNQDNYVSWSDSEDDDDDEEIEEKEKP---
ETNFPSPF---TNILCGIIFVERRYT---AVVLN---RLIKEA---
GKQ---D---PELAY---ISS-NFITG---
---HGIGKN---QPRSKQMEAE---
-FRKQ---EEVLRK---FR---AH-ET---
---NLLIA---TSVVE---
---EG---VD---IPK---C---NLVVR---
--FD-LP---TEY---RSYVQ---SK---GRAR---A-PI-
SN--YVMLADT---
---DKI---
KSFEEDLKTYKAI EKILRNKCSKSDGAEADVHAGVDDDEDAFPPYVLRP--DDGGP--
RVTINTAIGHINRYCARLPSDPFTHLAPKCRTRRELDPDGT---
FYSTLYLPINSPLRASIVGPPMDSVRLAERVVALICCEKHLKIGELDEHLMPVGKETVKYEEE---LDLHDEEETSV---
--PGRPGSTKRRQCYPKAIPCECLRESYPKPDQPCYLYVIGMVLTTPLPDELNFRR---RKLYP---PEDTTRC---
FGILTAKPIPIQIP-----HFPVYTRSGEVTIS-IELKKSQFTLSQQMLELITRLHQYIFSHILR-----
LEKPALEFKPTGAESAYCVLPLNV-----VNDSSST-----
-----LDIDFKFM-EDIEKSEARIGIPS-----
-----TKYSKETPFVFKLEDYQDAV IIPRYRNFDQPHRFYVADVYT-----
DLTPLSKFPSPEYETFAEYKTKYNLDLTNLNQPLLD-VDHTSSRLNLLTPRHLNQGKGA-----
-----LPLS-----SAEKRKAKWESLQNKQILVPE- [850]

```

```

MsA_hel  -----KNWIEHEYLKNVI-EG-----
-----RL-----YQ-----QNLAMSV--LKK-----
-----GNTMIV-----AP-----TAMGKTVIAALVSAERLKHY--K-----
-----
NSKI-LIL-----APS-----KP-----LTLQ-----
HEHSFKKFLKA-----SVTSLTGNDKPSD-----
RKKLW-----NEN-----QVICA-----TPQT-----IESDII-----
--S-----KEYN--FE-----DIS-----
LLILDECHHA--V--G-----SY-----SYVYLA--QKY-----
-----MKRLIELLNQIIDDDK-----
-----KSKVIVFSQFRDT-----TKSIY--ENCN-----
-----KNNLK--ALR-FYGQA-----S-----
-----RENDKGLS-----QKKQ-----IETINA-----
-----FK-----NE-DY-----NILIS-----EG-----
--TSVAE-----
ID-----IPS-----V-----DYVIL--YE-PV-----PSE-----
--IRMIQ-----RK-----GRTG--R-KH-SG--EMFILM-----
-----
-----TKG--TLDES-----YYWSSQR-----
-----KKEITLEN--Y-----VAKKEDVK-----VYDSNKNKIDTQE-----
-----
-----VSDEAEVVIYVDYR-----
-----EKNSNIMRELD-KINCEVKVR-- [375]
MtA_hel  -----YLVHPLLKPEAV-EK-----
-----RL-----FQ-----IDLAARA--LRG-----
-----STLVV-----MP-----TGLGKTIVALMVMLARLE-K-----
-----
GRV-LFL-----APT-----RP-----LVEQ-----
HAAFLRRVLTS-----P-----DLVASVTGETDPES-----
RAEIW-----RSC-----RIAVS-----TPQV-----VENDLL-----
--S-----GRMD--LR-----DVS-----
LVIFDEAHRA--A--G-----NY-----AYVYIA--ERY-----
-----LSRALEIIEDQLETSP-----
-----ESRIIVFTNYRDT-----ATALL--RFLQA-----N-----
-----A-----SDAVK--PVR-FVGQA-----S-----
-----RENDEGLS-----QKKQ-----SEILEK-----
-----FR-----AG-EY-----NVLIA-----EG-----
--TSVGE-----
ID-----IPS-----T-----DMVLF--YE-PV-----PSE-----
--IRSIQ-----RK-----GRTG--R-AR-TG--RVVLI-----
-----

```

-----  
-----  
-----  
----- AKG ----- TRDEA ----- YYWISDR -----  
----- KERTMRRQLQGM -----  
----- AEPLPVDSA -----  
-----  
----- V PDTA ----- PI ----- SSRA -----  
----- SRQISITEI ----- CEPDELPLIIVDSR -----  
----- E ----- RDMARLLE ----- KTGLRIVLR ----- [370]  
NeA\_hel -----  
----- P ----- TGLGKTVIALMLIEYFKQKY ----- P -----  
-----  
-----  
DKKI-LFL ----- APT ----- KP ----- LVNQ -----  
HVEFLRKYSID ----- DP ----- TKIVGISGDIPKEK -----  
RVKLY ----- NA ----- DVIVA ----- TPQT ----- IKNDLA -----  
----- N ----- NLID ----- LN ----- KFS -----  
LIIFDEAHRA ----- V ----- G ----- NY ----- SYTYIA ----- RNF -----  
-----  
----- INALLEIIKKNK -----  
-----  
----- DKKIIVFAQLTDT ----- VMQIT ----- ELLN -----  
----- KNNIK ----- AVA ----- FTGKK -----  
----- LMT ----- QKKQ ----- IETLDK -----  
----- FR ----- AN-IY ----- NVLVA ----- EG -----  
----- SSSVAE -----  
LD ----- IPK ----- V ----- DLVIF ----- YE-PI ----- PSA -----  
----- IRAIQ ----- RK ----- GRTG ----- R-LNYGE ----- VIILYS -----  
-----  
-----  
----- KNTLDEKALWASIRKEK -----  
-----  
MYEILEKLSKEVKPK -----  
-----  
-----  
-----  
-----  
KEQTLNEVLGFRYKIIADQREQNSLVVDALKKLGIGVKIENLEVGDIYIGDVVIERKTIRDFVDSIIDNRIWDQMNKLSQ  
LDKLLILEGEEEDPYFIRDVNPVIRSVILT ----- [383]  
OvV1\_hel ----- EIS ----- L -----  
----- WD ----- YQ ----- MEVAKPA ----- L-EG -----  
----- KNIIIC ----- LP ----- TGSGKTRVAVYITKEHLD -----  
LRR ----- AEGKLG -----  
-----  
-----  
-----  
-----  
QHYTKEFTP ----- YLKHS ----- YKVERVSGDSQLKIS ----- E -----

FAKIV-----QRN-----DIIIC-----TAQI-----LENYLE-----  
--R-----ATSG--VDEGVKLSGMKIA-----DLS-----  
LMIIDECHHT--Q-----K-----GE-----AYNHIM---MRYLKQ--K-----  
-----LSKLRTEILKEFSSRK-----  
-----QA--RGIIFTKTRHS---AITLN---QWIQEN-----PKF-----  
-----D-----DIGIK--PAY-VIGGG-----DQ-----  
-----SDVKPMTAVSVHKVLYQHLEFRYFLNLSLLKVTIIVFLQAEQ-----KDVLLK-----  
-----FS-----TG-EV-----NLLVA-----  
--TTVAE-----EG-----  
LD-----IPA-----C-----NFVIR---YG-HV-----TNE-----  
--IAMIQ-----VMSTLFNDTSQ--GRGR--A-ED-ST--YTVVDVK-----  
-----  
-----N--SGVAE-----KECVNEH-----  
-----REDMMHKAIEKIK-----  
--ALSQADYDKQVQ-I-TDYQLQAI-----  
-----  
-----MENR-----  
-----VRQNRQNKVMKNVNPAAVKF- [400]-----  
OvV2\_hel-----ASQSTMADFE-----L-----  
-----YK-----YQ-----EEVVERA--L-KG-----  
-----ENIIIW-----LP-----TGGGKTRAAVYVAKRHLE-----  
TTA--NA-----  
-----D-----  
QHYSKEFKP--HLGSL-----YNLIKVSGVSEEKDF-----  
FGKVV-----QRN-----DVIIC-----TAQI-----LYNALI-----  
--D-----KE---EAKHVELSGQWLQSSLITGRSPLRTPPLWFCADIT-----  
LLIIDECHHT--H---K-----EA-----VYNKVM---RCYMEK--K-----  
-----MAKLESVLLQQFGPSV-----  
--KS--RGILFSKTRQS---TRCLF---DWVLKS---RAL-----  
-----Q-----TAGVK--AAI-LTGAG-----NGITYM-----  
-----TQAKNGFHFM---SLW-----QNEQ-----AETIRR-----  
-----FR-----QG-DL-----NLLIS-----EG-----  
LD-----IPE-----C-----NLVVR---YG-LL-----TNE-----  
--IAQQQ-----AS-----GRAR--A-VD-SQ--YSVVARA-----  
-----  
-----D--GKEVR-----RERINED-----  
-----LEVLTAKAIAAVQ-----  
--RMTQQDFRRKVI---SSLQNEAV-----

----- I I N K -----  
----- ILETKKMEKRARF-QASSIRL- [389]  
OvV3\_hel ----- ASQSTMADFE- ----- L-  
----- YK- ----- YQ- ----- EEVVERA- -L-KG-  
----- ENIIIW- ----- LP- ----- TGGGKTRAAVYVAKRHLE-  
TTA- -NA-

----- D-  
QHYSKEFKP- -HLGSL- ----- YNLIKVSGVSEEKDF-  
FGKVV- ----- QRN- ----- DVIIC- ----- TAQI- ----- LYNALI-  
---D- ----- KE- ---EAKHVELSGQWLQSSLITGRSPLRTTPLWFCADIT-  
LLIIDECHHT- -H- ---K- ---EA- ----- VYNKVM- ---RCYMEK- ---  
KLKGERQLPQIILGLTASPGTGGARILEDAVEHVLEVLQ- ICAN- ---MAKLESVLLQQFGPSV-  
----- KS- -RGILFSKTRQS- ---TRCLF- ---DWVLKS- ----- RAL-  
----- Q- ----- TAGVK- -AAI- -LTGAG-  
-NGITYM- ----- TQAKNGFHFH- -SLW- ----- QNEQ-  
-AETIRR- ----- FR- ----- QG- DL- ----- NLLIS-  
----- TSVAE-  
-EG- ---LD- ---IPE- ----- C- ----- NLVVR- ---YG- LL-  
---TNE- ---IAQQQ- ----- AS- ----- GRAR- -A- VD- SQ- -YSVVARA-

----- D- -GKEVR- ----- RERINED-  
LEVLTAKAIAAVQ- ---RMTQQDFRRKV- -I- SSLQNEAV-

----- I I N K -----  
----- ILETKKMEKRARF-QASSIRL- [430]  
PpM\_hel ----- ME- ----- L-  
----- RP- ----- YQ- ----- WEVIMPA- -L- EG-  
----- KNIIIW- ----- LP- ----- TGAGKTRAAAYVAKRHLE-  
TVD- -GG-

-KV- -VVL- ----- VNR- ----- V- ----- HLVT-  
QH-GEEFRR- -MLDGR- ----- WTMTTLSGDMGPRAG-  
FGHLA- ----- RCH- ----- DLLIC- ----- TAEI- ----- LQMALT-  
---S- ---PE- ---EEEHLELT- ----- AFS-  
LIVVDECHHT- -H- ---K- ---DT- ----- VYNVIM- ---SQYLEL- ---K-  
----- LEMLEKILQRQFRSSD-  
---SP- -RGIIFTRTRQS- ---AHSL- ---LWLQQQ- ----- PGL-  
----- Q- ----- TVDIR- -AQL- -LIGAG- ----- NS-  
----- SQST- -HMT- ----- QRDQ- ----- QEVIRK-  
----- FR- ----- DG- TL- ----- NLLVA-



--TSVAE--EG--  
LD--IPH--C--NVVVR--YG-LL--TNE--  
--ISMVQ--AR--GRAR--A-DQ-SV--YSFVATE--  
--  
--G--SRELK--RELINEA--  
--KMDQAEYQAKI--RDLQQAAL--LETLMQAVAAVQ--  
--  
--TKRA--  
-----AQAQQRENQRRQF-PVEHVQL- [357]  
PtE\_helU SQEQQNEPKDSLSSLVDQMLSSISNNQEILNNKVNLLLEEDDT--  
-----IVDTIEEFERD--YQ--IELYEKG--IG--  
-----KNSIIY--LE--TGLGKTLVIIMLMWDRLFKY--  
--  
PDKKIVFL--ANT--VQ--LVEQ--  
QAQQIKQKLPRVAELISDDDSMIVKAKEIGSKLNLVHGSKCT--  
DIWNQIMWQIIL--EES--KILVM--TTQI--  
FLNILR--K--GLVK--IS--NFS--  
-----FIAMDECHNA--IQDH--PYNIL--  
KEFYLKTKFQSDNQFLPQIVGATASPVMNSKSVSNNQLLQELLQLSANMDSQYLHIVQVLFELIRKAYSQGDD--  
-----NSRILIFVKQRLTAFFLNRLIE--EYLASE--  
-----RINIVSNFIIGHC--  
--  
SSMVRKQNNSIMINVIESNKEDQEELIKKLYAELQNDQSKFSIEQLKDQVNRLNIFAYRISSTVQ-----  
NDIINK--FR--QG-KI--KILIS--  
-----TSVAE--  
EG--ID--IPM--C--NYVIG--FN-PI--  
--SSS--KAYVQ--MK--GRAR--KENSQ--FMIFMV--  
--  
-----DKLQQAQVQSHQQVQNNIKQI--  
--  
IEELTAPQRQMLNKAMQTLQSKTYENTYFDSFEIEGSGALINTNWSCQLIQQLCQKFNQKDADKTQPKYAIYQLHGNAQ  
TNQQFIAFLLLPIISMKSFI--  
--  
FYGKLAPSSKDAKASAAFEASVQLYQKGYIDDNLQICFDSDLGQHIGADQDDSQIMMTREQWQIACKYSQRLVQSQSTMG  
GKVN SQKRYT NLFKTLFQTKDQEGQFEDFLLYECLFQNEKILLAFPKQMLPQISKSENTLQALGIQFQSMQKISKSYE  
GHYK KYVETIIKEENLQQRDDIYAIINQKCQIRIKSESNSNLLLILKGSVKSFTLSQIINQFALRFKVDLFDQDKIKEQ  
LIQKIQII- [823]  
PtM1\_hel -----PTNC-PV-----  
-----RD--YQ--LHISRAA--LFC--  
-----NTLAC--LP--TGLGKTFIAAVVMYFNFRWF--P--

-----  
-----  
SGKV-VFM-----APT-----KP-----LVTQ-----  
QIEACYQVMGI-----PQ-----SHMAEMTGSTQAFT-----  
RKEIW-----CSK-----RVLFL-----TPQV-----MVNDLS-----  
---R-----GACP-AA-----EIK-----  
CLVIDEAHKA--L---G-----NY-----AYCQVV-----  
RELVKYTNHFRILALTATPGSDIKAVQQVIT-----  
LKKLEEVVIEHFKSWNAENTTEKKRD-----  
-----ETRVMIFFSSFRDS-----VQEIA-----EMLSQ-----  
-----H-----QPIIR-----  
VMT-FVGHA-----S-----GKSTKGFT-----  
-----QKEQ-----LEVVKQ-----FR-----  
-----DG-GY-----NTLVS-----TCVGE-----  
-----EG-----LD-----IGE-----V-----  
-----DLIIC-----FD-SQ-----KSP-----IRLVQ-----RM-----  
-----GRTG--R-KR-QG--RIVVIL-----  
-----  
-----SEG--REERI-----YNQSQSN-----  
-----KRSIYKAISSN-----  
RQVLHFYQRSPRMVPDGINP-----KL--HKMFITHG-----  
-----  
VYEPEKPSRN-----LQR-----KSSIFSIRDGMRQSSL-----  
-----KKDWFLSEEEFKLWNRLYLRLRDSDEIKEIT-LPQAQFSSLQNEE-----  
NKPTQESTTG-----IHQ-----LSLSEWRLWQD-HPLPTHQVD-----  
[476]  
PtM2\_hel NPALQPLSMAGLQLMTPASSPMGPFGLPWQQEAIHDNIYTP-----  
-----RK-----YQ-----VELLEAA--L-D-----  
-----HNTIVC-----LN-----TGSGKTFIAVLLTKELSY-----  
QIRGDFSRN-----  
-----  
GKRT-VFL-----VNS-----AN-----QVAQ-----  
QVSAVRTHS--DLKVG-----EYSNLEVNASWTKER-----  
WNQEF-----TKH-----QVLIM-----TCYV-----ALNVLK-----  
---N-----GYLS-LS-----DIN-----  
LLVFDECHLA--I---L-----DH-----PYREIM---KLCENCPCSP-----  
-----VIKLEIL-RKYKPYERQQF-----  
ESVEWYNNRNQDNYSWSDSEDDDEDEEIEEKEKP-----  
ETNFPSPF-----TNILCGIIFVERRYT---AVVLN---RLIKEA-----  
GKQ-----D-----PELAY--ISS-NFITG-----  
-----HGIGKN-----QPRNKQMEAE-----  
-FRKQ-----EEVLRK-----FR-----AH-ET-----  
-----NLLIA-----TSIVE-----  
-----EG-----VD-----IPK-----C-----NLVVR-----  
--FD-LP-----TEY-----RSYVQ-----SK-----GRAR--A-PI-----  
SN--YIMLADT-----  
-----DKI-----  
KSFEEDLKTYKAIEKILRNKCSKSVDTGEIDIDPVMDDDDVFPPYVLRP--DDGGP--

RVTINTAIGHINRYCARLPSDPFTHLAPKCRTPRELDPGT ---  
FYSTLYLPINSPLRASIVGPPMSCVRLAERVVALICCEKLNHIGELDDHLMFVVGKETVKYEEE --- LDLHDEEETS ---  
--PGRPSTKRRQCYPKAIPCLRDSYPRPDQPCYLYVIGMVLTTPLPDELNFRR --- RKLYP --- PEDTTRC ---  
-----  
FGILTAKPIPQIP --- HFPVYTRSGETSIS - IELKKS GFMLS LQMLELITRLHQYIFSHILR ---  
LEKPALEFKPTDADSAYCVLPLNV --- VNSST ---  
-----  
----- LDIDFKFM - EDIEKSEARIGIPS ---  
----- TKYTKETPFVFKLEDYQDAV IIPRYRNFDQPHRFYVADVY ---  
DLTPLSKFSPSEYETFAEYYKTKYNLDTNLNQPLLD - VDHTSSRLNLLTPRHLNQKGA ---  
----- LPLS --- SAEKRKAKWESLQNKQILVPE - [858]  
PyE\_IFH\_D ---  
-----  
----- IRDITKLIK ---  
-----  
HIKNYMDNDDSFQVNTYNKIK ---  
-----  
----- INPGIFR --- KIMNC --- KYITND ---  
LKIQE ---  
----- GFGAIGKSKCYHRITHSPLLL ---  
-----  
-----  
YVRRYVIFDLIVFIGTSQLMESAFIVIPITVLLI IILFFVVKFWSNLTELFHKKRRKIKRRKEKPKK ---  
----- [146]  
RrM1\_helM --- MGTKRASPKPELQ --- L ---  
----- RP --- YQ --- MEVAQPA --- L-DG ---  
----- KNIIIC --- LP --- TGSKTRVAVYITKDHL ---  
KKK --- QACESG ---  
-----  
-KV-IVL --- VNK --- V --- MLAE ---  
QLFRKEFNP --- FLKKW --- YRIIGLSGDTQLKIS ---  
FPEVV --- KSY --- DVIIS --- TAQI --- LENSLL ---  
---N--- LESG --- EDDGVQLS --- DFS ---

LIIIDECHHT--N-----K-----EA-----VYNNIM---RRLKQ---  
 KLKNHKLKKQNKPTIHLQPILGLTASPGVGAACKQSEA-EKHILNICLIKLRNTILEQFTRSE-----  
 -----ES-SRGIIFTKTRQS---TYALS---QWIMEN---EKF-----  
 -----A---EVGVK-AHH-LIGAG-----  
 -HS-----SEVKPMT-----QTEQ-----  
 -KEVISK-----FR-----TG-EI-----NLLIA-----  
 -TTVAE-----  
 -EG-----LD-----IKE-----C-----NIVIR---YG-LV---  
 -TNE-----IAMVQ-----AR-----GRAR-A-DE-ST--YVLVTSS-----  
 -----G---SGVTE-----REIVNDF-----  
 REKMMYKAINRVQ-----NMKPEEYAH-K-I-LELQVQSI-----  
 -----LEKK-----  
 -----MKVKRSIARQYNS-DPSLITL- [421]-----  
 RrM2\_hel-----ME-----L-----  
 -----RP-----YQ-----WEVILPA-L-EG-----  
 -----KNIIIW-----LP-----TGAGKTRAAAFVAKRHLE-----  
 TVD--RG-----  
 -KV-VVL-----VNR-----V-----HLVN-----  
 QH-AEEFRR--MLDKQ-----WTVTTLSGDMGSRAG-----  
 FGLLA-----RSH-----DLLIC-----TAEI-----LHLALK-----  
 -S-----SE---EDEHVELT-----EFS-----  
 LIVVDECHHT--H---K---DT-----IYNTIL---SRYLEH---K-----  
 -----LEMLEGILLKQFGSPD-----  
 ---HT--RGIIFTRTRQT---ASSLL---LWLRQQ---PCL-----  
 -----Q---TVNIK--PQM-LIGAG-----NT-----  
 -----GQST--HMT-----QKDQ-----QEVIQE-----  
 -----FR-----DG-KL-----NLLVA-----EG-----  
 -TSVAE-----  
 LD-----IAQ-----C-----NVVVR---YG-LL-----TNE-----  
 -ISMVQ-----AR-----GRAR-A-GQ-SV--YSFVATE-----  
 -----G---SREIK-----RELNEA-----  
 -----LEVLMEQAVAAVQ-----  
 ---KMDPEEFKAKI---QDLQLASL-----

-----VKRA-----  
-----ARAAHRESQQGQF-PPDRVQL- [357]  
RrM3\_hel SPALQPLSMAGLQLMTPASSPMGPFGLPWQQEAIHDNIYTP-----  
-----RK-----YQ-----VELLEAA--L-D-----  
-----HNTIVC-----LN-----TGSGKTFIAVLLTKELAH-----  
QIRGDLSPH-----  
-----  
AKRT-VFL-----VNS-----AN-----QVAQ-----  
QVSAVRTHS--DLKVG-----EYSNLEVNASWTKER-----  
WSQEF-----TKH-----QVLIM-----TCYV-----ALNVLK-----  
--N-----GYLS--LS-----DIN-----  
LLVFDECHLA--I-----L-----DH-----PYREIM---KLCDSCPSCP-----  
-----VMKLEIL-RKYKPYERQQF-----  
ESVEWYNNRNQDNYVSWSDSEDDDDDEEIEEKEKP-----  
ETNFPSPF-----TNILCGIIFVERRYT--AVVLN--RLIKEA-----  
GKQ-----D-----PELAY--ISS-NFITG-----  
-----HGIGKN-----QPRSKQMEAE-----  
-FRKQ-----EEVLRK-----FR-----AH-ET-----  
-----NLLIA-----TSVVE-----  
-----EG-----VD-----IPK-----C-----NLVVR-----  
--FD-LP-----TEY-----RSYVQ-----SK-----GRAR--A-PI-----  
SN--YVMLADT-----  
-----DKI-----  
KSFEEDLKTYKAI EKILRNKCSKSVGDGAEADVHAVVDDDDVFPPYVLRP--DDGGP--  
RVTINTAIGHINRYCARLPSDPFTHLAPKCRTRRELPGDT---  
FYSTLYLPINSPLRASIVGPPMGCVRLEAERVVALICCEKLHKIGELDEHLMVPGKETVKYEEE---LDLHDEEETSV--  
--PGRPGSTKRRQCYPKAIPCECLRESYPKPDQPCYLYVIGMVLTTPLPDELNFRR---RKLYP-----PEDTTRC-----  
-----  
FGILTAKPIPIQIP-----HFPVYTRSGEVTIS-IELKKSQFTLSQQMLELVTRLHQYIFSHILR-----  
LEKPALEFQPAGAESAYCVLPLNV-----VNDSSST-----  
-----  
-----LDIDFKFM-EDIEKSEARIGIPS-----  
-----TKYSKETPFVFKLEDYQDAV IIPRYRNFDQPHRFYVADVYT-----  
DLTPLSKFPSPEYETFAEYKTKYNLDLTNLNQPLLD-VDHTSSRLNLLTPRHLNQGKA-----  
-----LPLS-----SAEKRAKAWESLQNKQILVPE- [858]  
SmE\_hel DIPDIMKSASSVDWKIDPESSIETAWDLFRNLYLKVTAPHIP-----  
-----WTPKRPRNSPPWFWSREVRILLR-----  
-----  
-----  
KRRKMWDRFLLGTDEAKSQYQKARNTCASTLRKARKLYEEK-----  
-----  
IVRESIECPKRLYSYINQRTKRRRNVPVSLWGDSTAT-----  
-----  
SLVEDDFGKAQVFSKYFSDVYTIETPFSPVHENPPTQALDSVTIKELDVFGLLIKLDIGKSTGPDELHPKLLKELANFVV  
NPLSVCFNLSVTQ-----VSPVFKTGTKHKPENYRPIS-----  
-----LTSVVVKILEKIIRKELLKYLD-----  
-----ENRILS-----  
-----KKQNSFRTGYSCLTNLLVA-----

---RESWC-----  
ALKDQKLPID-----  
VVYIDFSKAFDKVPHNRLLYKLRNVGIGGNLLMWIKDFLV-----  
GRQQRVVRVNSKLSWETVLSG-----  
-----  
-----VPQGTVLGPVLFLLLYVND-----  
-----  
LPRLSSSVLLYADDVKIWRAIQSKGDSLELQNDLERLSEWSQTWQLPINTSKCIVMHIGHQGTDTYTMNTELPVQAH  
NDLGVIVSQDLKTTAHCRA-----  
-----  
IDAKGFRTLWSIRRAFRHLDAKTFLTLYTVFVRPKLEYCIQAASPCLKKDSELLERVQRTATRILIPGIAKLPYGTRLT  
NLLPLSYRRIRGDLITVFKLLNDKFAPDMPSFFLSSKTENLRGHSKKVHKPRRNYLSADYRLSHRI INEWNSLPQHVVEA  
PSVDSFKRKLQDLRDHHCQD----- [676]  
SpD1\_hel -----DIRPSIGHLETLR-----L-----  
-----ED-----YQ-----VELAEPAL-QG-----  
-----HNTCVV-----AP-----TGSGKTYVAVAVAQEVLR-----  
KSP--GK-----  
-----  
-KV-IFV-----VNQ-----V-----PLVH-----  
QQSTVFKKY--IKDVA-----YICGDHGQPQITRLP-----  
MDQVL-----RKN-----DVVVL-----TAQI-----LVDALT-----  
--K-----GQVS--FN-----QIG-----  
IIVFDECHET--K-----K-----DS-----QYNAIM---AKYMEQ---  
KLKNNKPLPQILGMTASLGVGNARSDKIAIQYMLKMC-----QEKKQELERISMSPKSPNNPALDELQNLIE---  
-----RDIVTCRTQENNGPF---RAILF---TQTIAS-----TWALQKW---  
-----V-----ME-TD--SLK-DLHPE-----  
-VL-----VGCRNPGMN-----LRHQ-----  
-TDVLDN-----FR-----NG-VH-----KLLIA-----  
-----TSVIQ-----  
-QG-----ID-----IPA-----C-----NFVYR---YNYIT-----  
-----DA-----VARIQ-----AR-----GRTR--K-PG-GR--FDLVVH-----  
-----  
-----DYR---GLDGK-----DKLSKEQ-----  
EQIMQQATDAVSS-----LSI-----  
-----  
-----EQMILGTAEYQQHRNVQIFNQ----- [404]  
SpD2\_hel ANAPSGAEVLPADVVRDSASDQEQVGETAAGALASILDFRQP-----  
-----RKDKKVTKKLRGYQVELADPGLQG-----  
-----VNYVIC-----AP-----  
TGSGKTITAAAYICHTNMMKMKKAGKEDD-----



-RVKMMNEAVHNIA-

DCT-

-RDSPETFDNRIQKEQENDQKE- [122]

SpD1HYP\_D

-W- -LNEDP- -DLN- -HINAG-

-IGSG- -MT-

-STQQ-

-IL-

-NRNLQS-

-FN-

-DK-KC-

-RILVA-

-TSIAE-

-EG-

-LD-

ITN-

-C-

-NMVFR-

-YNYVT-

-SD-

IGHLQ-

-TK-

-GR-

-EQKNDQIE- [85]

SpD2HYP\_D

-LQRLEEILVQEYREKP-



ETLAILFTTTRNS---TRALK---AWIQET-----P-----  
-----S-----LEHLN---PGT-LIGT-----  
-----GMT-----QFKQ-----EQLLAM-----  
-----FK-----EK-KH-----KLVIS-----  
TSVAE-----EG-----LD-----  
-----IQM-----C-----NLVVR-----YN-YI-----SND-----  
-----IGRVQ-----AR-----GKQI---A-KL-----

-----QKKDA-----SMRSLQR-----  
-----SGRLAAEKKKSRQ-----

[142]

SpD3\_hel DE-----DRAVVGDEVKELTL-----  
-----WD-----YQ-----EEVLTPA---W-KG-----  
-----QNAMVV-----LP-----TGTGKTEVAI-----

-----YLRGK-----CEVAGTSGEELNDAS-----LDSII-----  
-----DTN-----DITVL-----TAQV-----LINALK-----D-----  
-----KNTKLQLS-----DIA-----VILFT---WMLHFLILL-----  
LLVLDECHHCQ-----

-----W-----INEDP---DLN-HINAG-----KL-----  
-----TGGN---MT-----STEQ-----NRNLQL-----  
-----FK-----DK-KY-----RILVA-----EG-----  
-----TSVAE-----  
LD-----ITE-----C-----NMVFR-----YNYVT-----SD-----  
-----IGYVQ-----TK-----G-----

[205]

SpF1\_hel -----NIDAMQNWIFPQTQ-QY-----  
 -----RN-----YQ-----KEFCEQA-LFH-----  
 -----NLLLA-----LP-----TGLGKTFIAAVVMLNYFRWF-P-----  
 -----  
 ESKI-IFL-----APT-----KP-----LLLQ-----  
 QRVACSNVAGM-----SP-----GATAELNGEVSPDR-----  
 RLFY-----NTK-----RVFFM-----TPQT-----LQNDLK-----  
 -E-----HLLD-AK-----SII-----  
 CLIFDEAHRA-T-----G-----NH-----SYAQVM-----  
 RAVLRNSHFRVLGLTATPGSSTASVQKVVDCLEHISKLVIRNEESIDIRSYVFHKKMNHLELLKEHFKDTSEGYQ-----  
 -----NQRVMIFTEFRNT-----AEYIT-----TTLA-----  
 -----I-----RPMVR-ASL-FIGQA-----  
 -----N-----SAYSTGMN-----  
 QMQQ-----KETIDQ-----FR-----AG-VI-----  
 -----NTLVA-----TSIGE-----  
 -----EG-----LD-----IGD-----T-----DMIIC-----  
 -YD-AS-----SSP-----IRTIQ-----RM-----GRTG-R-KK-SG-----  
 -KVFVLL-----  
 -----  
 -----TED-----CEDSK-----  
 -----WERSQVS-----  
 -----YRRVQKVIKESGK-----KIALKKDVPRLIPSNIQP-----  
 -IF-----  
 -----  
 -----KFQALQNNADATLILNSYNNSSSSLSPVNT-----LANQAHSRSKRYLPFIVD-----  
 -----DVFEDMESNLR-VPTEDAKIK-[459]-----  
 SpF2\_hel -----MDISSFLLPQLL-----  
 -----RK-----YQ-----QDVYNIA-S-K-----  
 -----QNTLLV-----MR-----TGAGKTLLAVKLIKQKLE-----  
 EQILIQESNLE-----  
 -----  
 HKKISVFL-----VNK-----VP-----LVFQ-----  
 QAEYIRSQL-PAKVG-----MFYGELSIEMSEQ-----  
 LLTNI-----ILKY-----NVIVI-----TADL-----FYLFLA-----  
 -R-----GFLS-IN-----DLN-----  
 LIIFDECHHA-I-----G-----ND-----AYARIM-----  
 NDFYHRAKAVLSKKHFTLPRIFGMTASPFTGKKGNYHRLYQWEQLFDSKAHVSEVFKLLELLKATYRKSD-----  
 -----SVRTVIFVERKAT-----AFTLS-----LFMKT-----  
 -----N-----LPNIR-AHS-FIGHG-----  
 -----P-----SDQGEFSMT-----  
 FRRQ-----KDTLHK-----FK-----TG-KY-----  
 -----NVLIA-----TAVAE-----  
 -----EG-----ID-----VPS-----C-----NLVIR-----  
 -FN-IC-----RTV-----TQYVQ-----SR-----GRAR-A-MA-SK-----  
 -FLIFLNT-----

-----  
-----  
-----  
EELLIHERILHEEKNLKFALSELS-----  
-----  
NSNIFDSLVC EERERTVDDIVVEVGETGALLTGLYAVSLLYNFCNTLSRDVYTRYYPFTFTAQPCLS-----  
GWYCFEVELPKACKVPAAQGS-----PAKSIRK-----  
-----  
-----AKQNAAFI-MCLDLIRMGLIDKHLKPLDFRRKIADLE-----  
-----TLEEDELKDEGYIETYERYVPKSWMKVPEDITRCFVSLLYT-----  
DANEGDNHIFHPLV FVQAH SFPKIDSFILNSTVGPRV-  
KIVLETIEDSFKIDSHLLELLKKSTRYLLQFGLSTSLEQQIPTPYWLAPLNL SCTDYR FLENLIDVDVTIQNFFKLPEPV-  
-----QNVTDLQSDTVLLVNPQSIYE- [681]  
SsM\_helR-----SSAPHT-YSPLK-----P-----  
-----RK-----YQ-----LELALPA-Q-NG-----  
-----KNTIIC-----AP-----TGCGKTFVSLICEHHLK-----  
KFP--RG-RKG-----  
-----  
-----KV-VFF-----AIQ-----L-----PVYE-----  
QQKSVFSKH--FERLG-----YKVAGISGATSDTV C-----  
VEQIV-----ENS-----DIIIL-----TPQI-----LVNCLT-----  
--N-----GTIP--SLS-----VFT-----  
LMIFDECHNT--S--K--QH-----PYNVIM---FSY LDR--K-----  
LGGSSDSL P QVIGLTASVGVGDAKNKAEA-TEYICKLCLRDLCFILQEEYHLNP-----  
-----  
-----ETRTILFVKTRAL---VDALK---KWIKEN---P-----  
-----K-----LSFLK--PSI-LTGRG-----K-----  
-----TNQNIGMT-----LPAQ-----KCVLDT-----  
-----FR-----TDKDN-----KILIT-----  
--TSVAD-----EG-----  
ID-----IAQ-----C-----NLVIL---YE-YV-----GNV-----  
-----IKMIQ-----TR-----GRGR--A-RG-SK--CFLLLTA-----  
-----  
-----  
-----NADLIDKEKMNMYKEEMNGAILILQTW-----  
-----DEAVFKEKIHQIQ-----  
-----  
-----  
-----IREKIIRD NQ GKPEPV PDKKT- [395]  
TaA\_hel-----I-QP-----  
-----RE-----YQ-----LNVFKNS--IGQ-----  
-----NTLIV-----MP-----TGLGKTIIAAMFIEKFYG---E-----  
-----  
-----  
KKRS-LMV-----APT-----KP-----LVLQ-----

HARTIADSTGI-----SE-----NEIGVFTGEIDAE-----  
RELIW-----VTK-----KIFVS-----TPQV-----VFNDMR-----  
--S-----GILD--IT-----KFD-----  
LIIFDEAHRA--V--G-----NY-----AYVDIA--QEY-----  
-----MEKTLSIMESNVHG-----  
-----NARAIVFTHYRIT--SDLLM--DYIQK-----  
-----N-----GTSLK--PVR-FIGQA-----D-----  
-----RGSDEGLS-----QDQQ-----KKIIED-----  
-----FK-----NN-VY-----NVLIA-----EG-----  
--TSIAE-----  
LD-----IPD-----T-----DFVIF--YE-AV-----PSE-----  
-----IRYIQ-----RK-----GRTG--R-SR-NG--QVYILV-----  
-----  
-----FEN--SRDMA-----YYYSSIR-----  
-----KVSRTQTIEDL-----  
-----  
-----RQE--SGSDEK-----  
-----EKSVDVQKTIF-----[317]  
TbE\_hel-----MQDDIPVDGEPCKRCRHETVPAMTFPYE-----  
-----LDA-----FQ-----RDSINAL--E-NG-----  
-----DSVLVS-----AH-----TSAGKTTVALYAIKAVR-----  
-----  
EKKRVIYT-----SPI-----KA-----LSNQ-----  
KFREFTDKF-----DSVGLMTGDTTIKVDS-----  
-----DCLVM-----TTEI-----LRSMY-----  
--R-----GTEM--LR-----EVG-----  
CVVFDEVHYM--RDKSRGV-----VWEETI-----  
-----TEPIMEI I KLVNMRN-----  
-----MYPIIVFSFAKAECERNALALS KLNFNNTTEEDALVTEVFNNAMECLATEDRKLPAIEHLL-----  
-----PLLKRGVGIHHSGLLPILKE-----  
-----VVEILFQAGLVKVLFS-----  
--TETFS-----MG-----  
LN-----MPA-----RTVVFTSVKKF-----  
DGETNRYLTGGEYIQ-----MS-----GRAGRGLDRVGVVIAMVDEA-----  
-----  
VEPEILKQVTGGGADVLNSSFHLTYNMVNLNLLRVEDVDPEFMMRRSFAQFQRLRNRPALMKAELTKDITSICVEHEEM  
FRQYAHCQEQLKRRKQIGDFLKQPVFIRRFTNTGRLLR-----

IRRSTDGALFNWVICRSSRAKTSNADEKDPSSFSDALVICRKADPSQPTQLVPCCHVKDHTINTADLYTVTFDFTDIEAV  
SRFRVNLDPADLDSASSRAEVIQSLEKLYKNHGDDVPLLTSEELGVKDPKFKKLCEQLGNIKQVQKCELVCPTEALEAD  
YESFKKRANLERELDAIKQELDQVTQAI FSDELKMMRVLRRLDYIDKDNI ILRKARVACEITTSDENELLTELLFKGV  
LNSMETEMIVA- [702]

TbE\_DEA\_D

IGGLSVNFPE

EVLPSCYAKNKDSGEWESLKIT

EGENLFENPFEMNLESVLHD

SLLVDGGDPRHDFGKDLGCQLTVGK

AGGGYMGNGD LSE

NIIWG

DGVLGVVKSQMTG

FK

GNTR

ATTYDTAVVWEENPTGGNPTLVKVKDYKLFaelERKVDASHKHLVDRFVQENLYVEDLGTlGRKANSaVDKNTEGEDDE  
EEKSMEDWVAQVDGERVEDRLLGEELKDCGV [227]

TcE1\_hel SEFEQL GIH QWLSKQcAY MALQHP

TP

IQ

KLCIPAI L AG

KCVVGG

AA

TGSGKTAaFALPVLQILA E

D

LYGV

F

A-LVL TPS RE LAYQ

IVDQFVA-L GAPLH I RTAIIIGG-LPHEQQ

LDALK ARP HVVVA TPGR LKFMLEKFPE

A RK-A FL HLR

FLVLDEADRL T SD-D IETDV EEVVR

LAYLVAALRSVGS

DQTTIIIFANSCMR

CEIVR

LTL Q

LL

G

```

-----FP-VCS-LNSII-----S-----
-----QKHR-----IDNLAT-----
-----FK-----LG-IA-----RVLVA-----
--TDIAS-----RG-----
LD-----IPA-----V-----GAVVH-----YD-LP-----KQS-----
--STYLH-----RV-----GRTA--R-AGRKG--LSVALI-----
-----
-----TE-----NDVSL-----
-----VKRLE-----
--KKLQCTLELWKVKGVEKDVLK-----
-----ILDEVSSAKVQAKLQIEDQFGERV-----
-----ETLKAHAAAKKVIRO-----
VKQKKTNGAFAATPNKRDKMQVGKHLPNLLAGEAGTQTKGVRKPTKRDRNDSPEETSMAGE-----
-----[425]-----
TcE2_hel      LVRDHMRKIVDKRLHSFAQLRSKLPRWLFYGIQQ-SGYIKP-----
-----TL-----VQ-----SVAIPLF--M-ER-----
-----RDVVGI-----AP-----
TGSGKTVAFALPALAALPPSDSRGNHERNRGNADNPVVV-----
-----
-----SPNV-LVL-----CPT-----RE-----
-----LVQQ-----TRNVISQLAGNAV-----RVKGAFGG-QGREQQ-----
-----MEQLR-----RWGGC-----DVLVS-----
TPGR-----LCDFVE-----A-----DVVS--LE-----HVG-----
-----FLILDEADRMLEL-----G-----FAPQL-----
EFIMS-----LLQLLSWIGKHVEANH-----
-----EVAGIIFCDTRAS-----VFRIT-----EAIEKI-----PT-----
-----L-----SSLYK--PRA-LVGKG-----
-----K-----TLVDGEEKGMT-----
DAQQ-----RDVIDE-----FR-----KG-NT-----
--RLLVA-----TSLAE-----
-----EG-----LD-----IAQ-----C-----NLVIR-----
-YD-SC-----VSL-----RSFVQ-----SR-----GRAR--R-RN-AL-
-FIVFEHA-----
-----RREIK-----
--VAAVAMK-----
--AVRLQDFLVNAVRDAIEVGTRRAPRVWE-----
-----
-----ESPKFWLRRFERRHNAPIERK-----[403]-----
TcE1DEA_D

```



-----  
----- QPKDEYI -----  
----- VERIE -----  
-----  
----- RHAKIKF -----  
-----  
----- EVLPAPTRDEILRAVARDAEAEDLARVERSATNL -----  
-----  
FMEQAAELLKDADATEILASAIAMSGYTSSITRRGLITGAKGSVTIQMLGQRTLPIPVFCSILRNSLGDNLFTRCRDIT  
LLQESPGCVFDVPEEVADQILSAPIRGMQLGVIETLPPIIARELNSG- [472]  
TbE4\_hel ---VPVNPVKLFSDDL--NLP---DWLSKGLQS-SGFSCT-----  
----- TP-----IQ-----SYTIPVL--D-EG-----  
-----HDMIGL-----AP-----TGSGKTVAFAVPALKKFQ---W-----  
-----SPNG-----  
-----  
SPRI-VVL-----APT-----RE-----LVQQ-----  
TAKVFHQ-L--SSGKV-----RVCEAYGG-APREAQ-----  
ARRLH-----NGC-----DVLVA-----CPGR-----LKDFL---QN-----  
---G-----DV-I--FD-----EVS-----  
FLVFDEADRL--L--DM-G-----FKVQL---DDILG-----  
-----METLVSLIQNGTIDEN-----  
-----  
---TAKMMIFVERQTDTENAAAYLLA---KMLGIH-----  
-----IR--NIGMIHGGM-----Q-----  
-----QRQR-----DYIMNG-----  
-----FK-----HS-QT-----RILVA-----  
---TDVAS-----RG-----  
ID-----FPD-----V-----TCVVN---FI-AP-----KSI-----  
---DRYCH-----RI-----GRTG--R-AGRTG--DSFTFI-----  
-----  
-----GHS DGCL-----  
-----AKDLV-----  
-----CYL-----  
---KK-----CGMEVPQ-----  
-----  
-----KLVDIAEKYVQYEEQRHLRRSWSGRSGRGFKRQ-----  
-----  
-----KQDSPASYQSSSW-----  
----- [371] -----  
TcE5\_hel ---HSPLLAKNVKTKTVTSFEDMLLAPELRKALMQSLHVDTP-----  
-----SP-----IQ-----QTAIEVI--L-QG-----  
-----KDTVVA-----AP-----HGEKTLAYLLPLYQNMM-----  
KDRDVYKIPLRER-----  
-----  
RPRM-ILL-----APT-----KE-----LIAQ-----  
LQHICAAL---DAATG-----LRISISFTSRKRKYH-----  
LSRLL-----KNTLA-----DVVIM-----DPKV-----VLRLIR-----  
---S-----RRLF--LD-----DIR-----  
YVAVDEADVMLSS---Q-----HDH-----



DAVHLLMKVQKRVMFKYLWPVQTQTVFATAYITRKLEFVIGKKFPNAVTCLQRQRMHRPPDTLSHRARRILEQVRPLRWE  
HLTTVAAPFTCHIPRTVFGE-----  
-----GQRIIVFTRGIDS-----ATAVY-----HHLRGR-----  
-----GF-----  
-----P-----  
-----WDVR-----RRMFAD-----FA-----SG-----  
RT-----NILCA-----TDLAA-----  
-----RG-----LD-----V-H-----V-----  
DVVVN-----FH-MP-----TNA-----LVYLS-----RA-----GRTA-----  
R-QRLG-----RVYSLY-----

-----TKHQGVIVSAVRAFLKKN-----  
-----IPLEGVSNS-----KSHMMNP-----

-----RYAEWRTHKMNAIAR-----  
SYVSLITQKTI PAHLERTYLHHNATWRPLFHPQTTGIHAGVPPRQQQRVMDAVTEQAVWFRRGQLARRKGGRAKFGGRDA  
ERGVWNSIGGIATSWVANAAQSANPGGPDFGP [553]  
TcE2DEA\_D

-----FARIVTYL-----AYAT-----  
APVVVFANEKRT-----CDVLY-----DEL--R-----AE-----  
ANHLATLEESFSLEALVGESPPVLQGTLPDNNKHRRRP-----VLNLANMRS-----IAL-VHSEQ-----QAER-----  
-----S-----  
-----RRLVEL-----FR-----RG-ER-----  
RVLIT-----TDLLS-----  
-----RG-----LD-----VPN-----V-----TLVIN-----YD-----  
MPRVDKVGPSMAAASASAGEEAVQKYIH-----RI-----GRTG--R-AGASG--  
VAVSLL-----

-----C-----LP-----  
-----SSLIQRAEQHTLRSAD-----DRSHAGNAAEKPPKQRIDMAGVSTKTRVQERDRQELTGAKNGED-----  
-----LDENL-----LKF-----  
-----ND-----TDDAMDN-----

-----NAEDEDEESDAPPRSRRRMERQ-----QQ-----

```

-----R-GDGGGGGGPPPS-FPHDEPLLQ-----
PLWAFIVSCAEAN-GGGVRGAELIRQQRCLVQMSPALAAALMMAFTRSSPYGAIMT-----
[360]
TcE6_hel      RGRDPPRPMRTWNGS---GLP-----DSVLDLLAR-EGFEQP-----
-----FA-----VQ-----SLGSPAL--M-SG-----
-----RDLLIT-----AK-----TGSGKTLAYLLPLIRHCV---G-----
-----QEPCGKGE-----
-----
GPIG-LIF-----VPT-----RE-----LAAQ-----
IAQLAEKLC-----VAAKLRVSSYGL-TPLADN-----
IRHCR-----AGC-----EVMVC-----TPGR-----LLDLLTVNG-----
---G---AVIS-LR-----RTS-----
FVVIDEADRM--F--DS-G-----FLKLLQIL-----FMEHV---EAFLK-----
-----SDEGGTG-----
-----QHLIIIFAQRKEE---CDELF---ARL-S---AC---G---D---
-----YQKRIAV-LYSGM-----D-----
-----PLDR-----EFALEH-----
-----FA-----PG-NQ-----FILIA-----RG-----
TGVAE-----
LD-----IPY-----L-----ELVIN---YT-LP-----DHY-----
---EAYVH-----RI-----GRTG--R-AGKKG--KAVSFF-----
-----
-----M-----RG-----KDDDL-----
-----SVELC-----
---ER-----AQQQVPE-----EGL-----
-----ELYERAAKLREKRKEGIVRHNTGFYRGYMKAKK-----
-----LRFTDRGQEEQFKAA-----
ARAAGLEEYLSASSCTDSDLSDGDEDGKEDGIEIVAVQEDGTRGGGGRNEEDSTALMLYRDTLSALTSSQQQQEQQERLA
SALAYARKTTDSIVDPSSTCARFEAEYPINDL      [493]
TcE7_hel      YGDSVPQPMLKFSDL--VAP-----DTIHQAFID-LGYKSP-----
-----TP-----IQ-----SIAWPIL--L-NS-----
-----RDLVGV-----AK-----TGSGKTMGFMVPAALHIM---A-----
---Q---PPI-----RVGE-----
-----
GPIA-LVL-----APT-----RE-----LAVQ-----
IEEETR-K-V--LRRVP---T-I---TTACLYGG-TPKGPQ-----
IRALR-----AGV-----HVCIA-----TPGR-----LIDL--EI-----
---R---AA-N--LL-----RVT-----
FLVLDEADRM--L--DM-G-----FEVQI---RKICQ-----
-----QRRLEEIL-----QKLG-----
-----RQRVLIFVKTkRT---ADSLH---GSLR-R---IL---G---E---
-----GA-VMA-IHGDK-----DYLDR-----
-----FR-----RD-DR-----SVLVA-----RG-----
TDVAA-----

```

LD-----IKN-----L-----DVVIN-----FD-MP-----TNI--  
-----EDYVH-----RI-----GRTG--R-AGQRG--DAYSFV-----  
-----  
-----S-----GA-----DPSKT--  
-----IRDLV--  
-RR-----ANQEVPP-----DLL--  
-----ELYEMMGRGGGGGYR--GGGGGGGYRRGGSGG--  
-----YRMGGGGGYRVGYD--  
ARLYAPYGS-----AAAAPVPSAPLLHAGGYPAAPRLPAGV--GGGGGGMYGV--  
PPPPPPPPPRV-----[431]  
TcE3DEA\_D-----  
-----  
-----YVLIARLIERSVEVDLHGEVE--  
GKSVLVFLPGWKELMAAKQALEALNGEQRYHI-----  
-----ILLHSSVDA--  
-----PEGFV-----KKQR-----ECFSPA--  
-----KVVLA-----  
TNIAE-----SG-----IT--  
-----IDD-----A-----AVVIDTGLIKQTSWVSRVTGTQQEHH--  
-ASSYS-----TQLALQYASRANCTQRKG--R-AGRTQGGICYRLF--  
-----  
TREVWDVLPFFQAEIHRVPLTQVLLTLLSLGHTKPKETLQRFIEPPSVKNVEASMRQLRSLGAVTADEKLTPLGLYLSR  
LPCDPRIGKMIMMGAVLRC-----  
-----  
MDSALTMAATADVSPFVTSREVSFEVRQKRHVFSMGSQSDHISVLNAYNAFCARQGDGVFASEQYI-----  
-----HRNNMRIISRYKQQYRDILRRSGFIRDGESFSLEAPE--  
DEFIIPNDDAVAPLHVDSGLLSLDAADVTLVKACLCAALFPNAVLDPSPLL--  
QGGKKAKTLVMRTATHKNISPSKDSACRRLGPPR-----[446]  
TcE8\_hel-----ESKCTSFKAL--GLC-----EELISACAE-AGWQNP--  
-----TR-----IQ-----AATIPVV--K-EG--  
-----RDIIGV-----AQ-----TGSGKTGAYVLPVNWLL---T--  
-----Q-----SKVP-----

-----  
YLSV-LVM-----VPT-----RE-----LAQQ-----  
VTAQFVM-L-GHSVG-----L-----RVATLVGG-ADMVDQ-----  
ACELS-----KRP-----HVVVG-----TPGR-----IKDHLQN-TK-  
--G-----FQ--LV-----KLH-----  
ALVLDEADKM--L--DM-D-----YEKEI--DAILE-----  
-----LPYLHLYLTRET-----  
-----

-----GNHILVFCRSAAL-----VHRIT-----LTLRIL-----G-----  
-----HQ-ALP-LMGRM-----D-----  
-----QTNR-----NIALTK-----  
-----FK-----EG-KV-----RILVC-----  
--TDVAQ-----RG-----  
LD-----ISH-----T-----DVVVN--YA-LP-----DRV-  
--EDYIH-----RV-----GRTA--R-AGAQG--KAVNII-----  
-----

-----SQYDILLQRIEATTGVKCEEWPVQEGDVA AVL-----  
-----QRVEDAEQETIKEIR-----  
ENEQESKFEKEVRQLVTAKKGKREGERGEGDMGYDDSKHGKVD FATLRLRRENEAVFKMTKKEQRKSLWAKRRETQKKIKSQ  
M-----[422]  
TcE9\_hel GQDMSGVSQNEWGNMKEVQLR-----PATLSYLSECAGFRYM-----  
-----AP-----VQ-----AQTVPLL--L-RN-----  
-----YDVVVE-----AI-----TGSGKTLAYLLPCLEMLQ-----R-  
-----DRVIEVCR-----EHKN-----  
-----

-----LPS-----RE-----LAQQ-----  
VHLLAKKMLHFVSHVHADGTAGLPNY-SCQCYIGG-RDITVD-----  
VNMFK-----KAGG-----HVLVG-----TPGR-----LYELLVSSKY-  
--T-----SLFN--FS-----GFE-----  
LLVLDEADKL--L--EF-G-----FRAKL--DAILK-----  
-----IDRLIDFLRERR-----  
-----

-----EQKIIIVMTCAS-----VDWLHAALVDVLLKE-----  
-----DAEHIFALHGQM-----K-----  
-----LEKR-----QRVHRA-----  
-----VT-----KG-KR-----CVLVC-----  
--TDVAA-----RG-----  
LD-----IPE-----V-----GVVLQ--YD-PP-----VDP-  
--STFIH-----RI-----GRTA--R-MGRQG--ESLVFL-----  
-----

MPQELEYVAFMKLQNVLLQPYDEERDSIEAAREFVSRMNAKRTLMSQKE-----  
-----RRKRIQQ-----  
-----

VHKDQKLNKERRERLRKEREEARSGDSRMARKEVVGDLCEPSILALRHAVWDDTDNKLGLATRAFVSFIRAYKEHEC  
RYIFQLQLIDLTLAHSFALFRVPNCGEIKHMQILRIPLQDELQEVVKVVDERTRERQERRAQLSGVRRPHCEREDEDDV  
QLEEEARARVEERALKRQRTERNEKLEALKLTTMTRGERSRAWKQAEIDELLKDSYYVKKERQGKLS- [613]  
TcI1\_hel ---DGEEKPRNFHEM---ELD---DRILKAIK-LGWQTP-----  
-----TL-----IQ-----ERAIPLL-L-EG-----  
-----KDVLVR-----AR-----TGSGKTAFTAFTIPVIQKIL---T---  
-----LK-----KTAKHQ-----  
-----

EIKA-LIL-----APS-----KE-----LCHQ-----  
ICGVIKE-LTVKCSRE-----I---RCVDVAPQ-VELSVQ-----  
KPLLV-----EQP-----DIVVG-----TPTR-----VLKHI---KA-  
---G-----YMDL-KT-----SME-----  
LLVIDEADLV--F--SF-G-----YESEV---KELLE-----  
-----ATILYALLKLHLI-----  
-----

-----RGKTIIIFVNTVDK---CYKIK---LYLEQF-----  
-----GIPTCVLNSL-----P-----  
-----AKIR-----CHSVNQ-----  
-----FN-----QG-IY-----DTIVA-----  
---SDEKA-----LEQPGNPNDPELKSKRKKDKESGVSRG-----  
ID-----FQC-----V-----ANVIN---FD-FP-----LDV---  
---QSYVH-----RA-----GRTA--R-GNNQG--SVLSFV-----  
-----

-----SIREKPL-----  
-----LEQVETHFKSDQD-----  
-----

DVSIFKSYQFKLDEVESFKYRAKDAWRAVTRIAVREARLKEIKQEIFNCQKLKSYFEDNPTDLQVLRHDKALHTVVKIQQH  
LSDVPEYIVPPTLKGIASLGKKKREYYRTSQGSSSRFQAKKNNPLLMSDFEVLIVIGTYFGVAEIGNYEFVGVVWGE  
AQSCTSCGSECQSACGTRHFRTCCFNYYIKKRSSDSLAVDPSLRLELWLAKSRNPYFQRNFLDSFLELPEGVNDHDMTQ-  
[586]  
TcI\_DIC\_D -----  
-----  
-----  
-----  
-----

-----LETLSDSIEELEGKI-----  
-----

NEQKQICEQKAQKEKDSLESLEKRALEEATQQA-----  
-----  
-----NQDEANLAQTEEDLRLILKG-----  
-----IK-----DVFELVECDCAPIILDLLGE-----  
NPDVN-----ED-----  
-----NALIYLGLIEKKVS-----  
SLITTAYFKEKSFAT-----LE-----RDSSQFNLSLKKLKKYTKVFNI-----  
-----  
-----  
-----  
FKNEYENIVTNLEVAAPGYERRDKIMYEELSQRLLHDYNCYHDGEILKKTQMKELEGQIRNVSKAVQCLRNQQITDRQFE  
ERVHNRQTLETLENKLET-----  
-----  
-----  
QMTTFNLI VAKNGKLREEIDHLLWDRRNFLT IWNRFIRKLNTGKRILIDLIEQATIAYDQREEWCNKLQLLRSSAHRDLL  
ANIDQMRS LKQKVDNAKKLEEFFTTKGQKRV MKDLMKKEREREKREERKKKLGTKL-  
QHYESLMNEILD FSQHA EI KDIARKYYNREAQNFSAFKFIADTINMEMINDQLGILHLEIDELKAVHDLRAETQHETID  
NLETDLVQASEETKNAQQDLEDLNLHLK SVM- [491]  
TcI2\_hel -----DLQAGQ TWIYPTNL-PI-----  
-----RE-----YQ-----YTITEKA--LHW-----  
-----NTLVS-----LP-----TGLGKTFIAAVVMYNYFYRWY--P-----  
-----  
-----  
HDKV-IFM-----APT-----RP-----LVKQ-----  
QMDACYNIMAI-----PQ-----EVTAE L TGTKIQQS-----  
RTEIW-----QNK-----RVFFI-----TPQV-----LQNDLN-----  
---I-----IVEL--GP-----KIK-----  
CLVFDEAHRA--K---G-----NH-----AYCEVV---RKL-----  
-----FYQLRDILVAHFTNSDA-----  
-----  
-----STRVIVFFEYRES-----ATEAY---ALLTR-----  
-----S-----FPLIR--SRV-FVGQR-----A-----  
-----GVT-----QKEQ-----INTVKS-----  
-----FR-----EG-TC-----NTLLS-----  
---TCIGE-----EG-----  
LD-----VGE-----V-----DLIVC-----FDIAN-----KSP-----  
-----IRMIQ-----RM-----GRTG--R-KK-EG--RVVVLV-----  
-----  
-----  
-----TEG---REQQTLKDCL IYKNNLGS-----  
-----FATNSQLLQEG-----  
-----K---YTDNPKMIPSYVQP-----KC-----  
QKMCITVKKPVVTKTANLK-----DMLRNI-----  
-----  
-----SDDLEIVE-IKERISDKIDNFWN-----  
-----KTR E EFFQIEAKPKIDFAKHLEKQRVF-----QAN-----  
SKSKQTEIFVTLLQFADSKRFNLPV-TQKSI FSDFNQHKYLKQGDIRSMFAKPNVNALSQEPVVSQKFSFGGEKDVTQ---  
-----SFPPELFEELS-TFLSIQDLY- [506]

TnV1\_hel -----PTNY-PV-----  
-----RE-----YQ-----LKMSEAA-LFQ-----  
-----NTLVC-----LP-----TGLGKTFIASVVMYFYRWY--P--  
-----  
SGKI-VFM-----APT-----KP-----LVAQ-----  
QIEACYKVMGI-----PQ-----AHMAELTGSTAAKQ-----  
RQEVW-----RTK-----RVFFL-----TPQV-----MVNDLS-----  
--R-----ETCP-AQ-----QVK-----  
CVVIDEAHKA-L-----G-----NH-----AYCQVI-----  
RQLSSQTLQFRILALSATPGGDAKSVQSVVS-----  
LQKLEEVVLQHFRLWAESSADKNGCGAQEV-----  
-----STRVMIFSSFRES-----VQEIA-----AMLNR-----  
-----H-----APLIR-----  
VMT-FMGQA-----S-----AGKGVKGFT-----  
-----QKEQ-----LEVHR-----FR-----  
-----QG-GF-----NTLVS-----TCVGE-----  
-----EG-----LD-----IGE-----V-----  
-----DLIVC-----FD-AQ-----KNP-----TRLVQ-----RM-----  
-----GRTG--R-KR-QG--RIVVIL-----  
-----  
-----SAG--REERT-----YNQSQSN-----  
-----KRSVYKAITGN-----  
KSGFRLYPNSPRMLPQGLNP-----TL-----HKMHITCG-----  
-----  
QFDHQVSSRR-----SVRGQSRCEGRASLIHPQNLVHPGST-----  
-----ASDGFLSSAEFSVWASTMRLGEDE-----A-RPVLKRSQFMTLP-----  
ADPQTQGECR-----YEQ-----DLLPHLHQADD-HFKKVQKKK-  
[484]  
TnV2\_hel -----GTRAGDEESEDID-----L-----  
-----WD-----YQ-----MEVARPA-L-EG-----  
-----ENIIC-----LP-----TGRGKTRVAVYVAKKHLE-----  
SRK--AKGKIG-----  
-----  
-KV-VVL-----VNQ-----I-----PLVE-----  
QHYATEFLP--FLKHT-----YKVERVSGDSQLKIS-----  
FTDTV-----RKN-----DVIIC-----TAQI-----LENYLE-----  
--R-----SRTG--EDEGVNLS-----DLS-----  
LIVIDECHHT--Q-----K-----GG-----VYNQIM-----VRYLMQ-----  
KHKNIKLRKEQKPTAPLPQILGLTASPGVGSATKMAKA-VEHILRICLSKLTQVLFSTRL-----  
-----DA--RGIIFTKTRRG-----AIALT-----QWIREN-----SKF-----  
-----A-----DMDVK--PAY-VIGGG-----  
--DQ-----SVVKPMT-----AAEQ-----  
-KDVLNK-----FR-----NG-EV-----NLLIA-----  
-----TSVAE-----  
-EG-----LD-----IPK-----C-----NFVIR-----YG-HV-----  
--ANE-----ISMIQ-----TE-----GRGR--A-ED-SS--YTVVDVK-----





FTDTV-----RKN-----DVIIC-----TAQI-----LENYLE-----  
--R-----SRTG--EDEGVNLSLA-----DLS-----  
LIVIDECHHT--Q-----K-----GG-----VYNQIM---VRYLMQ---K-----  
-----LSKLTQVLFSTRL-----  
--DA--RGIIFTKTRRG----AIALT----QWIREN----SKF-----  
-----A-----DMDVK--PAY-VIGGG-----DQ-----  
-----SVVKPMTN-----QAEQ-----KDVLNK-----  
-----FR-----NG-EV-----NLLIA-----EG-----  
--TSVAE-----  
LD-----IPK-----C-----NFVIR--YG-HV-----ANE-----  
-----ISMIQ-----VSSLSNVYTYTFGRGR--A-ED-SS--YTVVDVK-----  
-----  
-----N--SGVAE-----KETVNEY-----  
-----RKNMMDKAIEKIG-----  
--ALXHADYDK--Q-I-QEFQMQAI-----  
-----  
-----MEYM-----  
-----LRMKAKKQEDIKNEPSNVKF- [370]  
TtE\_DEA\_D-----  
-----  
-----SQVLLSILSKS-----  
EGISLIFCNSKVVKYVTKFIQ--SVFQNS-----  
-----NSDQKCCEYIMGQT-----  
SQNKKDEEDNNLKIINSINPYEIQNLKSQSVQQAQNI IQQEKQFSIKFYALKQK-----YSEQ-----  
QKIVER-----FR-----NK-QF-----KILVS-----  
-----TSVVE-----  
EG--FD--IPS--C--NIVIA--FSKII--  
--SQ--RQYIQ--MK--GRAR--AENSKFYALVAVY--  
-----  
-----NNNKIKLQNHQIVSDQIKQEYYSLSLLTQKQFSQEKEKHQVNDDEDDTS-----  
MENYENFIIPETNANVNTFWVKEIVNQFCQSFCYNSQLDNRFPVFDCLINERGQYLSLIIILPFQLQANIFMNLQKLFK  
KEDAQRCAFMQAVKSLLNKYISNELRPRHKSXKFNFYFG-----

RGEDDYVVEYS DRYFAIIQKNMQEVFVGYLNGKKRQIVVYKKLYRQIVDEVFVQKEQIQQREFHPPFYLYDIQYKGELLQV  
KLIYDKQCLEGF IHQDIKFIFHNQINLSNEELNEIRKINQQAHLKLLNLDKMNLEPKKIYTSKCLIIYKKTQILDYKNTEE  
SVLINENVVFLYIMSDLNQNIKEIKQINNHIDQIRDFLKLLKIISEKISKKLNQEIIDFQNMQIEQLNVFIKPNFKLTGS  
LSKSNIKQD- [594]  
TtE1\_hel -----EIFKDQVSPKINEQGKNTIYEI-----  
-----RN-----YQ-----KELFKNS--Y-S-----  
-----KNSIIY-----LE-----TGAGKTMIAATMLINIFFQ-----  
KQK---KAPQ-----  
-----  
KKKI-IFL-----ANT-----VQ-----LVKQ-----  
QYAEIKNNL--QRISE-----  
MMENDKEISQILKFQEGINRYRRIFEKENHIVKCHGSYKQKDNLQIETFTKQKWDYLL-----ENY-----  
----EIFVM-----IGQV-----LLNGLR-----R-----GYIR--IE-----  
-----DIE-----VIIYDECHHT--R-----Q-----DH-----  
-----PYCLIQ-----  
YEFYHFHKRRNEQVQLPKIYGLTASPVLDIEVKSDSNIMKKKISELCTNLDANFVKLKNLQLYIEKVLKKEFGKVS LIED  
ETDIKE-----  
-----GKKRFFIQSEDNNKEVSFEVYAYDQIDAIDQI-----  
-----YIEINQKKPNKQQS-----  
-----  
MGCVCAKPKPQSNKSIKKEENQGIKANRSDSPSQEKNAKEELHTNKEETQMDLLQKKEIYIDEYEEEE-----  
VNRYYE-----FEQKDRALLAKYSQVMDRGKKVKLEIENQKEKP-KLNQGSEKRFKELLNL-----  
-----TQMIE-----  
SN-----LE-----QSE-----LIQGDIVIVLGATGVGKSTTINYLLGKKMIWSKIQ-----  
---NQTksyVVEVEGITV-----AK-----GEQEAAK-IGTKPMESQTKTI-----  
-----  
-----NVYNVQHPKDERELVLC DTPGLLDSQG-----  
SIVDIANQVGIVKSLQYAKSIRVLLLIGYKNLVSVEGKGLIKEVIDLYSKLIKDYEESQESVLI GFTHLNSDTTLQOIN  
NSLKAMTDSVSDDDKVSQFLHISIQSIEKKNKLF TLIKPLISDKRQNLIDSLFNIQEIPQERNVQYFTYALAQNTKNEFE  
LILQSYQKDISNLFQREEYDQITN-----  
-----  
RLSVLKKLNEQLEFTIVKKCYAESVQAVINLDLVKQTQSLLQRITSLQQEMVQILLQNI VKVSNYLCWTDQIRHEYQEIN  
DCIISYNDFIDILSSALEE-----CLQSIEK-----  
-----  
TENYKVTIQDLLKLYYVYYCSEIEDTFKANAKTLRI FHKGQVKIKSIYTNNFYTAACFSISKRVITLLEQMDELVKSNEE  
VNVNDLESNLSKLDLHEQQVG-----  
DHLQLNSQLIYQE QVKKWCDFIQKKTVFEIDYNKYDQVLKNIDQMKIAYHF LAQISGSQRLMNDHFPQFKTAQK-  
DTTQKL VQQAIMLFNKAITQKKLGHMEKPIQCAMEIMNISDDIRNKLQEASQALFVHLGSIVQKFD MFSSCSSQIKNCL  
IPKYETANKDLFKSTTEDEFQIVKKKINSIQ- [1149]  
TtE2\_hel -----NLEVNQNTIQYWYYTLGKSF-----  
-----RE-----YQ-----YSIVKTC--L-S-----  
-----NNTLVA-----LP-----TGLGKTFIAATVILNYYL-----  
WFP-----  
-----  
KGKI-FFL-----APT-----RP-----LVNQ-----  
QMECLSQFE--LINKN-----DIFEMTGNYP IPKRR-----  
-DVY-----LRK-----RIFFC-----TPQT-----LENDLI-----  
--E-----QRyd--GY-----NLS-----  
LVIFDEAHRG--T-----G-----KY-----AYVNIV---THF-----  
ESLGYGYRILALSATPGNEFEQIQDVLKNLRISKLEIKDEEDPDIKSEKLVELLTNYFLEEESIVN-----

-----RSKTIIIFTQSRNS-----ASELK-----KLLNNI-----DV-VNPA-----  
-----G-----DKLIR--SEI-FIGQA-----  
-N-----LDGQGMN-----QKAQ-----  
IETIKL-----FK-----QN-VY-----NTLIA-----  
-----TCIGE-----  
EG-----LD-----IGE-----V-----DLIVC-----YD-SG-----  
-----FSP-----IRMIQ-----RM-----GRTG--R-KR-AG--KQYVLL-----  
-----  
-----MEG--REYAN-----YNQSQKK-----  
-----  
HKELMMLLKNNSC-----SQSVTDFQ-----Q-KGRTGRQPKATKRTFEFYGFNPRMIPQDVNP-----  
ICRIIKGQNNDFTPAISSQSESEQ-----EDFFEF-----  
-----QGSKQNKKE-KQSNQIQKKKSIIQ-----  
-----LEVEEEEEEEQLFKVEIKKDLEDQYCYEIDEEDFEPPQYLM-----  
KPSFEKPKQSLEKTQKQEQEIQDRLLQLANNINGKRQQ-----  
PPPIKQPQIPQQKIMSTPETMTPFSNFSNEKFMRNSSNGNKKQTSVFDTN-----  
-----IKRSSTTNQLR-KSDPKQITKI [617]  
xlV\_hel -----ME-----L-----  
-----HD-----YQ-----WEVIGPA--L-EG-----  
-----KNIIIW-----LP-----TGAGKTRAALYVAMRHLE-----  
MKR--NA-----  
-----  
-KV-CLM-----VNK-----V-----HLVD-----  
QHFSNEFHP--HLKDK-----YKVVAISGDTEHKCF-----  
FAELV-----QNN-----DVIIC-----TAQI-----LQNALS-----  
--S-----SS-----EEIHVELT-----DFT-----  
LLIIDECHHT--H-----K-----DG-----VYNKLM-----EGYLER--K-----  
-----LRKLEEILRDQFQFSS-----  
-----GS--RGIIFTRTRQS-----THSLH--NWISSK-----HSF-----  
-----Q-----IMGVK--TAP-LTGAG-----YS-----  
-----NQSK--HMT-----QNEQ-----RETIEM-----  
-----FR-----KG-QL-----NLLIS-----EG-----  
-----TSVAE-----  
LD-----IPQ-----C-----NIVVR-----YG-LM-----TNE-----  
-----ISMVQ-----AR-----GRAR--H-ED-SC--YSFLAKI-----  
-----  
-----G--GKEIR-----REETNET-----  
-----LEGLMKRAIEAVQ-----  
-----RMPEQEYQKKI--KELQEESV-----

IARK

VKQAKRDQKRNTF-YPEQVRF- [358]

TcE10\_h\_H DFVYRCEVMLMDVTENSVSLRDMFDAKYGSSHNKSSSEWLFQP

SVLTSYSWPD

ASCDVNLPTPSILLPKMREFQL

FYSQVRPKRHISFVSRCSRGVVRMNLPRDSRVPSIDL CVGQS

QLLLAEC

FNNRTDWSIGNLLQTMEVTNNEIFLRSLNAFAGCGI

LEVYDEGGPVDLPLRSVMAGKYVRL

[184]

TcI3\_he\_H ERLRHEIELQRQQDQNNFAQMKADEAKLRIALQSEESLKQR

CDTSVGD LAKMRDEYRMK

IDELQH

AVQEKDLTVANLQNKCS

AVKQ

YEDQLRVVNDDELNRRLQECQQKISSFNDETANLKQELAKKSEQLIEARAESSHILAQRQQLENELKQKYSQDTKQLEFEL

NGKNMELEKALTEVQLLRND CQNTNSNLTA KDDQIS

ELAAQVKNAQNVINQLQEELTTTRLKQQQSFNEHENVNQC

KGLLDQVASLTEQVKNGEAVFKNLEIEHKNAMQLVNRLRITEQQKQQCLQQLOQEASSGGDNKNCDHVMQLLNQVKVDNT

TGNTKILNLQKDLDLLRNQLAERNHQFDVQQNELLRL

[363]

AgI22\_h\_H AAQLQTHKDSKHVPKEKFACQLCPLKFTLKGNLTKHLIVHDG

-NRSFSC-

DVCGKTFLRTNALKHHMLSHRVKRY

-QCQSCNKEFIDARNLERHLKTHSRLKGFKCSICGVTSTRKDN-

-IVRHAKSFHPESDLKEIVLANGNVSEDQM-

-EAIKREAQTS-

[154]

AmI5\_he\_H -SDL- -KLD- -KQLTNALTA-AGYENP-

TP- -VQ- -LESIPAV- -L-DN-

-QDLMVS- -AQ- -TGSGKTA AFL LPTLQKLL- -K-

-RSEKSGKG-

PRA-LVL-----TPT-----RE-----LAQQ-----  
VEKNAQ-----IYG-----

[94]

CfM2\_he\_H-----ME-----L-----  
-----RP-----YQ-----WEVIMPA--L-EG-----  
-----KNIIW-----LP-----TGAGKTRAAAYVAKRHLE-----  
TVD--QA-----

-KV-VVL-----VNR-----V-----HLVT-----  
QH-CEEFSR--MLGKR-----WAIITLSGDMGPRAG-----  
FGHLA-----RSH-----DLIIC-----TAEI-----LQMALT-----  
--S-----PE-----EEEHVLEN-----AFS-----  
LLVVDECHHT--H-----K-----DT-----VYNLIL----SRYLEH--K-----

[153]

DrV3\_he\_H -----EIK-----L-----  
-----RD-----YQ-----MEVARPA--L-EE-  
-----KNIIVC-----LP-----TGSGKTRVAVFITKEHLE-----  
RKQ--RMGQKG-----

-----E-----  
QHYKAEFGR--FLKHQ-----YSVERVSGASQLKIS-----  
FPQII-----EKN-----DIIIC-----TAQI-----LENSLA-----  
--K-----AKNG--DEDGIELST-----EFT-----  
LMVIDECHHT--K-----K-----GG-----VYNHIM----IRYLKQ--K-----

[150]

DrV4\_he\_H -----ELT-----L-----  
-----RP-----YQ-----EKVVQAA--L-RG-  
-----ENSIIW-----LP-----TGGGKTRAAVYVAEKHLE-----  
TKA--NA-----

-----D-----  
QHMKKEFGQ--YLRHK-----YRIKAISGDSSEKDF-----  
FGRLV-----RVS-----DLVIC-----TAQI-----  
-----S-----DFT-----  
LLIIDECHHT--N-----K-----ES-----VYNKIM----WRYVEK--K-----

[127]  
GgV3\_he\_H -----CFRFRFSRDAAME-----L-----  
-----HG-----YQ-----LEAVAPA--L-RG-----  
-----RNSIVW-----LP-----TGAGKTRAAVHVCRRHLE-----  
GRR--GG-----

-RV-AVL-----VNK-----V-----HLVQ-----  
QHLEKEFH--VLRDA-----FKVTAVSGDSSHKCF-----  
FGQLA-----KGS-----DVVIC-----TAQI-----LQNALL-----  
--S-----GE-----EEARVELTGGCGTPRPGWGLP-----RGE-----  
RLTLLPCFAQ--A-----D-----FS-----D-----LL-----KKLSGQ-----R-----

[173]  
MmM4\_he\_H -----LA-----NS-----SNRDGPA-----  
-----ANECL-----LP-----AVDESSLETEAWNVD-----





[202]

LiE\_hel\_H PPLHGVICSEEVWLWPLNAFEAGSARGSRLTESTNGPFADKGS

VLSLLLSRLVVGSSVTNPEISAGGQAARVSVVLDEGQETGQORIEN  
---DRCGASRAPSTHAGGVAAPG---

QDPLHRASAVDVERHGGAPSTSALCEPAEQVCGCQDIVLEQFPFCVSLTSGGTIATSSPHSPACTPASESSANAAHAE  
NGAHTGASAGHVGSLLQDPALAAADARTTTWVDYY  
ASSTQAIGVVPLQTRLQONLYTVPSQQLLDRLKDQLGPPSLSA

ASPTAEPAPVTYHGLWYGRDRQINFSRCLGSSGSAQEEIRREQEVKRS GAALLAGMQIDGGDSSVSPSASPMARVKGHYV  
EVRTESALALLRRQALGGLQRRRIM

[371]

MmM6\_he\_H PTNC-PV  
RD YQ LDISRSA-LFC  
NTLVC LP TGLGKTFIAAVVMYNYRWF-P

SGKV-VFM APT KP LVTQ  
QMEACFHVMGI PQ SHMAEMTGSTQAVN  
RKEIW SSR RVLFL TPQV MVNDLT  
R GAVP AT HVK

CLVVDEAHKA--L-----G-----NY-----AYCQVV-----  
RELVKYTTTHFRILALSATPGSDIKAVQQVIT-----

[175]

MmM7\_he\_H-----ME-----L-----  
-----RP-----YQ-----WEVILPA--L-EG-----  
-----KNIIIW-----LP-----TGAGKTRAAAFVAKRHLE-----  
TVD--RG-----  
-----VNR-----V-----HLVS-----  
QH-AEEFRR--MLDKH-----WTVTTLSGDMGSRAG-----  
FGLMA-----RSH-----DLLIC-----TAEI-----LQLALN-----  
--S-----SE-----EDEHVELR-----EFS-----  
LIVVDECHHT--H-----K-----DT-----VYNTIL----SRYLEQ----  
KLKKAEPPLPQVLGLTASPGTGGATKLQGAIDHILQLCA-NLDTCHIM-----

----- [198] -----  
OvV4\_he\_H ----- Y-EV -----  
----- RK----- YQ----- FNIVSRA- -LFE-  
----- NCLVA----- LP----- TGLGKTFIAAVVMYNFYRWF- -P-  
-----

-----  
QGKV-VFL----- APT----- KP----- LVAQ-----  
QIEACFKIMGI----- SQ----- ADTASMTGATPPCE-----  
RSTLW----- KFR----- RVFFL----- TPQT----- LHNDLG-----  
---S----- LIAP-AH----- QIV-----  
CIVIDEAHRA-M----- G----- SH----- PY-----  
-----

----- [137] -----  
PtM3\_he\_H ----- ME----- L-----  
----- RP----- YQ----- WEVIMPA- -L-EG-  
----- KNIIIW----- LP----- TGAGKTRAAAYVAKRHLE-----  
TVD--GA-----  
-----

-----  
-KV-VVL----- VNR----- V----- HLVT-----  
QH-GEEFRR- -MLDGR----- WTMTTLSGDMGPRAG-----  
FGHLA----- RCH----- DLLIC----- TAEL----- LQMALT-----  
---S----- PE----- EEEHVLT----- AFS-----  
LIVVDECHHT- -H----- K----- DT----- VYNVIM- - -SQYLEL- - -K-----  
-----



```
BEGIN SETS;
  CHARSET hel = 1-895;
  CHARSET ded = 896-2565;
END;
```

```
BEGIN ASSUMPTIONS;
  OPTIONS DEFTYPE=unord PolyTcount=MINSTEPS ;
END;
```

```
BEGIN partitions;

charpartition helvded=hel:1-895, ded:896-2565;
END;
```

```
BEGIN ASSUMPTIONS;
```

```
USERTYPE GI STEPMATRIX= 20
  A C D E F G H I K L M N P Q R S T V W Y
[A] 3 1 2 2 1 2 1 1 1 1 1 1 2 1 1 2 2 2 1 1
[C] 1 3 1 0 2 2 1 1 0 1 0 1 1 0 2 2 1 1 2 2
[D] 2 1 3 2 1 2 2 1 1 1 0 2 1 1 1 1 1 2 0 2
[E] 2 0 2 3 0 2 1 1 2 1 1 1 1 2 1 1 1 2 1 1
[F] 1 2 1 0 3 1 1 2 0 2 1 1 1 0 1 2 1 2 1 2
[G] 2 2 2 2 1 3 1 1 1 1 1 1 1 1 2 2 1 2 2 1
[H] 1 1 2 1 1 1 3 1 1 2 0 2 2 2 2 1 1 1 0 2
[I] 1 1 1 1 2 1 1 3 2 2 2 2 1 1 2 2 2 2 0 1
[K] 1 0 1 2 0 1 1 2 3 1 2 2 1 2 2 1 2 1 1 1
[L] 1 1 1 1 2 1 2 2 1 3 2 1 2 2 2 2 1 2 2 1
[M] 1 0 0 1 1 1 0 2 2 2 3 1 1 1 2 1 2 2 1 0
[N] 1 1 2 1 1 1 2 2 2 1 1 3 1 1 1 2 2 1 0 2
[P] 2 1 1 1 1 1 2 1 1 2 1 1 3 2 2 2 2 1 1 1
[Q] 1 0 1 2 0 1 2 1 2 2 1 1 2 3 2 1 1 1 1 1
[R] 1 2 1 1 1 2 2 2 2 2 2 1 2 2 3 2 2 1 2 1
[S] 2 2 1 1 2 2 1 2 1 2 1 2 2 1 2 3 2 1 2 2
[T] 2 1 1 1 1 1 1 2 2 1 2 2 2 1 2 2 3 1 1 1
[V] 2 1 2 2 2 2 1 2 1 2 2 1 1 1 1 1 1 3 1 1
[W] 1 2 0 1 1 2 0 0 1 2 1 0 1 1 2 2 1 1 3 1
[Y] 1 2 2 1 2 1 2 1 1 1 0 2 1 1 1 2 1 1 1 3
```

```
;
```

```
USERTYPE PAM STEPMATRIX= 20
  A C D E F G H I K L M N P Q R S T V W Y
[A] 10 6 8 8 4 9 7 7 7 6 7 8 9 8 6 9 9 8 2 5
[C] 6 20 3 3 4 5 5 6 3 2 3 4 5 3 4 8 6 6 0 8
[D] 8 3 12 11 2 9 9 6 8 4 5 10 7 10 7 8 8 6 1 4
[E] 8 3 11 12 3 8 9 6 8 5 6 9 7 10 7 8 8 6 1 4
[F] 4 4 2 3 17 3 6 9 3 10 8 4 3 3 4 5 5 7 8 15
```



```

[V] 8.4 7.0 16.0 13.2 8.7 14.1 14.4 4.0 12.8 5.5 6.0 14.4 10.5 12.7 13.3
11.2 8.7 . 12.9 11.9
[W] 19.8 8.8 27.1 22.9 3.9 16.5 10.9 12.5 19.4 9.7 10.9 19.9 22.0 16.7
12.2 19.0 19.5 15.2 . 3.6
[Y] 14.3 7.9 15.6 15.8 2.8 16.5 5.5 9.7 14.1 8.3 9.0 12.0 14.2 13.3 12.7
13.7 13.5 10.8 2.8 .

```

```

;
END;

```

```

BEGIN TREES;

```

```

TREE * UNTITLED = [&R]
((((((((AfA_hel,((CrA_hel,HaA_hel),MtA_hel),(MaA1_hel,MaA2_hel))),((EuA_hel,MkA_hel),MhA_hel)),PfA_hel),MjA_hel),MsA_hel),TaA_hel),NeA_hel),((((((((AeI_hel_1,AgI_hel22),DmI6_hel),AmI_hel1),CiV_hel),((AD_HYP1_D,((BtM_helU,(HsM1_hel,PtM1_hel)),MmM6_he_H),TnV1_hel),AtP_hel),TcI2_hel),OvV4_he_H),AoF2_hel,SpF1_hel),CbE_hel),DdE2_hel,TtE2_hel),((AeI_hel_2,DmI1_hel),((AmI_hel3,TcI_hel),DmI7_hel),((((BtM_hel2,(MmM3_hel,RrM3_hel)),CfM1_hel),((HsM4_hel,PtM2_hel),MaM2_hel),GgM_hel),GgV_DAE_D),DrM_hel),CeW_hel3),((AoF1_hel,SpF2_hel),AtP_DCL_D,(PtE_helU,TtE_DEA_D),(PyE_IFH_D,TtE1_hel))),DdE1_hel,DdE3_hel),((AD_HYP2_D,(((BtM_helM,(GgV2_hel,MdM_helM),(MaM_helM,(MmM1_helM,RrM1_helM))),(((BtM_helR,SsM_helR),MaM_helR),MmM_DEA_D),SpD2HYP_D),(HsM_DEA_D,HsM2_hel),MmM5_hr_H),(((DrV_heR_D,DrV2_hel),DrV1DEA_D),DrV3_he_H),(FrV2_hel,(TnV2_hel,TnV4_hel),OvV1_hel)),((BtM_hel1,CfM2_he_H),(CfM_DEA_D),(HsM3_hel,(PpM_hel,PtM3_he_H),MaM1_hel)),(MmM2_hel,MmM7_he_H),RrM2_hel),((DrV1_hel,DrV4_he_H),(DrV_mgc_D,(FrV1_hel,TnV3_hel),(OvV2_hel,OvV3_hel))),GgV3_he_H,XlV_hel))),(((CiV_DIC_D,CsV_DIC_D),SpD1_hel),SpD2_hel),((SpD_DIC_D,SpD3_hel),SpD1HYP_D)),CbW2DEA_D,CeW_hel1))),((((((((AD_HYP3_D,TcE1_hel),AgI_hel18,TcE8_hel),AgI_hel7),(((AgI_hel13,TcE7_hel),AgI_hel10),AgI_hel12),AgI_hel4,TcE6_hel),AgI_hel15,AgI_hel16),AgI_hel17),AgI_hel5,TcI1_hel),TcE3_hel),((((((((AfF_ifhi,AmI_hel2),AgI_hel13,DmI2_hel),AgI_hel19),CeW_hel6),AgI_hel8,AgI_hel9),AgI_hel1,TcE2DEA_D),AmI5_he_H),AgI_hel11,AmI_hel4),CeW_hel4),AgI_hel21,DrB_tn3_D),TcE9_hel),AgI_hel16,((AmI2DIC_D,BF_C1_D),DmI3_hel),TcE1DEA_D,TcE5_hel),AgI1DIC_D),TbE4_hel),TcE2_hel),((AB_hel,CbW_hel2),CjB_hel),AgI_hel14,AmI1DIC_D),TcE3DEA_D),AgI_hel20,((BtB_hel,CbW1DEA_D),CpB_top_D,(TbE_hel,TcE11_h_H))),TcI3_he_H,((((AgI_hel2,CeW_DEA_D),TcI_DIC_D),(Sme_hel,TbE_DEA_D),((CaF_hel_D,DmI4_hel),((DmI2DIC_D,EcB_hel),MmM4_he_H,LiE_hel_H),AgI22_h_H),DrV_heM_D),DmI1DIC_D),CeW_hel5,(DrV2DEA_D,GgV1_hel),TcE10_h_H),AgI2DIC_D,DmI5_hel)))));

```

```

END;

```

```

BEGIN MacClade;

```

```

Version 4.0 87;
LastModified -1014579537;
FileSettings treewindow '0' '0' '1' '1';
Singles 010;
Editor 000110011111111100100010010 '0' '24' Geneva '9' '100' '1' all;
EditorPosition '46' '6' '963' '1611';
TreeWindowPosition '46' '6' '981' '1630';
ListWindow Characters closed Geneva '9' '50' '10' '273' '412' 000;
ListWindow Taxa closed Geneva '9' '50' '10' '273' '384' 100000000;

```



```

ListWindow Trees closed Geneva '9' '50' '25' '273' '393' ;
ListWindow TypeSets closed Geneva '9' '50' '10' '276' '490' ;
ListWindow WtSets closed Geneva '9' '50' '10' '276' '490' ;
ListWindow ExSets closed Geneva '9' '50' '10' '276' '490' ;
ListWindow CharSets closed Geneva '9' '50' '10' '276' '490' ;
ListWindow TaxSets closed Geneva '9' '50' '10' '276' '490' ;
ListWindow CharPartitions closed Geneva '9' '50' '10' '276' '490' ;
ListWindow CharPartNames closed Geneva '9' '50' '10' '276' '490' ;
ListWindow WtSets closed Geneva '9' '50' '10' '276' '490' ;
ChartWindowPosition '52' '30' '968' '1620';
StateNamesSymbols closed Geneva '9' '10' '50' '30' '148' '220';
WindowOrder Tree;
OtherSymbols &/ 00 ?-;
Correlation '0' '0' '1000' '0' '0' 10011010;
Salmo 00000001;
EditorFile '2';
ExportHTML _ MOSS '100' 110000;
PrettyPrint 10;
TreeLegendPosition '944' '1437' '64' '93';
EditorToolsPosition '851' '46' '115' '165';
TreeToolsPosition '866' '9' '126' '138';
TreeWindowProgram 10;
TreeWindow 0000;
Continuous '0' '3' 1;
Calculations 0000001;
SummaryMode '0' '0' 0;
Charts Geneva '9' (normal) 0010;
NexusOptions '0' '0' '2565' 101000100;
TipLabel '1';
TreeFont Geneva '9' (normal);
TreeShape 1.0 1.0 1100;
TraceLabels 0101;
ChartColors '0' '0' '65535' '9' '0' 1;
ChartBiggestSpot 1;
ChartPercent 10;
ChartBarWidth '10' 1;
ChartVerticalAxis 10101;
ChartMinMax '0';
TraceAllChangesDisplay '1' 1;
BarsOnBranchesDisplay '0' '0' '60000' '10000' '10000' '10000' '10000'
'60000' '65000' '65000' '65000' '6' '1' 0000101;
ContinuousBranchLabels 0;
AllStatesBranchLabels 1;
IndexNotation '2' 1;
PrintTree 10.00 '2' '2' '2' '2' '2' '2' '2' '2' '2' '2' '2' '2' Geneva '9'
(normal) Geneva '6' (normal) Geneva '9' (normal) Geneva '9' (normal) Geneva '9'
(bold ) Geneva '9' (normal) Geneva '9' (normal) '83' '115' '13' '45' '116' '148'
'13' '45' '149' '181' '13' '45' '182' '214' '13' '45' '252' '103' '0' '0'
'21372' '456' '636' '35' '678' '35' '678' '288' '24' '35' '1' '1' '1' '1'
'27136' '0' '-39' '4' '-40' '0' '1' '2' '1' '8' '2' '2' '0' '2'
00101100000000000010100000111000;
MatchChar 00 .;
EntryInterpretation 01;
ColorOptions 00;

```

```
TreeTools '0' '5' '4' '0' '10' '4' '0' 00100111111101110;  
EditorTools '0' '0' '0' '1000' '0' '0' '6' '3' '1' 100010101110011;  
PairAlign '2' '2' '3' '2' '1' '1' '2' '1' '3' 1010;  
BothTools '1';
```

```
END;
```
